# Supplementary material for: H2activation by hydrogenase-inspired NiFe catalyst using frustrated Lewis pair: effect of buffer and halide ion in the heterolytic H–H bond cleavage
Source: Royal Society of Chemistry journal article supplement (doi:10.1039/d1ra05928a), 2021-01-01
Supplement: d1ra05928a1.pdf [file d1ra05928a1.pdf]

## Supporting Information

# **H<sub>2</sub> activation by hydrogenase-inspired NiFe catalyst using frustrated Lewis pair: Effect of buffer and halide ion in the heterolytic H–H bond cleavage**

Miho Isegawa,<sup>\*a</sup> Takahiro Matsumoto,<sup>a</sup> Seiji Ogo<sup>a</sup>

<sup>a</sup>International Institute for Carbon-Neutral Energy Research (WPI- ICNER), Kyushu University 744  
Moto-oka, Nishi-ku, Fukuoka 819-0395, Japan

\*E-mail addresses: [isegawa.miho.169@m.kyushu-u.ac.jp](mailto:isegawa.miho.169@m.kyushu-u.ac.jp)

### Contents

|                                                                             |            |
|-----------------------------------------------------------------------------|------------|
| 1. Key geometrical parameters of complex 1 and complex 5                    | Page S2    |
| 2. Free energy profile of H <sub>2</sub> evolution reaction by NiFe complex | Page S3    |
| 3. Imaginary frequencies of optimized transition state                      | Page S4    |
| 4. Total electronic energy, thermal corrections to enthalpy and free energy | Page S5-S6 |
| 5. XYZ coordinates                                                          | Page S7-   |

(a) Complex 1

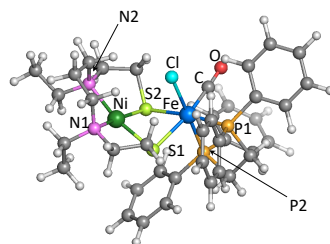

(b) Complex 5

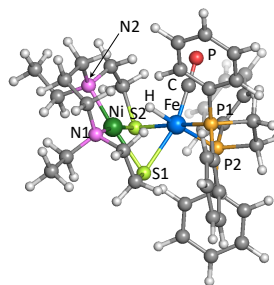

|         | calc. |      | X-ray |
|---------|-------|------|-------|
| Ni-Fe   | 3.23  | 0.04 | 3.27  |
| Ni-N1   | 2.08  | 0.05 | 2.03  |
| Ni-N2   | 2.07  | 0.05 | 2.02  |
| Ni-S1   | 2.22  | 0.06 | 2.16  |
| Ni-S2   | 2.18  | 0.00 | 2.18  |
| Fe-S1   | 2.40  | 0.09 | 2.31  |
| Fe-S2   | 2.33  | 0.00 | 2.33  |
| Fe-P1   | 2.25  | 0.01 | 2.24  |
| Fe-P2   | 2.24  | 0.00 | 2.24  |
| Fe-C(O) | 1.73  | 0.04 | 1.77  |
| Fe-Cl   | 2.41  | 0.04 | 2.37  |
| C-O     | 1.17  | 0.03 | 1.14  |

|         | calc. |      | X-ray |
|---------|-------|------|-------|
| Ni-Fe   | 2.61  | 0.08 | 2.69  |
| Ni-N1   | 2.02  | 0.02 | 2.00  |
| Ni-N2   | 2.02  | 0.03 | 1.99  |
| Ni-S1   | 2.26  | 0.09 | 2.17  |
| Ni-S2   | 2.23  | 0.03 | 2.20  |
| Fe-S1   | 2.42  | 0.08 | 2.34  |
| Fe-S2   | 2.36  | 0.01 | 2.37  |
| Fe-P1   | 2.18  | 0.00 | 2.18  |
| Fe-P2   | 2.26  | 0.00 | 2.26  |
| Fe-C(O) | 1.71  | 0.03 | 1.74  |
| Ni-H    | 1.78  | 0.26 | 2.04  |
| Fe-H    | 1.56  | 0.09 | 1.47  |
| C-O     | 1.18  | 0.02 | 1.16  |

**Fig. S1.** Key geometrical parameters of (a) complex **1** and (b) complex **5** in the optimised geometries.

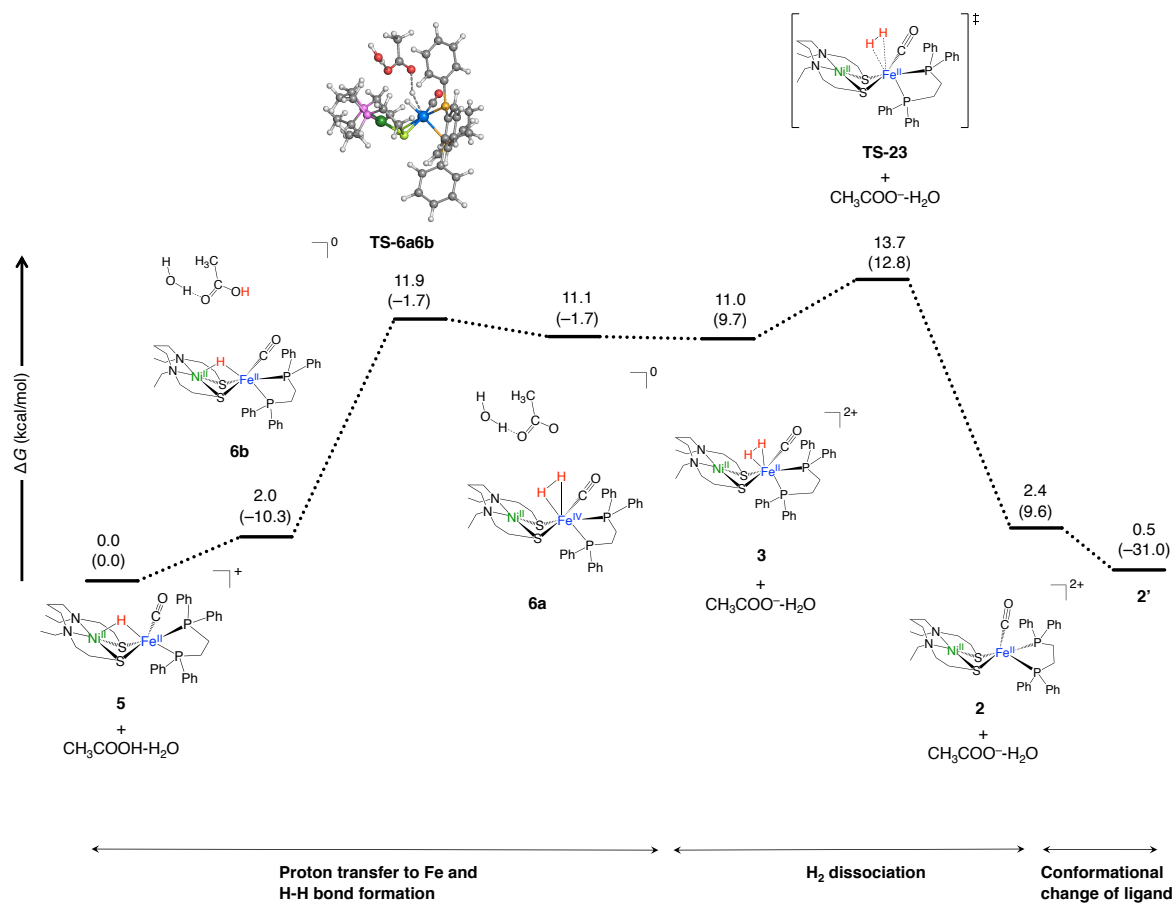

**Figure S2.** Free energy profile of H<sub>2</sub> evolution reaction by NiFe complex.

**Table S1.** Imaginary frequencies ( $\text{cm}^{-1}$ ) of optimized transition states

| label          | frequency |
|----------------|-----------|
| <b>TS-23</b>   | 382.7     |
| <b>TS-4a4b</b> | 108.0     |
| <b>TS-6a6b</b> | 467.6     |
| <b>TS-7a7b</b> | 766.9     |
| <b>TS-8a8b</b> | 521.5     |
| <b>TS-9a9b</b> | 645.7     |

**Table S2.** Total electronic energy ( $E_{\text{SCF}}$ ), thermal correction to enthalpy ( $H_{\text{corr}}$ ), and thermal correction to free energy ( $G_{\text{corr}}$ ). All are given in a.u.

| label               | $E_{\text{SCF}}$ | $H_{\text{corr}}$ | $G_{\text{corr}}$ | $\langle S^2 \rangle$ |
|---------------------|------------------|-------------------|-------------------|-----------------------|
| <b>1</b>            | -3897.1897955    | 0.8209080         | 0.6892940         | 0.00                  |
| <b>15</b>           | -3437.4782314    | 0.8246150         | 0.6943480         | 0.11                  |
| <b>2</b>            | -3436.7390529    | 0.8183330         | 0.6905500         | 0.00                  |
| <b>3</b>            | -3437.9179454    | 0.8355720         | 0.7064350         | 0.00                  |
| <b>31</b>           | -3897.1631226    | 0.8197980         | 0.6863720         | 2.01                  |
| <b>35</b>           | -3437.4718117    | 0.8243590         | 0.6932460         | 2.02                  |
| <b>35(Ni-H2O-X)</b> | -3973.6426546    | 0.8458280         | 0.7088430         | 2.00                  |
| <b>4a</b>           | -4234.4225967    | 0.9202760         | 0.7690930         | 0.00                  |
| <b>4b</b>           | -4234.4376760    | 0.9215130         | 0.7677840         | 0.00                  |
| <b>5</b>            | -3437.4782314    | 0.8246150         | 0.6943480         | 0.11                  |
| <b>51</b>           | -3897.1257335    | 0.8195910         | 0.6829450         | 6.06                  |
| <b>55</b>           | -3437.4179964    | 0.8229840         | 0.6895190         | 6.07                  |
| <b>55(Ni-H2O-X)</b> | -3973.6110521    | 0.8456990         | 0.7042650         | 6.07                  |
| <b>55(Ni-H2O-Y)</b> | -3973.6231712    | 0.8460670         | 0.7060840         | 6.06                  |
| <b>6a</b>           | -3743.1642504    | 0.9158190         | 0.7659510         | 0.00                  |
| <b>6b</b>           | -3743.1794097    | 0.9171740         | 0.7666020         | 0.00                  |
| <b>71</b>           | -3897.0925729    | 0.8179900         | 0.6754770         | 12.05                 |
| <b>75</b>           | -3437.3686167    | 0.8217470         | 0.6833320         | 12.06                 |
| <b>75(Ni-H2O-X)</b> | -3973.5836375    | 0.8452880         | 0.7017410         | 12.06                 |
| <b>75(Ni-H2O-Y)</b> | -3973.5922735    | 0.8444260         | 0.6981190         | 12.06                 |
| <b>7a</b>           | -4234.4132436    | 0.9207230         | 0.7674150         | 0.00                  |
| <b>7b</b>           | -4234.4295300    | 0.9218870         | 0.7648650         | 0.00                  |
| <b>8a</b>           | -3667.3774844    | 0.9174290         | 0.7733480         | 0.00                  |
| <b>8b</b>           | -3667.3719187    | 0.9151970         | 0.7706770         | 0.00                  |
| <b>9a</b>           | -3974.8509717    | 0.8646730         | 0.7275830         | 0.00                  |
| <b>9b</b>           | -3974.8443979    | 0.8618810         | 0.7225820         | 0.00                  |
| <b>Cl</b>           | -460.4240768     | 0.0023600         | -0.0150230        | 0.00                  |
| <b>H2</b>           | -1.1748220       | 0.0130320         | -0.0018220        | 0.00                  |
| <b>H2O</b>          | -76.4755123      | 0.0242290         | 0.0027470         | 0.00                  |
| <b>H2PO4</b>        | -796.9341527     | 0.0949950         | 0.0455320         | 0.00                  |
| <b>HPO4</b>         | -796.4669627     | 0.0827360         | 0.0359680         | 0.00                  |
| <b>NiFeSH</b>       | -3437.1388471    | 0.8286030         | 0.7010180         | 0.00                  |
| <b>NiFeSH-H</b>     | -3437.8949406    | 0.8342360         | 0.7040620         | 0.00                  |

**Table S2 (Continue).** Total electronic energy ( $E_{\text{SCF}}$ ), thermal correction to enthalpy ( $H_{\text{corr}}$ ), and thermal correction to free energy ( $G_{\text{corr}}$ ). All are given in a.u.

| label          | $E_{\text{SCF}}$ | $H_{\text{corr}}$ | $G_{\text{corr}}$ | $\langle S^2 \rangle$ |
|----------------|------------------|-------------------|-------------------|-----------------------|
| <b>NiFe-OH</b> | -3512.7527141    | 0.8320850         | 0.7005720         | 0.00                  |
| <b>OH</b>      | -75.9742634      | 0.0113790         | -0.0082110        | 0.00                  |
| <b>TS-23</b>   | -3437.9086835    | 0.8311430         | 0.7015710         | 0.00                  |
| <b>TS-4a4b</b> | -4234.4219852    | 0.9186120         | 0.7693810         | 0.00                  |
| <b>TS-6a6b</b> | -3743.1612580    | 0.9127450         | 0.7641500         | 0.00                  |
| <b>TS-7a7b</b> | -4234.4077183    | 0.9172080         | 0.7655550         | 0.00                  |
| <b>TS-8a8b</b> | -3667.3653792    | 0.9125190         | 0.7687670         | 0.00                  |
| <b>TS-9a9b</b> | -3974.8410658    | 0.8607440         | 0.7244550         | 0.00                  |

## XYZ coordinate

<sup>1</sup>

|    |           |           |           |
|----|-----------|-----------|-----------|
| Ni | 2.524059  | -0.112176 | -0.181659 |
| Fe | -0.692381 | 0.131543  | -0.416119 |
| S  | 0.899669  | -0.416978 | 1.300481  |
| S  | 1.179431  | 1.417400  | -0.957015 |
| P  | -2.437166 | -1.059534 | 0.363464  |
| P  | -1.384895 | 1.796103  | 0.919036  |
| O  | -2.178828 | 1.005471  | -2.750161 |
| N  | 3.523450  | -1.759278 | 0.612651  |
| N  | 3.719554  | 0.163065  | -1.851412 |
| C  | -1.600536 | 0.666966  | -1.785158 |
| C  | -3.445680 | 0.059207  | 1.470916  |
| H  | -4.149450 | 0.589344  | 0.794492  |
| H  | -4.046394 | -0.531862 | 2.190654  |
| C  | -2.519784 | 1.049641  | 2.179611  |
| H  | -1.863684 | 0.526202  | 2.903981  |
| H  | -3.070569 | 1.829808  | 2.742474  |
| C  | -2.040567 | -2.547308 | 1.373538  |
| C  | -2.021524 | -2.520600 | 2.785435  |
| H  | -2.304216 | -1.614164 | 3.340639  |
| C  | -1.627893 | -3.662949 | 3.505992  |
| H  | -1.615426 | -3.632305 | 4.606897  |
| C  | -1.250038 | -4.835452 | 2.826864  |
| H  | -0.938742 | -5.726480 | 3.394518  |
| C  | -1.274044 | -4.866543 | 1.419783  |
| H  | -0.980693 | -5.781629 | 0.881461  |
| C  | -1.666382 | -3.730049 | 0.694918  |
| H  | -1.659152 | -3.750184 | -0.405806 |
| C  | -3.693932 | -1.730462 | -0.815103 |
| C  | -5.001954 | -2.006970 | -0.351479 |
| H  | -5.275487 | -1.825954 | 0.699466  |
| C  | -5.967454 | -2.526720 | -1.229800 |
| H  | -6.984059 | -2.734058 | -0.859768 |
| C  | -5.637286 | -2.784086 | -2.573741 |
| H  | -6.396156 | -3.191896 | -3.260201 |
| C  | -4.334776 | -2.524090 | -3.034118 |
| H  | -4.066368 | -2.730729 | -4.082349 |
| C  | -3.365015 | -1.999413 | -2.160675 |
| H  | -2.339156 | -1.818385 | -2.515368 |
| C  | -2.348018 | 3.116993  | 0.063510  |
| C  | -1.823966 | 3.677789  | -1.125546 |
| H  | -0.864716 | 3.318599  | -1.530662 |
| C  | -2.522104 | 4.690027  | -1.803274 |
| H  | -2.097399 | 5.120837  | -2.723451 |
| C  | -3.761344 | 5.141651  | -1.313953 |
| H  | -4.313773 | 5.929146  | -1.850289 |
| C  | -4.293894 | 4.580649  | -0.139807 |
| H  | -5.265745 | 4.925472  | 0.247049  |
| C  | -3.591003 | 3.577345  | 0.551265  |
| H  | -4.026592 | 3.160685  | 1.471434  |
| C  | -0.119728 | 2.725722  | 1.894046  |
| C  | 0.293087  | 2.259612  | 3.164267  |
| H  | -0.184944 | 1.384371  | 3.626080  |
| C  | 1.328762  | 2.909579  | 3.857668  |
| H  | 1.634596  | 2.536568  | 4.847759  |
| C  | 1.971029  | 4.024974  | 3.291562  |
| H  | 2.785728  | 4.529435  | 3.834585  |
| C  | 1.562287  | 4.497533  | 2.031285  |
| H  | 2.051755  | 5.376255  | 1.582712  |
| C  | 0.524287  | 3.854499  | 1.336224  |
| H  | 0.217810  | 4.246252  | 0.355705  |

|               |           |           |           |
|---------------|-----------|-----------|-----------|
| C             | 1.198835  | -2.223043 | 1.444899  |
| H             | 0.612749  | -2.623273 | 2.294649  |
| H             | 0.862467  | -2.706739 | 0.507876  |
| C             | 2.680734  | -2.373884 | 1.702857  |
| H             | 2.960569  | -3.445904 | 1.809528  |
| H             | 2.935697  | -1.870549 | 2.655206  |
| C             | 4.865363  | -1.459681 | 1.215232  |
| H             | 5.611782  | -1.407381 | 0.402208  |
| H             | 5.165017  | -2.330761 | 1.840823  |
| C             | 4.879067  | -0.168669 | 2.026268  |
| H             | 5.895775  | 0.008574  | 2.431787  |
| H             | 4.596448  | 0.697994  | 1.392289  |
| H             | 4.172048  | -0.203152 | 2.879300  |
| C             | 3.627234  | -2.760290 | -0.498238 |
| H             | 2.586448  | -3.022904 | -0.778864 |
| H             | 4.111842  | -3.677674 | -0.092549 |
| C             | 4.374157  | -2.306845 | -1.751077 |
| H             | 5.440238  | -2.085387 | -1.537199 |
| H             | 4.392483  | -3.184670 | -2.430423 |
| C             | 3.722713  | -1.171528 | -2.533894 |
| H             | 4.227533  | -1.066824 | -3.519381 |
| H             | 2.659810  | -1.423703 | -2.730911 |
| C             | 5.086190  | 0.653999  | -1.470982 |
| H             | 5.492887  | -0.026709 | -0.707619 |
| H             | 4.926034  | 1.626956  | -0.965508 |
| C             | 6.093565  | 0.791366  | -2.613840 |
| H             | 7.044051  | 1.183650  | -2.197874 |
| H             | 6.317708  | -0.183998 | -3.091297 |
| H             | 5.756562  | 1.496630  | -3.399815 |
| C             | 3.102140  | 1.172333  | -2.791764 |
| H             | 3.459610  | 0.983096  | -3.826829 |
| H             | 3.467371  | 2.174096  | -2.489331 |
| C             | 1.589954  | 1.147878  | -2.729430 |
| H             | 1.154925  | 0.177142  | -3.039006 |
| H             | 1.143373  | 1.962678  | -3.334740 |
| Cl            | 0.054569  | -1.752139 | -1.717925 |
| <sup>15</sup> |           |           |           |
| Ni            | 1.598365  | -1.260633 | -0.913111 |
| Fe            | -0.405536 | -0.164061 | 0.348129  |
| S             | 0.196866  | 0.148448  | -1.979476 |
| S             | -0.336596 | -2.327336 | -0.597157 |
| P             | -0.316589 | 1.882731  | 1.090693  |
| P             | -2.645202 | 0.091468  | 0.221644  |
| O             | -0.460269 | -1.073133 | 3.095046  |
| N             | 3.169891  | -0.107826 | -1.426513 |
| N             | 2.548810  | -2.714637 | 0.110844  |
| C             | -0.461435 | -0.700793 | 1.972014  |
| C             | -1.950389 | 2.201651  | 1.960110  |
| H             | -1.867559 | 1.647606  | 2.919375  |
| H             | -2.067668 | 3.279651  | 2.190770  |
| C             | -3.119683 | 1.679919  | 1.112840  |
| H             | -3.379139 | 2.418118  | 0.328216  |
| H             | -4.032682 | 1.526026  | 1.722391  |
| C             | -0.160044 | 3.264170  | -0.125737 |
| C             | -1.106770 | 3.365697  | -1.174041 |
| H             | -1.929763 | 2.641231  | -1.263067 |
| C             | -0.979339 | 4.364756  | -2.152523 |
| H             | -1.724565 | 4.430770  | -2.960745 |
| C             | 0.106931  | 5.259814  | -2.114911 |
| H             | 0.212860  | 6.034067  | -2.890990 |
| C             | 1.062701  | 5.150923  | -1.089750 |
| H             | 1.923073  | 5.838009  | -1.059577 |

|   |           |           |           |    |           |           |           |
|---|-----------|-----------|-----------|----|-----------|-----------|-----------|
| C | 0.930247  | 4.161825  | -0.097694 | H  | 4.520558  | -4.872337 | 0.047393  |
| H | 1.692316  | 4.084217  | 0.692456  | H  | 2.899339  | -5.566307 | 0.408943  |
| C | 0.946554  | 2.272332  | 2.376986  | C  | 1.597501  | -3.171183 | 1.181045  |
| C | 0.815410  | 3.405236  | 3.213059  | H  | 1.482227  | -2.310813 | 1.865202  |
| H | -0.048230 | 4.079913  | 3.105076  | H  | 2.051751  | -4.001253 | 1.766302  |
| C | 1.797307  | 3.685434  | 4.178839  | C  | 0.242280  | -3.572450 | 0.638455  |
| H | 1.687504  | 4.568516  | 4.828026  | H  | -0.501353 | -3.630893 | 1.458910  |
| C | 2.918611  | 2.844584  | 4.314837  | H  | 0.262336  | -4.553456 | 0.121782  |
| H | 3.686982  | 3.069289  | 5.071476  | H  | 1.142969  | -0.301176 | 0.510214  |
| C | 3.054291  | 1.717609  | 3.484251  | 2  |           |           |           |
| H | 3.927671  | 1.053754  | 3.584003  | Ni | 2.484791  | 0.020980  | -0.957315 |
| C | 2.070317  | 1.430780  | 2.522500  | Fe | -0.474481 | 0.066843  | 0.053637  |
| H | 2.159376  | 0.543462  | 1.874400  | S  | 0.860530  | 1.485692  | -1.178962 |
| C | -3.591236 | 0.134229  | -1.363771 | S  | 0.821154  | -1.403212 | -1.194633 |
| C | -3.139283 | -0.671581 | -2.434333 | P  | -1.878072 | 1.558220  | 0.914842  |
| H | -2.241985 | -1.295749 | -2.308312 | P  | -1.976520 | -1.417355 | 0.798944  |
| C | -3.829396 | -0.682884 | -3.659102 | O  | 1.084606  | 0.000225  | 2.459717  |
| H | -3.466871 | -1.318143 | -4.482773 | N  | 3.789931  | 1.591889  | -0.510984 |
| C | -4.971233 | 0.119454  | -3.833067 | N  | 3.734223  | -1.546283 | -0.477080 |
| H | -5.508013 | 0.117197  | -4.794928 | C  | 0.442205  | 0.020954  | 1.474311  |
| C | -5.427387 | 0.924253  | -2.772373 | C  | -2.637156 | 0.807758  | 2.430958  |
| H | -6.324983 | 1.550098  | -2.899922 | H  | -1.860531 | 0.937375  | 3.212085  |
| C | -4.746525 | 0.930015  | -1.542287 | H  | -3.524205 | 1.396384  | 2.740108  |
| H | -5.131287 | 1.554515  | -0.721411 | C  | -2.950743 | -0.685989 | 2.229873  |
| C | -3.461519 | -1.272664 | 1.159567  | H  | -4.022658 | -0.853027 | 2.007037  |
| C | -3.711967 | -2.509881 | 0.521350  | H  | -2.703758 | -1.269217 | 3.137853  |
| H | -3.553611 | -2.616659 | -0.562946 | C  | -3.179984 | 1.750743  | -0.359777 |
| C | -4.164164 | -3.613090 | 1.265242  | C  | -4.524766 | 1.392252  | -0.114855 |
| H | -4.357990 | -4.570036 | 0.754886  | H  | -4.857063 | 1.090344  | 0.889020  |
| C | -4.371147 | -3.497200 | 2.652840  | C  | -5.453567 | 1.403893  | -1.168904 |
| H | -4.725342 | -4.363078 | 3.234222  | H  | -6.496750 | 1.110277  | -0.974993 |
| C | -4.123259 | -2.269220 | 3.292661  | C  | -5.054367 | 1.780547  | -2.464109 |
| H | -4.282516 | -2.168801 | 4.378170  | H  | -5.785289 | 1.777446  | -3.287599 |
| C | -3.666623 | -1.163033 | 2.553883  | C  | -3.719098 | 2.149403  | -2.709405 |
| H | -3.456028 | -0.217775 | 3.078219  | H  | -3.400548 | 2.441065  | -3.722093 |
| C | 1.456308  | 1.441853  | -2.369342 | C  | -2.780751 | 2.121720  | -1.666793 |
| H | 1.721628  | 1.301876  | -3.436843 | H  | -1.728462 | 2.376267  | -1.869000 |
| H | 1.006699  | 2.446524  | -2.271247 | C  | -1.280524 | 3.216760  | 1.403830  |
| C | 2.648926  | 1.300201  | -1.456469 | C  | -1.600986 | 4.370497  | 0.656106  |
| H | 3.460987  | 2.004602  | -1.744624 | H  | -2.297597 | 4.310727  | -0.193589 |
| H | 2.348558  | 1.544458  | -0.417953 | C  | -1.021270 | 5.606360  | 0.992163  |
| C | 3.586790  | -0.603046 | -2.787958 | H  | -1.272996 | 6.501715  | 0.402570  |
| H | 2.667045  | -0.698355 | -3.396781 | C  | -0.126941 | 5.699880  | 2.073403  |
| H | 3.959971  | -1.634428 | -2.645801 | H  | 0.329534  | 6.668792  | 2.329599  |
| C | 4.628866  | 0.236072  | -3.529717 | C  | 0.182645  | 4.553467  | 2.828795  |
| H | 4.849943  | -0.259214 | -4.497216 | H  | 0.881414  | 4.620340  | 3.677138  |
| H | 4.263145  | 1.258213  | -3.755230 | C  | -0.386409 | 3.314139  | 2.496413  |
| H | 5.584369  | 0.319451  | -2.973738 | H  | -0.108163 | 2.420985  | 3.077571  |
| C | 4.304725  | -0.123584 | -0.456098 | C  | -1.365786 | -3.043500 | 1.370305  |
| H | 3.951800  | 0.418199  | 0.444109  | C  | -1.512749 | -4.202200 | 0.578080  |
| H | 5.144676  | 0.469496  | -0.877922 | H  | -2.091982 | -4.166570 | -0.357456 |
| C | 4.789178  | -1.506183 | -0.039676 | C  | -0.902333 | -5.403844 | 0.978618  |
| H | 5.698676  | -1.359394 | 0.578639  | H  | -1.017995 | -6.305625 | 0.357340  |
| H | 5.113084  | -2.113986 | -0.909419 | C  | -0.142073 | -5.452642 | 2.160951  |
| C | 3.774259  | -2.242686 | 0.822793  | H  | 0.341617  | -6.393589 | 2.466696  |
| H | 4.250541  | -3.110242 | 1.328387  | C  | 0.000465  | -4.298084 | 2.954118  |
| C | 3.421352  | -1.558893 | 1.621861  | H  | 0.595263  | -4.332008 | 3.880165  |
| C | 2.844221  | -3.792323 | -0.898662 | C  | -0.607640 | -3.094838 | 2.562824  |
| H | 3.474838  | -3.331305 | -1.682461 | H  | -0.472768 | -2.189703 | 3.176285  |
| H | 1.885156  | -4.039088 | -1.393244 | C  | -3.200969 | -1.754070 | -0.528059 |
| C | 3.510183  | -5.062356 | -0.367284 | C  | -2.948031 | -1.292077 | -1.837193 |
| H | 3.626429  | -5.772929 | -1.210987 | H  | -2.010908 | -0.760926 | -2.066557 |



C -3.907744 -1.477117 -2.846269  
 H -3.712690 -1.095153 -3.859932  
 C -5.117622 -2.130975 -2.553555  
 H -5.873420 -2.268551 -3.342602  
 C -5.366292 -2.606483 -1.251815  
 H -6.311199 -3.123789 -1.022906  
 C -4.412762 -2.420173 -0.237849  
 H -4.612395 -2.794661 0.779019  
 C 1.609655 2.791610 -0.112099  
 H 1.060916 3.743613 -0.255264  
 H 1.508513 2.483638 0.943711  
 C 3.048171 2.908889 -0.557027  
 H 3.593845 3.647871 0.070445  
 H 3.076456 3.274637 -1.601028  
 C 4.964028 1.739845 -1.437248  
 H 5.738534 1.011207 -1.140416  
 H 5.414147 2.742046 -1.259189  
 C 4.591351 1.555284 -2.903642  
 H 5.498433 1.647321 -3.534162  
 H 4.145876 0.552987 -3.075249  
 H 3.858223 2.312037 -3.247784  
 C 4.223956 1.335771 0.902333  
 H 3.309251 1.375846 1.528642  
 H 4.884503 2.175071 1.217660  
 C 4.942479 0.009157 1.156918  
 H 5.904435 -0.044158 0.606566  
 H 5.225574 0.019363 2.230102  
 C 4.121391 -1.261741 0.944783  
 H 4.687971 -2.133125 1.339797  
 H 3.179151 -1.196671 1.525868  
 C 4.906279 -1.654634 -1.411420  
 H 5.405484 -0.675612 -1.446964  
 H 4.473565 -1.824131 -2.416882  
 C 5.939207 -2.730853 -1.073188  
 H 6.735850 -2.699194 -1.844199  
 H 6.421075 -2.552258 -0.090747  
 H 5.513124 -3.753865 -1.075509  
 C 2.984644 -2.856049 -0.536333  
 H 3.496411 -3.605811 0.104365  
 H 3.037678 -3.214116 -1.583406  
 C 1.538617 -2.723945 -0.119521  
 H 1.416786 -2.432391 0.939528  
 H 0.988935 -3.670544 -0.286233  
 3  
 Ni 2.423435 -0.370334 -0.381294  
 Fe -0.815132 0.110147 -0.527632  
 S 0.736617 -0.882184 0.956621  
 S 1.139204 1.252826 -1.039153  
 P -2.649579 -0.925122 0.266793  
 P -1.179172 1.688811 1.084753  
 O -2.372143 1.523372 -2.545597  
 N 3.392960 -2.081536 0.279687  
 N 3.735081 0.162806 -1.885620  
 C -1.758684 0.967728 -1.720865  
 C -3.434895 0.169060 1.553281  
 H -4.099669 0.857132 0.989387  
 H -4.062090 -0.436458 2.237835  
 C -2.353717 0.946243 2.306984  
 H -1.749274 0.273309 2.946675  
 H -2.776480 1.727200 2.969829  
 C -2.338365 -2.553943 1.059865  
 C -2.126870 -2.679732 2.450524

H -2.208665 -1.810226 3.118636  
 C -1.802240 -3.933613 2.999132  
 H -1.637084 -4.023997 4.084071  
 C -1.688105 -5.063915 2.169567  
 H -1.431826 -6.042865 2.603826  
 C -1.901889 -4.940518 0.783709  
 H -1.815144 -5.821645 0.129079  
 C -2.220600 -3.691109 0.228068  
 H -2.375032 -3.601986 -0.859217  
 C -3.984919 -1.302105 -0.940944  
 C -5.318535 -1.441775 -0.491536  
 H -5.571579 -1.302932 0.570862  
 C -6.335949 -1.768872 -1.403133  
 H -7.372963 -1.870739 -1.046642  
 C -6.032431 -1.968900 -2.762805  
 H -6.833032 -2.226038 -3.474033  
 C -4.706139 -1.841274 -3.210907  
 H -4.461449 -1.999161 -4.272906  
 C -3.683931 -1.506673 -2.305479  
 H -2.650603 -1.407584 -2.670285  
 C -1.947898 3.241746 0.466870  
 C -1.402800 3.871876 -0.676834  
 H -0.534958 3.432322 -1.192983  
 C -1.967427 5.058506 -1.170185  
 H -1.528749 5.540223 -2.057802  
 C -3.092463 5.619863 -0.539657  
 H -3.541024 6.545862 -0.932206  
 C -3.645941 4.991903 0.589990  
 H -4.530026 5.422496 1.085642  
 C -3.076854 3.810508 1.097280  
 H -3.526155 3.341558 1.984828  
 C 0.316704 2.201783 2.029101  
 C 0.765049 1.433222 3.130390  
 H 0.161183 0.605425 3.527461  
 C 2.004972 1.711157 3.729227  
 H 2.341434 1.102201 4.582363  
 C 2.814624 2.748937 3.235873  
 H 3.793239 2.953177 3.697658  
 C 2.364665 3.531733 2.157643  
 H 2.983114 4.358962 1.775969  
 C 1.123067 3.264444 1.557620  
 H 0.790916 3.892127 0.718386  
 C 0.987089 -2.686023 0.668577  
 H 0.298829 -3.262391 1.314924  
 H 0.789182 -2.937946 -0.391753  
 C 2.425365 -2.918362 1.085168  
 H 2.704001 -3.989881 0.989836  
 H 2.535277 -2.648533 2.153480  
 C 4.566541 -1.747783 1.156746  
 H 5.416563 -1.483409 0.501104  
 H 4.867348 -2.673584 1.696864  
 C 4.282234 -0.604591 2.126150  
 H 5.170631 -0.428491 2.765826  
 H 4.053743 0.335935 1.581088  
 H 3.419836 -0.818824 2.788244  
 C 3.808004 -2.904350 -0.902607  
 H 2.872380 -3.243602 -1.393599  
 H 4.331997 -3.809416 -0.520831  
 C 4.685923 -2.209865 -1.937136  
 H 5.657221 -1.892314 -1.505164  
 H 4.942306 -2.980940 -2.693118  
 C 4.020431 -1.067263 -2.691358

|                  |           |           |           |                  |           |           |           |
|------------------|-----------|-----------|-----------|------------------|-----------|-----------|-----------|
| H                | 4.654430  | -0.781022 | -3.558286 | H                | -4.916761 | 5.301283  | -2.260793 |
| H                | 3.045866  | -1.406848 | -3.100823 | C                | -4.815072 | 4.027909  | -0.496528 |
| C                | 4.954028  | 0.779110  | -1.256302 | H                | -5.847124 | 4.245236  | -0.179224 |
| H                | 5.335366  | 0.084526  | -0.488936 | C                | -4.024089 | 3.157389  | 0.274486  |
| H                | 4.586476  | 1.670621  | -0.709936 | H                | -4.455178 | 2.715142  | 1.184614  |
| C                | 6.082631  | 1.151609  | -2.218047 | C                | -0.565457 | 2.846943  | 1.857134  |
| H                | 6.888802  | 1.646014  | -1.638646 | C                | -0.214963 | 2.516398  | 3.187188  |
| H                | 6.523511  | 0.260397  | -2.708509 | H                | -0.609468 | 1.609414  | 3.666053  |
| H                | 5.753761  | 1.858811  | -3.006005 | C                | 0.653243  | 3.345604  | 3.918625  |
| C                | 3.097292  | 1.178298  | -2.812504 | H                | 0.911579  | 3.078490  | 4.955379  |
| H                | 3.511429  | 1.064234  | -3.835863 | C                | 1.189037  | 4.505784  | 3.332063  |
| H                | 3.374515  | 2.188969  | -2.452856 | H                | 1.871337  | 5.151861  | 3.906710  |
| C                | 1.587265  | 1.048181  | -2.816948 | C                | 0.844515  | 4.840308  | 2.010007  |
| H                | 1.239114  | 0.062171  | -3.183515 | H                | 1.252816  | 5.750461  | 1.543292  |
| H                | 1.102900  | 1.847116  | -3.413857 | C                | -0.027089 | 4.018604  | 1.275737  |
| H                | -0.814563 | -1.317972 | -1.324216 | H                | -0.287483 | 4.303484  | 0.246494  |
| H                | -0.180158 | -0.859384 | -1.680712 | C                | 1.294414  | -2.011373 | 1.754846  |
| <sup>31</sup> Ni | 2.374617  | -0.032080 | -0.215699 | H                | 0.829101  | -2.428817 | 2.668969  |
| Fe               | -0.610889 | 0.121872  | -0.332068 | H                | 0.903451  | -2.560160 | 0.880470  |
| S                | 0.826525  | -0.230838 | 1.587007  | C                | 2.805361  | -2.131862 | 1.864650  |
| S                | 1.042027  | 1.704797  | -1.010682 | H                | 3.089953  | -3.204881 | 1.953613  |
| P                | -2.239027 | -1.272714 | 0.350846  | H                | 3.127563  | -1.640531 | 2.802689  |
| P                | -1.623560 | 1.717766  | 0.851077  | C                | 4.848833  | -0.968267 | 1.324616  |
| O                | -2.079981 | 0.671747  | -2.773963 | H                | 5.599140  | -0.869067 | 0.519814  |
| N                | 3.583793  | -1.512773 | 0.733868  | H                | 5.267348  | -1.725124 | 2.027391  |
| N                | 3.654800  | 0.311628  | -1.928311 | C                | 4.650736  | 0.372596  | 2.024365  |
| C                | -1.501867 | 0.458524  | -1.773582 | H                | 5.619373  | 0.735140  | 2.424145  |
| C                | -3.476385 | -0.256109 | 1.312794  | H                | 4.263587  | 1.142509  | 1.322563  |
| H                | -4.173873 | 0.162692  | 0.556621  | H                | 3.934806  | 0.304058  | 2.867848  |
| H                | -4.062603 | -0.897539 | 2.000608  | C                | 3.871823  | -2.539179 | -0.316960 |
| C                | -2.743785 | 0.864832  | 2.056552  | H                | 2.897082  | -2.983395 | -0.600297 |
| H                | -2.081399 | 0.448997  | 2.841921  | H                | 4.483517  | -3.351729 | 0.141001  |
| H                | -3.434226 | 1.578391  | 2.548857  | C                | 4.599050  | -2.045805 | -1.578924 |
| C                | -1.810808 | -2.688235 | 1.448643  | H                | 5.616687  | -1.681347 | -1.325616 |
| C                | -1.862385 | -2.578224 | 2.855757  | H                | 4.771174  | -2.955141 | -2.192969 |
| H                | -2.216708 | -1.655532 | 3.338523  | C                | 3.894514  | -1.045000 | -2.505850 |
| C                | -1.443761 | -3.651258 | 3.662140  | H                | 4.497283  | -0.948835 | -3.437699 |
| H                | -1.488116 | -3.555752 | 4.758436  | H                | 2.904543  | -1.440337 | -2.806945 |
| C                | -0.965857 | -4.836571 | 3.074123  | C                | 4.911444  | 0.993930  | -1.483352 |
| H                | -0.634047 | -5.673205 | 3.708900  | H                | 5.352876  | 0.406773  | -0.663227 |
| C                | -0.915991 | -4.950725 | 1.672539  | H                | 4.591470  | 1.956546  | -1.036138 |
| H                | -0.545934 | -5.876763 | 1.205139  | C                | 5.974948  | 1.220374  | -2.560908 |
| C                | -1.337274 | -3.883952 | 0.862144  | H                | 6.815043  | 1.793851  | -2.118174 |
| H                | -1.286472 | -3.979372 | -0.233824 | H                | 6.389677  | 0.264498  | -2.941060 |
| C                | -3.241688 | -2.111638 | -0.951912 | H                | 5.591489  | 1.799761  | -3.425229 |
| C                | -4.592706 | -2.450214 | -0.709207 | C                | 2.964484  | 1.205537  | -2.924063 |
| H                | -5.071166 | -2.200405 | 0.250253  | H                | 3.214188  | 0.882191  | -3.958537 |
| C                | -5.339111 | -3.120001 | -1.693613 | H                | 3.379841  | 2.224873  | -2.799962 |
| H                | -6.393175 | -3.373345 | -1.498473 | C                | 1.450544  | 1.283127  | -2.766706 |
| C                | -4.743469 | -3.468944 | -2.920117 | H                | 0.966124  | 0.319416  | -3.009809 |
| H                | -5.330936 | -3.995337 | -3.688889 | H                | 1.043086  | 2.066345  | -3.437331 |
| C                | -3.396465 | -3.144950 | -3.160555 | Cl               | 0.737879  | -1.557125 | -1.364761 |
| H                | -2.922427 | -3.418075 | -4.116501 | <sup>35</sup> Ni | 1.534050  | -1.229280 | -0.996617 |
| C                | -2.647859 | -2.465940 | -2.183125 | Fe               | -0.392639 | -0.197767 | 0.253172  |
| H                | -1.594072 | -2.214086 | -2.377339 | S                | 0.120825  | 0.366017  | -2.038093 |
| C                | -2.701298 | 2.859666  | -0.122181 | S                | -0.499467 | -2.347627 | -0.719232 |
| C                | -2.188311 | 3.447251  | -1.302903 | P                | -0.208416 | 1.815048  | 1.140089  |
| H                | -1.164844 | 3.208684  | -1.634483 | P                | -2.622948 | 0.139974  | 0.252970  |
| C                | -2.977185 | 4.327427  | -2.060898 | O                | -0.457969 | -1.228016 | 2.962901  |
| H                | -2.560652 | 4.781391  | -2.973722 | N                | 3.186593  | -0.048121 | -1.446241 |
| C                | -4.294390 | 4.618201  | -1.661530 | N                | 2.469008  | -2.808685 | 0.013448  |

|   |           |           |           |                          |           |           |           |
|---|-----------|-----------|-----------|--------------------------|-----------|-----------|-----------|
| C | -0.454533 | -0.823297 | 1.855312  | H                        | 4.275931  | 1.368478  | -3.741781 |
| C | -1.807063 | 2.120139  | 2.074275  | H                        | 5.577750  | 0.371690  | -3.004424 |
| H | -1.723734 | 1.500598  | 2.992406  | C                        | 4.308581  | -0.176795 | -0.474359 |
| H | -1.876827 | 3.182879  | 2.381210  | H                        | 3.980051  | 0.334385  | 0.452894  |
| C | -3.011573 | 1.701345  | 1.222247  | H                        | 5.189912  | 0.389321  | -0.851820 |
| H | -3.246523 | 2.487662  | 0.477955  | C                        | 4.721687  | -1.606918 | -0.126632 |
| H | -3.922041 | 1.555820  | 1.837078  | H                        | 5.648913  | -1.530198 | 0.478787  |
| C | -0.041089 | 3.291714  | 0.047791  | H                        | 5.010855  | -2.180475 | -1.031649 |
| C | -0.997604 | 3.494267  | -0.976989 | C                        | 3.705374  | -2.371485 | 0.721529  |
| H | -1.825672 | 2.785116  | -1.123785 | H                        | 4.193699  | -3.253713 | 1.194057  |
| C | -0.868410 | 4.577387  | -1.861445 | H                        | 3.369506  | -1.715959 | 1.551799  |
| H | -1.618414 | 4.723295  | -2.654612 | C                        | 2.726347  | -3.825329 | -1.054670 |
| C | 0.226299  | 5.456113  | -1.751884 | H                        | 3.397719  | -3.348474 | -1.796094 |
| H | 0.332836  | 6.296995  | -2.455141 | H                        | 1.764459  | -3.986452 | -1.583009 |
| C | 1.189236  | 5.248466  | -0.748877 | C                        | 3.310638  | -5.164532 | -0.600361 |
| H | 2.054729  | 5.924192  | -0.662820 | H                        | 3.445374  | -5.815049 | -1.488514 |
| C | 1.057709  | 4.173315  | 0.148622  | H                        | 4.302890  | -5.048900 | -0.118683 |
| H | 1.825407  | 4.017881  | 0.921587  | H                        | 2.639954  | -5.697746 | 0.103713  |
| C | 1.085689  | 2.038147  | 2.434407  | C                        | 1.493568  | -3.275512 | 1.039284  |
| C | 1.016966  | 3.105182  | 3.360488  | H                        | 1.414312  | -2.452733 | 1.772853  |
| H | 0.194610  | 3.835904  | 3.309811  | H                        | 1.895378  | -4.157930 | 1.588344  |
| C | 2.008007  | 3.245727  | 4.347124  | C                        | 0.106949  | -3.605914 | 0.492338  |
| H | 1.946932  | 4.077910  | 5.066129  | H                        | -0.609632 | -3.682722 | 1.335535  |
| C | 3.075547  | 2.329999  | 4.417151  | H                        | 0.095768  | -4.575832 | -0.046248 |
| H | 3.850394  | 2.445145  | 5.191542  | H                        | 1.184530  | -0.348746 | 0.391780  |
| C | 3.149395  | 1.268990  | 3.497076  | <sup>35</sup> (Ni-H2O-X) |           |           |           |
| H | 3.979943  | 0.546882  | 3.542421  | Ni                       | 2.369019  | -0.645562 | -0.455695 |
| C | 2.156264  | 1.122605  | 2.514197  | Fe                       | -0.896914 | 0.181636  | -0.626914 |
| H | 2.200598  | 0.286017  | 1.798947  | S                        | 0.544145  | -0.909805 | 0.998820  |
| C | -3.565583 | 0.289733  | -1.324428 | S                        | 1.152277  | 1.129312  | -1.388461 |
| C | -3.148551 | -0.473325 | -2.438405 | P                        | -2.740670 | -0.667770 | 0.342375  |
| H | -2.271482 | -1.132275 | -2.353729 | P                        | -0.935074 | 1.785951  | 0.965023  |
| C | -3.853635 | -0.401366 | -3.652079 | O                        | -2.343243 | 1.806456  | -2.547687 |
| H | -3.518684 | -1.002041 | -4.512432 | N                        | 3.377258  | -2.113856 | 0.694696  |
| C | -4.975613 | 0.438618  | -3.768471 | N                        | 3.908121  | -0.068083 | -1.802881 |
| H | -5.523629 | 0.499983  | -4.721967 | C                        | -1.774451 | 1.157935  | -1.749101 |
| C | -5.398904 | 1.197216  | -2.661421 | C                        | -3.302894 | 0.536400  | 1.651679  |
| H | -6.281525 | 1.851075  | -2.743464 | H                        | -3.920755 | 1.285472  | 1.112094  |
| C | -4.701752 | 1.122540  | -1.442561 | H                        | -3.951271 | 0.035920  | 2.398991  |
| H | -5.059198 | 1.713166  | -0.585240 | C                        | -2.079377 | 1.188255  | 2.296920  |
| C | -3.490210 | -1.223804 | 1.144205  | H                        | -1.493731 | 0.438912  | 2.865944  |
| C | -3.875715 | -2.391557 | 0.447148  | H                        | -2.343398 | 2.005664  | 2.997442  |
| H | -3.768613 | -2.444844 | -0.646982 | C                        | -2.524436 | -2.288730 | 1.193263  |
| C | -4.402032 | -3.491476 | 1.146384  | C                        | -2.343357 | -2.397338 | 2.589327  |
| H | -4.702664 | -4.394553 | 0.591762  | H                        | -2.372459 | -1.508171 | 3.236259  |
| C | -4.547145 | -3.439842 | 2.545288  | C                        | -2.119385 | -3.656515 | 3.175336  |
| H | -4.959482 | -4.303013 | 3.091243  | H                        | -1.978972 | -3.730051 | 4.265322  |
| C | -4.163959 | -2.280111 | 3.243011  | C                        | -2.076048 | -4.814277 | 2.377296  |
| H | -4.274727 | -2.230627 | 4.337858  | H                        | -1.899388 | -5.797952 | 2.840224  |
| C | -3.634856 | -1.177410 | 2.549270  | C                        | -2.259111 | -4.709607 | 0.985789  |
| H | -3.322249 | -0.287650 | 3.117405  | H                        | -2.227399 | -5.611258 | 0.353861  |
| C | 1.480184  | 1.595752  | -2.295101 | C                        | -2.480758 | -3.454892 | 0.395140  |
| H | 1.742406  | 1.511027  | -3.369867 | H                        | -2.606573 | -3.374447 | -0.695325 |
| H | 1.108376  | 2.624721  | -2.137885 | C                        | -4.289833 | -0.968193 | -0.619020 |
| C | 2.686850  | 1.355932  | -1.405890 | C                        | -5.455705 | -1.334892 | 0.095341  |
| H | 3.498886  | 2.070544  | -1.674518 | H                        | -5.419587 | -1.458916 | 1.189742  |
| H | 2.412754  | 1.560312  | -0.351575 | C                        | -6.663842 | -1.553570 | -0.585999 |
| C | 3.562403  | -0.503061 | -2.824552 | H                        | -7.566014 | -1.835568 | -0.020359 |
| H | 2.628365  | -0.545514 | -3.422378 | C                        | -6.719620 | -1.417252 | -1.986446 |
| H | 3.903676  | -1.552379 | -2.729917 | H                        | -7.667174 | -1.591543 | -2.520500 |
| C | 4.616954  | 0.329710  | -3.556563 | C                        | -5.561251 | -1.066198 | -2.700748 |
| H | 4.818155  | -0.136147 | -4.542862 | H                        | -5.595249 | -0.967797 | -3.797340 |

|    |           |           |           |    |           |           |           |
|----|-----------|-----------|-----------|----|-----------|-----------|-----------|
| C  | -4.349030 | -0.842387 | -2.021769 | H  | 0.825207  | -2.052164 | -1.946389 |
| H  | -3.444085 | -0.593529 | -2.591679 | 4a |           |           |           |
| C  | -1.607448 | 3.415101  | 0.406466  | Ni | -1.415521 | -1.871570 | 0.576177  |
| C  | -1.059336 | 4.017412  | -0.750493 | Fe | 0.794214  | 0.176693  | -0.636057 |
| H  | -0.269122 | 3.499554  | -1.318401 | S  | 0.209494  | -0.696216 | 1.514733  |
| C  | -1.529338 | 5.264211  | -1.193219 | S  | -0.018668 | -1.958763 | -1.076503 |
| H  | -1.089283 | 5.722498  | -2.092893 | P  | 1.710937  | 2.095837  | 0.078578  |
| C  | -2.564304 | 5.916974  | -0.498765 | P  | 2.898394  | -0.653303 | -0.619505 |
| H  | -2.938117 | 6.891439  | -0.850616 | O  | 1.080311  | 0.953625  | -3.424453 |
| C  | -3.123609 | 5.316759  | 0.643021  | N  | -2.633486 | -1.482911 | 2.208752  |
| H  | -3.938667 | 5.817551  | 1.188957  | N  | -2.836075 | -2.766679 | -0.630898 |
| C  | -2.646941 | 4.074306  | 1.099059  | C  | 0.991855  | 0.635285  | -2.299824 |
| H  | -3.097783 | 3.630306  | 1.998768  | C  | 3.585264  | 2.012653  | -0.100194 |
| C  | 0.607126  | 2.279202  | 1.869413  | H  | 3.930527  | 2.954897  | -0.569180 |
| C  | 0.849618  | 1.851630  | 3.194904  | H  | 4.004839  | 1.980337  | 0.923855  |
| H  | 0.129140  | 1.213148  | 3.724568  | C  | 4.017897  | 0.796251  | -0.923260 |
| C  | 2.025061  | 2.235485  | 3.862739  | H  | 5.075101  | 0.513461  | -0.742124 |
| H  | 2.194538  | 1.894951  | 4.896061  | H  | 3.903903  | 0.988200  | -2.011256 |
| C  | 2.985141  | 3.029437  | 3.212810  | C  | 1.443696  | 2.511848  | 1.850034  |
| H  | 3.911957  | 3.315858  | 3.734150  | C  | 2.127665  | 1.773143  | 2.843412  |
| C  | 2.756288  | 3.451742  | 1.891189  | H  | 2.849762  | 0.991130  | 2.562756  |
| H  | 3.499646  | 4.075635  | 1.370510  | C  | 1.867774  | 2.013756  | 4.202556  |
| C  | 1.572657  | 3.089475  | 1.226474  | H  | 2.404289  | 1.432809  | 4.968864  |
| H  | 1.410017  | 3.446390  | 0.200603  | C  | 0.918739  | 2.982893  | 4.581016  |
| C  | 0.855488  | -2.726161 | 0.958362  | H  | 0.712830  | 3.166556  | 5.647184  |
| H  | 0.202827  | -3.230448 | 1.698795  | C  | 0.228275  | 3.708908  | 3.593466  |
| H  | 0.606466  | -3.126838 | -0.040157 | H  | -0.523634 | 4.460607  | 3.880423  |
| C  | 2.322977  | -2.977611 | 1.357286  | C  | 0.484750  | 3.475046  | 2.231372  |
| H  | 2.564327  | -4.046330 | 1.171340  | H  | -0.079943 | 4.033504  | 1.471310  |
| H  | 2.407535  | -2.825715 | 2.451631  | C  | 1.212377  | 3.635539  | -0.802084 |
| C  | 4.245561  | -1.494537 | 1.748462  | C  | 1.900777  | 4.840590  | -0.521428 |
| H  | 5.164200  | -1.128189 | 1.253183  | H  | 2.722342  | 4.854578  | 0.213104  |
| H  | 4.572277  | -2.294635 | 2.453432  | C  | 1.528514  | 6.031882  | -1.163169 |
| C  | 3.600709  | -0.336532 | 2.497161  | H  | 2.068542  | 6.964846  | -0.937734 |
| H  | 4.320263  | 0.073790  | 3.234378  | C  | 0.465181  | 6.033920  | -2.087496 |
| H  | 3.319107  | 0.485326  | 1.805265  | H  | 0.171812  | 6.969431  | -2.589118 |
| H  | 2.681208  | -0.633129 | 3.037738  | C  | -0.230657 | 4.842607  | -2.354606 |
| C  | 4.225377  | -2.931957 | -0.230828 | H  | -1.086429 | 4.836934  | -3.045943 |
| H  | 3.536590  | -3.498445 | -0.884309 | C  | 0.136588  | 3.645571  | -1.711622 |
| H  | 4.792912  | -3.675221 | 0.377296  | H  | -0.444071 | 2.734413  | -1.910743 |
| C  | 5.229445  | -2.156063 | -1.100859 | C  | 3.428835  | -1.871747 | -1.900388 |
| H  | 5.944725  | -1.586097 | -0.472102 | C  | 2.693644  | -2.080160 | -3.087014 |
| H  | 5.850589  | -2.929118 | -1.601220 | H  | 1.749595  | -1.548274 | -3.266972 |
| C  | 4.691665  | -1.264960 | -2.226879 | C  | 3.161859  | -2.980953 | -4.059705 |
| H  | 5.548853  | -0.941143 | -2.859820 | H  | 2.576253  | -3.138769 | -4.978883 |
| H  | 4.044247  | -1.864852 | -2.898211 | C  | 4.365356  | -3.679377 | -3.857437 |
| C  | 4.705563  | 0.898806  | -0.978165 | H  | 4.727850  | -4.387413 | -4.619285 |
| H  | 4.931913  | 0.413980  | -0.009419 | C  | 5.104006  | -3.473490 | -2.677539 |
| H  | 4.018917  | 1.738023  | -0.742774 | H  | 6.048063  | -4.016203 | -2.512335 |
| C  | 6.003962  | 1.412363  | -1.603536 | C  | 4.638623  | -2.577121 | -1.701072 |
| H  | 6.437731  | 2.191935  | -0.944287 | H  | 5.220441  | -2.427858 | -0.777540 |
| H  | 6.760086  | 0.608249  | -1.711212 | C  | 3.421126  | -1.466337 | 0.940998  |
| H  | 5.838683  | 1.869174  | -2.601172 | C  | 4.398787  | -0.929387 | 1.804093  |
| C  | 3.307586  | 0.628466  | -3.002860 | H  | 4.934870  | -0.004188 | 1.546247  |
| H  | 3.696941  | 0.165864  | -3.933581 | C  | 4.704033  | -1.583684 | 3.012421  |
| H  | 3.656898  | 1.680059  | -3.007221 | H  | 5.467296  | -1.157092 | 3.681952  |
| C  | 1.768455  | 0.630270  | -3.051492 | C  | 4.045460  | -2.776163 | 3.359906  |
| H  | 1.344544  | -0.356987 | -3.313919 | H  | 4.287815  | -3.284538 | 4.306417  |
| H  | 1.430975  | 1.356098  | -3.819145 | C  | 3.079536  | -3.322444 | 2.493191  |
| Cl | -1.007530 | -1.617312 | -2.195786 | H  | 2.562284  | -4.258324 | 2.756719  |
| O  | 1.807942  | -2.204094 | -1.746376 | C  | 2.764282  | -2.669274 | 1.292212  |
| H  | 2.233491  | -2.195223 | -2.627401 | H  | 2.002321  | -3.098924 | 0.621020  |

|    |           |           |           |   |           |           |           |
|----|-----------|-----------|-----------|---|-----------|-----------|-----------|
| C  | -0.967260 | 0.387121  | 2.436723  | H | 3.622397  | 2.672015  | 0.742842  |
| H  | -0.398632 | 0.979921  | 3.177395  | C | 3.824530  | 1.463240  | -1.074977 |
| H  | -1.480949 | 1.074468  | 1.733529  | H | 4.925324  | 1.425080  | -0.941621 |
| C  | -1.901802 | -0.562297 | 3.152247  | H | 3.620436  | 1.581236  | -2.160588 |
| H  | -2.648215 | -0.000513 | 3.757046  | C | 1.050729  | 2.693727  | 1.752191  |
| H  | -1.316323 | -1.189073 | 3.852510  | C | 1.886925  | 2.103232  | 2.728377  |
| C  | -3.039800 | -2.691555 | 3.000496  | H | 2.723079  | 1.452654  | 2.427923  |
| H  | -3.889842 | -3.175533 | 2.486575  | C | 1.639984  | 2.319644  | 4.094100  |
| H  | -3.439291 | -2.343310 | 3.979813  | H | 2.297276  | 1.854071  | 4.845247  |
| C  | -1.902751 | -3.689096 | 3.191881  | C | 0.551892  | 3.116756  | 4.499708  |
| H  | -2.263859 | -4.563079 | 3.770815  | H | 0.356504  | 3.281120  | 5.571086  |
| H  | -1.524742 | -4.048607 | 2.211709  | C | -0.288567 | 3.695696  | 3.531408  |
| H  | -1.046072 | -3.247138 | 3.739200  | H | -1.147501 | 4.312646  | 3.839216  |
| C  | -3.823687 | -0.744397 | 1.676793  | C | -0.043826 | 3.484786  | 2.163030  |
| H  | -3.445772 | 0.203342  | 1.243877  | H | -0.719687 | 3.927315  | 1.417372  |
| H  | -4.479442 | -0.481101 | 2.538336  | C | 0.529448  | 3.709938  | -0.889158 |
| C  | -4.650669 | -1.465261 | 0.614429  | C | 0.997818  | 5.021018  | -0.629151 |
| H  | -5.139797 | -2.375693 | 1.018381  | H | 1.817769  | 5.184609  | 0.088630  |
| H  | -5.476209 | -0.771131 | 0.356800  | C | 0.409684  | 6.124555  | -1.267166 |
| C  | -3.933519 | -1.750842 | -0.700338 | H | 0.780099  | 7.139732  | -1.054488 |
| H  | -4.673950 | -2.066882 | -1.465050 | C | -0.653632 | 5.934200  | -2.172308 |
| H  | -3.479906 | -0.812777 | -1.076948 | H | -1.116757 | 6.800150  | -2.670700 |
| C  | -3.278090 | -4.097963 | -0.099386 | C | -1.132330 | 4.636643  | -2.421706 |
| H  | -3.586479 | -3.960616 | 0.948211  | H | -1.984152 | 4.476469  | -3.099621 |
| H  | -2.371205 | -4.734345 | -0.077876 | C | -0.547091 | 3.529711  | -1.778366 |
| C  | -4.407247 | -4.782948 | -0.871597 | H | -0.950455 | 2.527746  | -1.963502 |
| H  | -4.635405 | -5.748777 | -0.376192 | C | 3.787230  | -1.316131 | -1.908148 |
| H  | -5.337712 | -4.179962 | -0.870493 | C | 3.085955  | -1.638706 | -3.090671 |
| H  | -4.135042 | -5.002845 | -1.923338 | H | 2.078490  | -1.235327 | -3.265068 |
| C  | -2.290138 | -2.976147 | -2.024179 | C | 3.669879  | -2.477961 | -4.056046 |
| H  | -3.130346 | -3.006719 | -2.750611 | H | 3.110628  | -2.724307 | -4.972482 |
| H  | -1.794403 | -3.967598 | -2.040394 | C | 4.957300  | -3.005222 | -3.848852 |
| C  | -1.295092 | -1.901499 | -2.405519 | H | 5.411512  | -3.667128 | -4.603174 |
| H  | -1.737509 | -0.885146 | -2.423157 | C | 5.662499  | -2.686511 | -2.673281 |
| H  | -0.811398 | -2.118073 | -3.379710 | H | 6.672026  | -3.094371 | -2.505757 |
| H  | -0.780555 | 0.627684  | -0.987747 | C | 5.081550  | -1.848017 | -1.706354 |
| H  | -0.508068 | 1.030044  | -0.256408 | H | 5.639868  | -1.607389 | -0.787495 |
| P  | -3.045448 | 2.062952  | -1.010817 | C | 3.795163  | -0.763436 | 0.905641  |
| O  | -2.212869 | 2.386779  | 0.290905  | C | 4.725278  | -0.019620 | 1.662191  |
| O  | -4.500019 | 1.610413  | -0.683996 | H | 5.089922  | 0.955699  | 1.306658  |
| O  | -3.165992 | 3.531762  | -1.824805 | C | 5.199964  | -0.521911 | 2.888917  |
| O  | -2.296392 | 1.109349  | -1.999946 | H | 5.922750  | 0.068248  | 3.474234  |
| H  | -2.886017 | 4.245577  | -1.184075 | C | 4.761142  | -1.771357 | 3.361520  |
| O  | -5.906336 | 0.086440  | -2.338000 | H | 5.135388  | -2.161079 | 4.321356  |
| H  | -6.451926 | -0.403824 | -1.693515 | C | 3.843822  | -2.524213 | 2.603198  |
| H  | -5.343195 | 0.670761  | -1.729657 | H | 3.497545  | -3.505049 | 2.965631  |
| O  | -2.115347 | 5.000155  | 0.303724  | C | 3.358035  | -2.020347 | 1.386726  |
| H  | -1.279047 | 5.201236  | -0.163197 | H | 2.631073  | -2.608504 | 0.801527  |
| H  | -2.066774 | 3.986606  | 0.425702  | C | -0.938500 | 0.214854  | 2.426606  |
| 4b |           |           |           | H | -0.466514 | 0.902776  | 3.153330  |
| Ni | -1.069847 | -2.097526 | 0.597998  | H | -1.546414 | 0.804175  | 1.714053  |
| Fe | 0.812900  | 0.214644  | -0.647254 | C | -1.729016 | -0.840769 | 3.165529  |
| S  | 0.380693  | -0.693030 | 1.514238  | H | -2.545618 | -0.381578 | 3.766575  |
| S  | 0.328998  | -2.011888 | -1.060187 | H | -1.056417 | -1.364500 | 3.872265  |
| P  | 1.320210  | 2.278002  | -0.024727 | C | -2.538959 | -3.117239 | 3.053168  |
| P  | 3.037503  | -0.172305 | -0.662796 | H | -3.316913 | -3.727035 | 2.558760  |
| O  | 0.642982  | 0.925107  | -3.451305 | H | -2.971627 | -2.818727 | 4.035038  |
| N  | -2.324868 | -1.873030 | 2.241922  | C | -1.266852 | -3.936724 | 3.239765  |
| N  | -2.356665 | -3.200549 | -0.580012 | H | -1.488895 | -4.843408 | 3.838362  |
| C  | 0.750872  | 0.649326  | -2.307210 | H | -0.854758 | -4.254036 | 2.258849  |
| C  | 3.173850  | 2.590414  | -0.266637 | H | -0.475283 | -3.365232 | 3.764766  |
| H  | 3.307759  | 3.569896  | -0.766473 | C | -3.622572 | -1.329726 | 1.725028  |

|    |           |           |           |
|----|-----------|-----------|-----------|
| H  | -3.401829 | -0.330763 | 1.299608  |
| H  | -4.303883 | -1.174996 | 2.593365  |
| C  | -4.337079 | -2.169456 | 0.668554  |
| H  | -4.682490 | -3.140725 | 1.079147  |
| H  | -5.258102 | -1.609214 | 0.408601  |
| C  | -3.591354 | -2.357092 | -0.648026 |
| H  | -4.283913 | -2.783740 | -1.403617 |
| H  | -3.284798 | -1.365890 | -1.035184 |
| C  | -2.599226 | -4.575151 | -0.030272 |
| H  | -2.910710 | -4.473049 | 1.020415  |
| H  | -1.610418 | -5.075136 | -0.015482 |
| C  | -3.627621 | -5.423256 | -0.781446 |
| H  | -3.710920 | -6.406144 | -0.274133 |
| H  | -4.634551 | -4.959006 | -0.775279 |
| H  | -3.338396 | -5.614270 | -1.834302 |
| C  | -1.800081 | -3.350664 | -1.975939 |
| H  | -2.633542 | -3.505682 | -2.694490 |
| H  | -1.173232 | -4.264917 | -1.985029 |
| C  | -0.955579 | -2.161418 | -2.376733 |
| H  | -1.534997 | -1.221402 | -2.428048 |
| H  | -0.457128 | -2.328063 | -3.353353 |
| H  | -1.767778 | 0.636787  | -1.335341 |
| H  | -0.656627 | 0.579990  | -0.506992 |
| P  | -3.631949 | 1.668484  | -0.791368 |
| O  | -2.839732 | 2.065968  | 0.478516  |
| O  | -4.937850 | 0.882407  | -0.617600 |
| O  | -3.934945 | 3.031198  | -1.664569 |
| O  | -2.648317 | 0.806801  | -1.809172 |
| H  | -3.622108 | 3.817171  | -1.107662 |
| O  | -5.950352 | -0.990322 | -2.271748 |
| H  | -6.385887 | -1.561012 | -1.609363 |
| H  | -5.536305 | -0.286553 | -1.688811 |
| O  | -2.956622 | 4.713709  | 0.212813  |
| H  | -2.106772 | 4.981105  | -0.193548 |
| H  | -2.783867 | 3.762723  | 0.501850  |
| S  |           |           |           |
| Ni | 1.598365  | -1.260633 | -0.913111 |
| Fe | -0.405536 | -0.164061 | 0.348129  |
| S  | 0.196866  | 0.148448  | -1.979476 |
| S  | -0.336596 | -2.327336 | -0.597157 |
| P  | -0.316589 | 1.882731  | 1.090693  |
| P  | -2.645202 | 0.091468  | 0.221644  |
| O  | -0.460269 | -1.073133 | 3.095046  |
| N  | 3.169891  | -0.107826 | -1.426513 |
| N  | 2.548810  | -2.714637 | 0.110844  |
| C  | -0.461435 | -0.700793 | 1.972014  |
| C  | -1.950389 | 2.201651  | 1.960110  |
| H  | -1.867559 | 1.647606  | 2.919375  |
| H  | -2.067668 | 3.279651  | 2.190770  |
| C  | -3.119683 | 1.679919  | 1.112840  |
| H  | -3.379139 | 2.418118  | 0.328216  |
| H  | -4.032682 | 1.526026  | 1.722391  |
| C  | -0.160044 | 3.264170  | -0.125737 |
| C  | -1.106770 | 3.365697  | -1.174041 |
| H  | -1.929763 | 2.641231  | -1.263067 |
| C  | -0.979339 | 4.364756  | -2.152523 |
| H  | -1.724565 | 4.430770  | -2.960745 |
| C  | 0.106931  | 5.259814  | -2.114911 |
| H  | 0.212860  | 6.034067  | -2.890990 |
| C  | 1.062701  | 5.150923  | -1.089750 |
| H  | 1.923073  | 5.838009  | -1.059577 |
| C  | 0.930247  | 4.161825  | -0.097694 |

|   |           |           |           |
|---|-----------|-----------|-----------|
| H | 1.692316  | 4.084217  | 0.692456  |
| C | 0.946554  | 2.272332  | 2.376986  |
| C | 0.815410  | 3.405236  | 3.213059  |
| H | -0.048230 | 4.079913  | 3.105076  |
| C | 1.797307  | 3.685434  | 4.178839  |
| H | 1.687504  | 4.568516  | 4.828026  |
| C | 2.918611  | 2.844584  | 4.314837  |
| H | 3.686982  | 3.069289  | 5.071476  |
| C | 3.054291  | 1.717609  | 3.484251  |
| H | 3.927671  | 1.053754  | 3.584003  |
| C | 2.070317  | 1.430780  | 2.522500  |
| H | 2.159376  | 0.543462  | 1.874400  |
| C | -3.591236 | 0.134229  | -1.363771 |
| C | -3.139283 | -0.671581 | -2.434333 |
| H | -2.241985 | -1.295749 | -2.308312 |
| C | -3.829396 | -0.682884 | -3.659102 |
| H | -3.466871 | -1.318143 | -4.482773 |
| C | -4.971233 | 0.119454  | -3.833067 |
| H | -5.508013 | 0.117197  | -4.794928 |
| C | -5.427387 | 0.924253  | -2.772373 |
| H | -6.324983 | 1.550098  | -2.899922 |
| C | -4.746525 | 0.930015  | -1.542287 |
| H | -5.131287 | 1.554515  | -0.721411 |
| C | -3.461519 | -1.272664 | 1.159567  |
| C | -3.711967 | -2.509881 | 0.521350  |
| H | -3.553611 | -2.616659 | -0.562946 |
| C | -4.164164 | -3.613090 | 1.265242  |
| H | -4.357990 | -4.570036 | 0.754886  |
| C | -4.371147 | -3.497200 | 2.652840  |
| H | -4.725342 | -4.363078 | 3.234222  |
| C | -4.123259 | -2.269220 | 3.292661  |
| H | -4.282516 | -2.168801 | 4.378170  |
| C | -3.666623 | -1.163033 | 2.553883  |
| H | -3.456028 | -0.217775 | 3.078219  |
| C | 1.456308  | 1.441853  | -2.369342 |
| H | 1.721628  | 1.301876  | -3.436843 |
| H | 1.006699  | 2.446524  | -2.271247 |
| C | 2.648926  | 1.300201  | -1.456469 |
| H | 3.460987  | 2.004602  | -1.744624 |
| H | 2.348558  | 1.544458  | -0.417953 |
| C | 3.586790  | -0.603046 | -2.787958 |
| H | 2.667045  | -0.698355 | -3.396781 |
| H | 3.959971  | -1.634428 | -2.645801 |
| C | 4.628866  | 0.236072  | -3.529717 |
| H | 4.849943  | -0.259214 | -4.497216 |
| H | 4.263145  | 1.258213  | -3.755230 |
| H | 5.584369  | 0.319451  | -2.973738 |
| C | 4.304725  | -0.123584 | -0.456098 |
| H | 3.951800  | 0.418199  | 0.444109  |
| H | 5.144676  | 0.469496  | -0.877922 |
| C | 4.789178  | -1.506183 | -0.039676 |
| H | 5.698676  | -1.359394 | 0.578639  |
| H | 5.113084  | -2.113986 | -0.909419 |
| C | 3.774259  | -2.242686 | 0.822793  |
| H | 4.250541  | -3.110242 | 1.328387  |
| H | 3.421352  | -1.558893 | 1.621861  |
| C | 2.844221  | -3.792323 | -0.898662 |
| H | 3.474838  | -3.331305 | -1.682461 |
| H | 1.885156  | -4.039088 | -1.393244 |
| C | 3.510183  | -5.062356 | -0.367284 |
| H | 3.626429  | -5.772929 | -1.210987 |
| H | 4.520558  | -4.872337 | 0.047393  |

|               |           |           |           |               |           |           |           |
|---------------|-----------|-----------|-----------|---------------|-----------|-----------|-----------|
| H             | 2.899339  | -5.566307 | 0.408943  | H             | 1.088308  | 3.139493  | 4.849066  |
| C             | 1.597501  | -3.171183 | 1.181045  | C             | 1.200193  | 4.636586  | 3.269217  |
| H             | 1.482227  | -2.310813 | 1.865202  | H             | 1.910671  | 5.278424  | 3.813524  |
| H             | 2.051751  | -4.001253 | 1.766302  | C             | 0.743539  | 5.010444  | 1.991600  |
| C             | 0.242280  | -3.572450 | 0.638455  | H             | 1.091784  | 5.948404  | 1.530760  |
| H             | -0.501353 | -3.630893 | 1.458910  | C             | -0.161167 | 4.193000  | 1.294280  |
| H             | 0.262336  | -4.553456 | 0.121782  | H             | -0.505393 | 4.501439  | 0.295198  |
| H             | 1.142969  | -0.301176 | 0.510214  | C             | 1.307563  | -2.071784 | 1.710883  |
| <sup>51</sup> |           |           |           | H             | 0.829477  | -2.492666 | 2.617018  |
| Ni            | 2.350219  | -0.117747 | -0.275920 | H             | 0.934871  | -2.616583 | 0.825805  |
| Fe            | -0.549066 | 0.060428  | -0.396099 | C             | 2.818667  | -2.177669 | 1.848373  |
| S             | 0.826217  | -0.295355 | 1.536698  | H             | 3.114778  | -3.249278 | 1.893954  |
| S             | 1.050883  | 1.661539  | -1.108393 | H             | 3.110386  | -1.730615 | 2.817975  |
| P             | -2.308619 | -1.275457 | 0.387787  | C             | 4.792454  | -0.844587 | 1.439186  |
| P             | -1.658926 | 1.839589  | 0.875728  | H             | 5.579625  | -0.667515 | 0.684375  |
| O             | -1.954816 | 0.451687  | -2.932575 | H             | 5.231583  | -1.573892 | 2.158301  |
| N             | 3.619589  | -1.494332 | 0.766833  | C             | 4.438409  | 0.463324  | 2.140168  |
| N             | 3.689995  | 0.308908  | -1.920156 | H             | 5.346759  | 0.892690  | 2.609454  |
| C             | -1.400911 | 0.278825  | -1.914021 | H             | 4.037871  | 1.212698  | 1.423738  |
| C             | -3.494972 | -0.179100 | 1.316365  | H             | 3.674792  | 0.322552  | 2.930918  |
| H             | -4.175889 | 0.237366  | 0.543846  | C             | 4.070169  | -2.494345 | -0.252660 |
| H             | -4.104147 | -0.798315 | 2.005703  | H             | 3.159868  | -3.020975 | -0.600455 |
| C             | -2.769171 | 0.950804  | 2.062102  | H             | 4.719731  | -3.246139 | 0.253929  |
| H             | -2.108668 | 0.544448  | 2.853847  | C             | 4.836002  | -1.939877 | -1.465105 |
| H             | -3.486467 | 1.638619  | 2.553855  | H             | 5.793005  | -1.475326 | -1.147741 |
| C             | -1.861740 | -2.641420 | 1.532855  | H             | 5.141454  | -2.832128 | -2.052114 |
| C             | -1.879999 | -2.461944 | 2.933991  | C             | 4.104334  | -1.023425 | -2.455230 |
| H             | -2.212420 | -1.513099 | 3.379281  | H             | 4.761212  | -0.876327 | -3.342174 |
| C             | -1.459951 | -3.501799 | 3.781196  | H             | 3.180182  | -1.517013 | -2.814038 |
| H             | -1.479830 | -3.353096 | 4.872198  | C             | 4.834145  | 1.112732  | -1.380788 |
| C             | -1.012465 | -4.721475 | 3.240645  | H             | 5.233373  | 0.594232  | -0.495606 |
| H             | -0.678887 | -5.531784 | 3.907687  | H             | 4.393376  | 2.059047  | -1.007588 |
| C             | -0.993034 | -4.902169 | 1.845582  | C             | 5.979907  | 1.389795  | -2.357614 |
| H             | -0.644679 | -5.854016 | 1.414983  | H             | 6.720712  | 2.052569  | -1.865439 |
| C             | -1.414144 | -3.868617 | 0.993086  | H             | 6.508435  | 0.459807  | -2.650191 |
| H             | -1.384048 | -4.017492 | -0.097403 | H             | 5.637649  | 1.897271  | -3.282614 |
| C             | -3.316384 | -2.135507 | -0.887829 | C             | 3.001603  | 1.124545  | -2.986011 |
| C             | -4.693508 | -2.384116 | -0.690733 | H             | 3.258353  | 0.725793  | -3.991014 |
| H             | -5.202538 | -2.043104 | 0.223836  | H             | 3.404914  | 2.154922  | -2.942653 |
| C             | -5.425872 | -3.080753 | -1.667522 | C             | 1.484584  | 1.193342  | -2.848422 |
| H             | -6.500406 | -3.265929 | -1.511780 | H             | 1.020623  | 0.211281  | -3.053823 |
| C             | -4.790910 | -3.543510 | -2.835163 | H             | 1.071565  | 1.944694  | -3.551015 |
| H             | -5.368835 | -4.090087 | -3.597001 | Cl            | 0.962856  | -1.788925 | -1.480232 |
| C             | -3.417622 | -3.308472 | -3.027283 | <sup>55</sup> |           |           |           |
| H             | -2.914266 | -3.670585 | -3.937446 | Ni            | 1.440145  | -1.592740 | -0.794152 |
| C             | -2.681440 | -2.602985 | -2.060180 | Fe            | -0.193851 | -0.007631 | 0.221851  |
| H             | -1.606134 | -2.416574 | -2.212773 | S             | 0.612098  | 0.178602  | -2.048145 |
| C             | -2.755864 | 2.914392  | -0.140136 | S             | -0.797291 | -2.403872 | -0.897238 |
| C             | -2.264767 | 3.381102  | -1.383181 | P             | -0.133399 | 2.340834  | 0.751524  |
| H             | -1.246242 | 3.108938  | -1.704098 | P             | -2.538476 | 0.275746  | 0.142631  |
| C             | -3.067374 | 4.186187  | -2.208583 | O             | -0.298021 | -0.569586 | 3.090653  |
| H             | -2.669207 | 4.547460  | -3.169832 | N             | 3.361505  | -0.745062 | -0.976370 |
| C             | -4.376461 | 4.517133  | -1.814031 | N             | 1.893697  | -3.294370 | 0.333553  |
| H             | -5.009952 | 5.139663  | -2.465433 | C             | -0.278804 | -0.376415 | 1.928348  |
| C             | -4.875460 | 4.046861  | -0.585430 | C             | -1.824367 | 2.700051  | 1.464313  |
| H             | -5.900392 | 4.300672  | -0.271595 | H             | -1.775813 | 2.288418  | 2.494914  |
| C             | -4.070768 | 3.253953  | 0.251740  | H             | -1.982003 | 3.795042  | 1.541182  |
| H             | -4.479502 | 2.905163  | 1.212128  | C             | -2.946393 | 2.036491  | 0.653685  |
| C             | -0.626842 | 2.986168  | 1.869736  | H             | -3.116908 | 2.578696  | -0.298606 |
| C             | -0.163082 | 2.614830  | 3.155256  | H             | -3.907640 | 2.043305  | 1.207973  |
| H             | -0.496213 | 1.677976  | 3.625257  | C             | 0.128746  | 3.544916  | -0.608999 |
| C             | 0.740808  | 3.439197  | 3.847613  | C             | -0.647762 | 3.390386  | -1.785154 |

|   |           |           |           |                                       |           |           |           |
|---|-----------|-----------|-----------|---------------------------------------|-----------|-----------|-----------|
| H | -1.421116 | 2.610021  | -1.844855 | H                                     | 3.277635  | -4.013806 | 1.791944  |
| C | -0.410664 | 4.206483  | -2.902333 | H                                     | 2.686853  | -2.345757 | 2.017844  |
| H | -1.022379 | 4.075675  | -3.808963 | C                                     | 2.154654  | -4.351404 | -0.695362 |
| C | 0.614715  | 5.171191  | -2.872951 | H                                     | 3.014397  | -4.007126 | -1.303216 |
| H | 0.806292  | 5.801694  | -3.755479 | H                                     | 1.284401  | -4.349507 | -1.383009 |
| C | 1.398804  | 5.319122  | -1.714509 | C                                     | 2.412936  | -5.766065 | -0.172429 |
| H | 2.207350  | 6.066756  | -1.685471 | H                                     | 2.587838  | -6.439294 | -1.036389 |
| C | 1.160816  | 4.511487  | -0.587838 | H                                     | 3.310422  | -5.818342 | 0.476947  |
| H | 1.792100  | 4.630060  | 0.305985  | H                                     | 1.548011  | -6.168049 | 0.393208  |
| C | 1.016993  | 2.831312  | 2.096477  | C                                     | 0.690285  | -3.586211 | 1.168597  |
| C | 0.886544  | 4.060972  | 2.783102  | H                                     | 0.595805  | -2.742458 | 1.876536  |
| H | 0.090064  | 4.769485  | 2.505556  | H                                     | 0.859935  | -4.502224 | 1.780004  |
| C | 1.780356  | 4.386417  | 3.817676  | C                                     | -0.604772 | -3.726827 | 0.375220  |
| H | 1.674485  | 5.345066  | 4.349661  | H                                     | -1.459593 | -3.681263 | 1.082494  |
| C | 2.808882  | 3.492387  | 4.172895  | H                                     | -0.659613 | -4.707561 | -0.142189 |
| H | 3.508211  | 3.752005  | 4.983314  | H                                     | 1.184302  | -0.791392 | 0.606767  |
| C | 2.940147  | 2.266422  | 3.496162  | <sup>55</sup> (Ni-H <sub>2</sub> O-X) |           |           |           |
| H | 3.739324  | 1.560880  | 3.772624  | Ni                                    | 2.373520  | -0.664237 | -0.447511 |
| C | 2.044635  | 1.934551  | 2.464802  | Fe                                    | -0.858463 | -0.014959 | -0.763463 |
| H | 2.132969  | 0.965601  | 1.946824  | S                                     | 0.529216  | -0.926655 | 0.996798  |
| C | -3.519083 | 0.080288  | -1.401468 | S                                     | 1.159386  | 1.071909  | -1.470138 |
| C | -2.870690 | 0.177437  | -2.650508 | P                                     | -2.793145 | -0.644315 | 0.436306  |
| H | -1.777620 | 0.308852  | -2.688927 | P                                     | -0.837604 | 1.935911  | 0.980096  |
| C | -3.616431 | 0.102143  | -3.840180 | O                                     | -2.341525 | 1.338875  | -2.892965 |
| H | -3.101409 | 0.177541  | -4.810949 | N                                     | 3.393178  | -2.058955 | 0.777172  |
| C | -5.011093 | -0.073937 | -3.790051 | N                                     | 3.931934  | -0.095087 | -1.788360 |
| H | -5.593916 | -0.137708 | -4.722588 | C                                     | -1.764247 | 0.794961  | -2.029158 |
| C | -5.661403 | -0.169647 | -2.545076 | C                                     | -3.203580 | 0.664455  | 1.696195  |
| H | -6.753594 | -0.306030 | -2.500726 | H                                     | -3.806567 | 1.415560  | 1.142557  |
| C | -4.921714 | -0.090115 | -1.352595 | H                                     | -3.854164 | 0.226079  | 2.480404  |
| H | -5.438728 | -0.165111 | -0.382880 | C                                     | -1.956637 | 1.309873  | 2.313561  |
| C | -3.378884 | -0.814201 | 1.361148  | H                                     | -1.358439 | 0.559112  | 2.868733  |
| C | -3.743506 | -2.128200 | 0.984772  | H                                     | -2.233731 | 2.110103  | 3.030070  |
| H | -3.604212 | -2.458585 | -0.056327 | C                                     | -2.577915 | -2.224224 | 1.354537  |
| C | -4.271437 | -3.016488 | 1.936168  | C                                     | -2.311368 | -2.262409 | 2.740975  |
| H | -4.552549 | -4.036470 | 1.629759  | H                                     | -2.285777 | -1.340408 | 3.340005  |
| C | -4.440667 | -2.606507 | 3.272361  | C                                     | -2.068859 | -3.493579 | 3.376111  |
| H | -4.853156 | -3.304871 | 4.017539  | H                                     | -1.861553 | -3.513216 | 4.457631  |
| C | -4.083025 | -1.299984 | 3.650407  | C                                     | -2.089315 | -4.690922 | 2.637777  |
| H | -4.214799 | -0.968924 | 4.692667  | H                                     | -1.894760 | -5.652195 | 3.138895  |
| C | -3.552754 | -0.406345 | 2.702657  | C                                     | -2.357056 | -4.654436 | 1.256599  |
| H | -3.266792 | 0.606381  | 3.025072  | H                                     | -2.373735 | -5.587091 | 0.670857  |
| C | 2.165665  | 1.173706  | -2.109326 | C                                     | -2.597545 | -3.428541 | 0.615120  |
| H | 2.576268  | 1.053324  | -3.132835 | H                                     | -2.777711 | -3.402529 | -0.470294 |
| H | 1.934385  | 2.248214  | -1.966705 | C                                     | -4.377022 | -0.895393 | -0.471896 |
| C | 3.150929  | 0.731368  | -1.039237 | C                                     | -5.607828 | -0.840815 | 0.223713  |
| H | 4.122250  | 1.259527  | -1.176062 | H                                     | -5.633835 | -0.647715 | 1.307192  |
| H | 2.751869  | 1.031829  | -0.051064 | C                                     | -6.814964 | -1.041030 | -0.466472 |
| C | 3.892640  | -1.314564 | -2.254608 | H                                     | -7.769138 | -0.992028 | 0.081619  |
| H | 3.099994  | -1.186777 | -3.020485 | C                                     | -6.805852 | -1.305979 | -1.848989 |
| H | 3.986245  | -2.407323 | -2.101666 | H                                     | -7.754393 | -1.462915 | -2.386548 |
| C | 5.217032  | -0.742291 | -2.765032 | C                                     | -5.583395 | -1.374477 | -2.539771 |
| H | 5.502005  | -1.277774 | -3.693794 | H                                     | -5.568303 | -1.588997 | -3.620054 |
| H | 5.142362  | 0.336279  | -3.011605 | C                                     | -4.371512 | -1.169419 | -1.856202 |
| H | 6.042203  | -0.877642 | -2.036400 | H                                     | -3.414703 | -1.244461 | -2.394096 |
| C | 4.224374  | -1.038973 | 0.202067  | C                                     | -1.629084 | 3.465256  | 0.325866  |
| H | 3.797743  | -0.461733 | 1.048567  | C                                     | -1.265025 | 3.893300  | -0.972427 |
| H | 5.246161  | -0.633482 | 0.024057  | H                                     | -0.523523 | 3.315936  | -1.548463 |
| C | 4.313628  | -2.509524 | 0.610668  | C                                     | -1.845110 | 5.046170  | -1.528528 |
| H | 5.112762  | -2.576281 | 1.378210  | H                                     | -1.548800 | 5.372582  | -2.537980 |
| H | 4.662429  | -3.147679 | -0.227541 | C                                     | -2.809137 | 5.770629  | -0.804056 |
| C | 3.043969  | -3.067438 | 1.253715  | H                                     | -3.271444 | 6.668582  | -1.243612 |



C -3.185068 5.341956 0.482591  
 H -3.941403 5.903981 1.053256  
 C -2.596673 4.197936 1.050013  
 H -2.898207 3.884351 2.061268  
 C 0.680529 2.519000 1.843112  
 C 0.957996 2.184880 3.189104  
 H 0.235247 1.614711 3.790413  
 C 2.170461 2.578930 3.782295  
 H 2.370732 2.310080 4.831382  
 C 3.125544 3.297387 3.042676  
 H 4.079194 3.592499 3.507684  
 C 2.856674 3.632606 1.702194  
 H 3.596656 4.196267 1.112223  
 C 1.643776 3.251098 1.106523  
 H 1.450603 3.521061 0.057279  
 C 0.891681 -2.733150 1.037009  
 H 0.236374 -3.222698 1.785875  
 H 0.663074 -3.172984 0.049604  
 C 2.357966 -2.928892 1.463135  
 H 2.634209 -3.995565 1.320784  
 H 2.424987 -2.732048 2.551404  
 C 4.226108 -1.368382 1.816124  
 H 5.143703 -0.999451 1.320658  
 H 4.560460 -2.126920 2.561755  
 C 3.538284 -0.195252 2.501926  
 H 4.231524 0.257012 3.239638  
 H 3.260750 0.595649 1.772715  
 H 2.611885 -0.490148 3.031750  
 C 4.275868 -2.891443 -0.102173  
 H 3.610171 -3.493789 -0.747879  
 H 4.845704 -3.600449 0.543158  
 C 5.280378 -2.126648 -0.979878  
 H 5.969531 -1.516898 -0.359402  
 H 5.928428 -2.903835 -1.437823  
 C 4.746132 -1.292793 -2.150075  
 H 5.607896 -0.977154 -2.780651  
 H 4.121159 -1.931977 -2.806053  
 C 4.692520 0.917421 -0.981966  
 H 4.895197 0.478627 0.013139  
 H 3.988939 1.756569 -0.803092  
 C 6.002682 1.420998 -1.589943  
 H 6.405376 2.234554 -0.952476  
 H 6.771684 0.623425 -1.638421  
 H 5.863448 1.831499 -2.611336  
 C 3.356017 0.549364 -3.028753  
 H 3.759286 0.044487 -3.930846  
 H 3.708403 1.598803 -3.074527  
 C 1.818428 0.551893 -3.111454  
 H 1.398426 -0.441834 -3.355687  
 H 1.494449 1.261972 -3.898736  
 Cl -1.012459 -2.175280 -2.241689  
 O 1.862372 -2.254589 -1.697005  
 H 2.287113 -2.258266 -2.578289  
 H 0.866817 -2.226563 -1.903646  
<sup>55</sup>(Ni-H<sub>2</sub>O-Y)  
 Ni 2.481440 -0.048357 -0.151924  
 Fe -0.716413 -0.036866 -0.572590  
 S 0.692122 -0.514758 1.308988  
 S 0.978980 1.463645 -1.244077  
 P -2.595181 -1.036756 0.443138  
 P -1.365919 1.908107 0.933367  
 O -2.259240 0.715749 -2.936835

N 3.478348 -1.887218 0.630706  
 N 3.684437 0.061966 -1.941820  
 C -1.660872 0.413306 -1.974199  
 C -3.422830 0.185552 1.577136  
 H -4.118731 0.760251 0.929297  
 H -4.036397 -0.355022 2.326307  
 C -2.408787 1.124254 2.247874  
 H -1.709134 0.553960 2.892220  
 H -2.913490 1.877225 2.886919  
 C -2.193397 -2.516293 1.458247  
 C -2.150338 -2.473354 2.869392  
 H -2.414622 -1.558290 3.419407  
 C -1.758752 -3.612994 3.594835  
 H -1.727118 -3.570043 4.694968  
 C -1.409915 -4.798882 2.923186  
 H -1.101685 -5.687815 3.495698  
 C -1.454096 -4.843455 1.517221  
 H -1.177573 -5.766256 0.983257  
 C -1.838155 -3.708323 0.785970  
 H -1.832108 -3.740183 -0.314285  
 C -3.934552 -1.644095 -0.666245  
 C -5.287770 -1.630880 -0.257085  
 H -5.574671 -1.245345 0.733073  
 C -6.286177 -2.119967 -1.117346  
 H -7.338879 -2.101060 -0.793727  
 C -5.944546 -2.634058 -2.381993  
 H -6.730347 -3.016991 -3.052207  
 C -4.597827 -2.658417 -2.786816  
 H -4.323070 -3.061461 -3.774449  
 C -3.594777 -2.162342 -1.936254  
 H -2.538739 -2.181085 -2.252804  
 C -2.432373 3.172025 0.125544  
 C -2.081660 3.600699 -1.177003  
 H -1.180211 3.190938 -1.660941  
 C -2.874421 4.543881 -1.852753  
 H -2.585660 4.874044 -2.863144  
 C -4.036961 5.053129 -1.246036  
 H -4.664160 5.784798 -1.779453  
 C -4.398351 4.621814 0.043802  
 H -5.308321 5.015840 0.523596  
 C -3.600201 3.690355 0.730703  
 H -3.896091 3.372817 1.742237  
 C -0.047587 2.852866 1.794567  
 C 0.491708 2.404260 3.024714  
 H 0.044825 1.551458 3.554993  
 C 1.617617 3.036857 3.581475  
 H 2.022288 2.673660 4.539364  
 C 2.225356 4.121379 2.923051  
 H 3.111472 4.609144 3.358080  
 C 1.690397 4.578839 1.703184  
 H 2.152883 5.430667 1.180238  
 C 0.566741 3.950043 1.140389  
 H 0.169138 4.317665 0.182096  
 C 1.110289 -2.297873 1.453800  
 H 0.548972 -2.735109 2.302733  
 H 0.787222 -2.802240 0.522248  
 C 2.601507 -2.430175 1.716609  
 H 2.855909 -3.504867 1.879692  
 H 2.851125 -1.891532 2.652111  
 C 4.866622 -1.800340 1.189099  
 H 5.579566 -1.767787 0.343977  
 H 5.077736 -2.755819 1.725333

|    |           |           |           |
|----|-----------|-----------|-----------|
| C  | 5.117324  | -0.605570 | 2.100983  |
| H  | 6.100467  | -0.724110 | 2.600150  |
| H  | 5.134736  | 0.337698  | 1.524694  |
| H  | 4.347775  | -0.509224 | 2.893954  |
| C  | 3.451786  | -2.852518 | -0.514023 |
| H  | 2.387085  | -2.996291 | -0.789191 |
| H  | 3.840614  | -3.834068 | -0.151816 |
| C  | 4.219603  | -2.442948 | -1.772759 |
| H  | 5.296304  | -2.273168 | -1.564050 |
| H  | 4.194723  | -3.327785 | -2.443364 |
| C  | 3.625272  | -1.290291 | -2.579010 |
| H  | 4.127745  | -1.243570 | -3.571973 |
| H  | 2.552652  | -1.504668 | -2.764497 |
| C  | 5.063563  | 0.485484  | -1.550021 |
| H  | 5.403350  | -0.181648 | -0.739193 |
| H  | 4.954759  | 1.487737  | -1.091125 |
| C  | 6.107685  | 0.515609  | -2.667822 |
| H  | 7.070573  | 0.872987  | -2.248393 |
| H  | 6.286698  | -0.489693 | -3.100731 |
| H  | 5.826175  | 1.203560  | -3.490827 |
| C  | 3.101741  | 1.060016  | -2.893139 |
| H  | 3.498409  | 0.882859  | -3.918763 |
| H  | 3.445821  | 2.065366  | -2.574927 |
| C  | 1.577920  | 1.042440  | -2.931895 |
| H  | 1.165784  | 0.049926  | -3.203838 |
| H  | 1.207354  | 1.793557  | -3.657962 |
| Cl | 0.045659  | -2.053627 | -1.820912 |
| O  | 3.279477  | 1.593457  | 0.912910  |
| H  | 3.053472  | 1.469184  | 1.862150  |
| H  | 2.698347  | 2.344393  | 0.648365  |
| 6a |           |           |           |
| Ni | -1.228533 | -1.724160 | 0.901441  |
| Fe | 0.524717  | 0.048399  | -0.464132 |
| S  | 0.260779  | -0.359035 | 1.867893  |
| S  | 0.555616  | -2.315010 | -0.257836 |
| P  | 0.736947  | 2.269022  | -0.475110 |
| P  | 2.828751  | 0.038380  | -0.470339 |
| O  | 0.562457  | -0.106572 | -3.369995 |
| N  | -2.639450 | -1.013301 | 2.134800  |
| N  | -2.309966 | -2.956726 | -0.223811 |
| C  | 0.550629  | -0.020371 | -2.204905 |
| C  | 2.272665  | 2.601845  | -1.472318 |
| H  | 2.063559  | 2.291440  | -2.516459 |
| H  | 2.497092  | 3.687516  | -1.461507 |
| C  | 3.410369  | 1.776052  | -0.863276 |
| H  | 3.729871  | 2.227597  | 0.097434  |
| H  | 4.299229  | 1.736675  | -1.522983 |
| C  | 1.082605  | 3.160126  | 1.103681  |
| C  | 1.880741  | 2.539482  | 2.092205  |
| H  | 2.229377  | 1.503861  | 1.965139  |
| C  | 2.216805  | 3.227092  | 3.269268  |
| H  | 2.835761  | 2.726707  | 4.030055  |
| C  | 1.757105  | 4.540242  | 3.474722  |
| H  | 2.012357  | 5.076484  | 4.402220  |
| C  | 0.969325  | 5.166298  | 2.491978  |
| H  | 0.609368  | 6.195984  | 2.643870  |
| C  | 0.635654  | 4.485175  | 1.308442  |
| H  | 0.025385  | 4.992571  | 0.546182  |
| C  | -0.646570 | 3.161784  | -1.271598 |
| C  | -0.590208 | 3.562708  | -2.623952 |
| H  | 0.321652  | 3.411853  | -3.220554 |
| C  | -1.717238 | 4.150627  | -3.224601 |

|   |           |           |           |
|---|-----------|-----------|-----------|
| H | -1.670937 | 4.456223  | -4.281495 |
| C | -2.896895 | 4.342792  | -2.483955 |
| H | -3.780089 | 4.795016  | -2.961183 |
| C | -2.954716 | 3.941055  | -1.137191 |
| H | -3.885251 | 4.046281  | -0.560674 |
| C | -1.839032 | 3.342094  | -0.534286 |
| H | -1.899734 | 2.999867  | 0.510961  |
| C | 3.767532  | -0.475271 | 1.030533  |
| C | 3.330034  | -1.587499 | 1.786308  |
| H | 2.434441  | -2.149705 | 1.484384  |
| C | 4.038913  | -1.994020 | 2.929135  |
| H | 3.684270  | -2.862613 | 3.505653  |
| C | 5.187586  | -1.292718 | 3.334788  |
| H | 5.738780  | -1.606757 | 4.235056  |
| C | 5.632830  | -0.189984 | 2.583643  |
| H | 6.536805  | 0.360074  | 2.888773  |
| C | 4.931968  | 0.217617  | 1.435826  |
| H | 5.310455  | 1.076500  | 0.862486  |
| C | 3.485648  | -1.036781 | -1.813762 |
| C | 3.713203  | -2.411895 | -1.577594 |
| H | 3.608847  | -2.831709 | -0.566292 |
| C | 4.090872  | -3.255660 | -2.636207 |
| H | 4.268335  | -4.324774 | -2.440321 |
| C | 4.247058  | -2.738044 | -3.934686 |
| H | 4.543193  | -3.401316 | -4.762509 |
| C | 4.028626  | -1.368858 | -4.171518 |
| H | 4.152960  | -0.954587 | -5.184340 |
| C | 3.645830  | -0.519631 | -3.119418 |
| H | 3.460483  | 0.544484  | -3.330864 |
| C | -0.949693 | 0.760204  | 2.701802  |
| H | -0.811241 | 0.587428  | 3.788135  |
| H | -0.687747 | 1.814527  | 2.487980  |
| C | -2.356926 | 0.461672  | 2.234821  |
| H | -3.101772 | 0.946792  | 2.903622  |
| H | -2.513334 | 0.868840  | 1.218911  |
| C | -2.393076 | -1.770985 | 3.421211  |
| H | -1.301354 | -1.786396 | 3.602244  |
| H | -2.682881 | -2.819913 | 3.214785  |
| C | -3.110910 | -1.245454 | 4.665217  |
| H | -2.838134 | -1.896582 | 5.520597  |
| H | -2.800629 | -0.212334 | 4.921298  |
| H | -4.214825 | -1.267416 | 4.570978  |
| C | -4.074670 | -1.144238 | 1.721597  |
| H | -4.290882 | -0.310670 | 1.030404  |
| H | -4.707070 | -0.976347 | 2.618077  |
| C | -4.444782 | -2.458033 | 1.050883  |
| H | -5.539343 | -2.431899 | 0.871380  |
| H | -4.267105 | -3.330744 | 1.712686  |
| C | -3.762304 | -2.613391 | -0.300507 |
| H | -4.271010 | -3.386966 | -0.913721 |
| H | -3.827605 | -1.653489 | -0.849769 |
| C | -2.087514 | -4.320715 | 0.386620  |
| H | -2.407007 | -4.246550 | 1.444363  |
| H | -0.995706 | -4.493526 | 0.419722  |
| C | -2.784695 | -5.491126 | -0.305417 |
| H | -2.473872 | -6.427131 | 0.201743  |
| H | -3.889327 | -5.429639 | -0.241971 |
| H | -2.496044 | -5.578875 | -1.372572 |
| C | -1.762718 | -2.829459 | -1.622786 |
| H | -1.944993 | -1.781197 | -1.935493 |
| H | -2.331417 | -3.489987 | -2.313685 |
| C | -0.280905 | -3.132745 | -1.685681 |

|    |           |           |           |               |           |           |           |
|----|-----------|-----------|-----------|---------------|-----------|-----------|-----------|
| H  | 0.163636  | -2.758876 | -2.628347 | C             | -5.134515 | 0.690330  | -0.941006 |
| H  | -0.054389 | -4.214614 | -1.603164 | H             | -5.435121 | 1.326505  | -0.094589 |
| H  | -1.099967 | -0.267829 | -0.339019 | C             | -3.436625 | -1.387295 | 1.667536  |
| C  | -4.657961 | 1.428534  | -2.903443 | C             | -3.768877 | -2.646752 | 1.116226  |
| H  | -5.170713 | 2.083436  | -2.172460 | H             | -3.799076 | -2.786071 | 0.024863  |
| H  | -4.458466 | 1.981379  | -3.841592 | C             | -4.067214 | -3.732091 | 1.958060  |
| H  | -5.344345 | 0.585569  | -3.137468 | H             | -4.325337 | -4.707374 | 1.515655  |
| C  | -3.369757 | 0.844369  | -2.316404 | C             | -4.040736 | -3.574474 | 3.356153  |
| O  | -3.368470 | 0.598140  | -1.054641 | H             | -4.274799 | -4.426416 | 4.013843  |
| O  | -2.402997 | 0.589593  | -3.089075 | C             | -3.717482 | -2.322053 | 3.909417  |
| H  | -0.988976 | 0.564732  | -0.638578 | H             | -3.697588 | -2.188086 | 5.002664  |
| O  | -5.018573 | 1.969396  | 0.500279  | C             | -3.412002 | -1.234158 | 3.072741  |
| H  | -5.881965 | 1.569017  | 0.278763  | H             | -3.139099 | -0.268508 | 3.525803  |
| H  | -4.395235 | 1.461777  | -0.117504 | C             | 0.978749  | 1.149408  | -2.533624 |
| 6b |           |           |           | H             | 0.991683  | 1.125465  | -3.642152 |
| Ni | 1.212835  | -1.567308 | -1.111853 | H             | 0.625227  | 2.152026  | -2.221126 |
| Fe | -0.552665 | -0.197619 | 0.368687  | C             | 2.331695  | 0.855362  | -1.928903 |
| S  | -0.245460 | -0.129254 | -1.998760 | H             | 3.121568  | 1.488613  | -2.385868 |
| S  | -0.674376 | -2.436680 | -0.338915 | H             | 2.314588  | 1.087997  | -0.846796 |
| P  | -0.581485 | 1.965274  | 0.781578  | C             | 2.706992  | -1.111373 | -3.449762 |
| P  | -2.815419 | -0.039411 | 0.573701  | H             | 1.662721  | -1.086574 | -3.815003 |
| O  | -0.253257 | -0.891817 | 3.166520  | H             | 2.980449  | -2.182684 | -3.392893 |
| N  | 2.702261  | -0.598777 | -2.031713 | C             | 3.624465  | -0.377780 | -4.429394 |
| N  | 2.218372  | -3.057040 | -0.234292 | H             | 3.516165  | -0.849061 | -5.427601 |
| C  | -0.390182 | -0.580381 | 2.035961  | H             | 3.353220  | 0.692186  | -4.535495 |
| C  | -1.936996 | 2.178534  | 2.061464  | H             | 4.694229  | -0.442097 | -4.146355 |
| H  | -1.624674 | 1.641866  | 2.980436  | C             | 4.045744  | -0.742474 | -1.394889 |
| H  | -2.066186 | 3.252771  | 2.305013  | H             | 4.011591  | -0.149719 | -0.462786 |
| C  | -3.214610 | 1.571228  | 1.461717  | H             | 4.802163  | -0.257565 | -2.047622 |
| H  | -3.628185 | 2.256659  | 0.694257  | C             | 4.457738  | -2.166589 | -1.050140 |
| H  | -4.003434 | 1.413110  | 2.223620  | H             | 5.513660  | -2.126329 | -0.711527 |
| C  | -1.229055 | 3.157649  | -0.491359 | H             | 4.450767  | -2.836308 | -1.934692 |
| C  | -1.970855 | 2.690962  | -1.597011 | C             | 3.638252  | -2.735531 | 0.100898  |
| H  | -2.054007 | 1.610165  | -1.785707 | H             | 4.121953  | -3.647883 | 0.510563  |
| C  | -2.600248 | 3.594009  | -2.471478 | H             | 3.604145  | -1.993130 | 0.921957  |
| H  | -3.175267 | 3.207451  | -3.327488 | C             | 2.119022  | -4.215625 | -1.196158 |
| C  | -2.494822 | 4.977952  | -2.250394 | H             | 2.586685  | -3.881178 | -2.142183 |
| H  | -2.984407 | 5.687803  | -2.935727 | H             | 1.046484  | -4.355207 | -1.428407 |
| C  | -1.762690 | 5.453463  | -1.145882 | C             | 2.733950  | -5.536934 | -0.734125 |
| H  | -1.679704 | 6.536369  | -0.961860 | H             | 2.548775  | -6.298500 | -1.518944 |
| C  | -1.139020 | 4.551807  | -0.267193 | H             | 3.830707  | -5.471919 | -0.587676 |
| H  | -0.583617 | 4.940718  | 0.600523  | H             | 2.274453  | -5.908481 | 0.204241  |
| C  | 0.901072  | 2.812689  | 1.460229  | C             | 1.516408  | -3.318684 | 1.071738  |
| C  | 1.189622  | 2.760561  | 2.842312  | H             | 1.638992  | -2.399382 | 1.672696  |
| H  | 0.526421  | 2.215647  | 3.531775  | H             | 2.022771  | -4.145388 | 1.617992  |
| C  | 2.335921  | 3.400140  | 3.346664  | C             | 0.041571  | -3.612111 | 0.892188  |
| H  | 2.552868  | 3.354530  | 4.425246  | H             | -0.501621 | -3.497897 | 1.851573  |
| C  | 3.201489  | 4.093480  | 2.480884  | H             | -0.150248 | -4.634022 | 0.507378  |
| H  | 4.096575  | 4.594637  | 2.881418  | H             | 1.020158  | -0.335149 | 0.287780  |
| C  | 2.931446  | 4.126180  | 1.101694  | C             | 4.424007  | 0.676039  | 3.516881  |
| H  | 3.622947  | 4.627359  | 0.408752  | H             | 5.125427  | 1.529106  | 3.505877  |
| C  | 1.794403  | 3.479687  | 0.590637  | H             | 3.742535  | 0.739092  | 4.386352  |
| H  | 1.597832  | 3.504021  | -0.492870 | H             | 5.002604  | -0.268180 | 3.607824  |
| C  | -3.956146 | -0.088130 | -0.876849 | C             | 3.650294  | 0.632243  | 2.228650  |
| C  | -3.613608 | -0.910021 | -1.974961 | O             | 3.988748  | 1.210942  | 1.196835  |
| H  | -2.702010 | -1.524618 | -1.937158 | O             | 2.560878  | -0.146855 | 2.299968  |
| C  | -4.429702 | -0.947190 | -3.118998 | H             | 2.044649  | -0.128555 | 1.432398  |
| H  | -4.149587 | -1.592265 | -3.966725 | O             | 4.832117  | 2.692970  | -1.057256 |
| C  | -5.591445 | -0.157506 | -3.182948 | H             | 5.474271  | 3.307657  | -0.651512 |
| H  | -6.225772 | -0.177959 | -4.083187 | H             | 4.506811  | 2.191762  | -0.273739 |
| C  | -5.942935 | 0.657081  | -2.090282 | <sup>71</sup> |           |           |           |
| H  | -6.856260 | 1.271634  | -2.129853 | Ni            | 2.611405  | 0.048767  | -0.080602 |

|    |           |           |           |    |           |           |           |
|----|-----------|-----------|-----------|----|-----------|-----------|-----------|
| Fe | -0.493550 | -0.041902 | -0.570670 | C  | 2.769518  | -2.352145 | 1.771641  |
| S  | 0.923250  | -0.362249 | 1.500128  | H  | 3.018830  | -3.436054 | 1.850047  |
| S  | 1.271389  | 1.737542  | -1.032947 | H  | 3.047204  | -1.883825 | 2.735747  |
| P  | -2.496962 | -1.196768 | 0.399958  | C  | 4.959879  | -1.461762 | 1.295568  |
| P  | -1.500078 | 1.849261  | 0.950809  | H  | 5.705806  | -1.404570 | 0.481919  |
| O  | -1.769496 | 0.916566  | -3.294225 | H  | 5.262371  | -2.337964 | 1.914679  |
| N  | 3.616370  | -1.737906 | 0.696773  | C  | 4.989607  | -0.176271 | 2.116856  |
| N  | 3.887424  | 0.254290  | -1.824117 | H  | 6.001744  | -0.022310 | 2.542676  |
| C  | -1.451696 | 0.697497  | -2.206732 | H  | 4.749352  | 0.709317  | 1.488604  |
| C  | -3.453186 | -0.055798 | 1.520456  | H  | 4.265444  | -0.198772 | 2.955851  |
| H  | -4.188069 | 0.452561  | 0.861006  | C  | 3.698652  | -2.700803 | -0.444280 |
| H  | -4.030692 | -0.640682 | 2.265602  | H  | 2.653039  | -2.924805 | -0.740844 |
| C  | -2.534830 | 0.964085  | 2.208071  | H  | 4.150014  | -3.650548 | -0.071830 |
| H  | -1.810275 | 0.447408  | 2.870535  | C  | 4.470865  | -2.240012 | -1.682524 |
| H  | -3.107031 | 1.677806  | 2.836025  | H  | 5.538400  | -2.046706 | -1.448314 |
| C  | -2.040626 | -2.660410 | 1.412793  | H  | 4.485117  | -3.114070 | -2.367417 |
| C  | -2.001465 | -2.630944 | 2.824206  | C  | 3.870675  | -1.086133 | -2.485457 |
| H  | -2.326695 | -1.740001 | 3.381910  | H  | 4.399764  | -1.016532 | -3.463052 |
| C  | -1.531838 | -3.748640 | 3.538503  | H  | 2.807658  | -1.312844 | -2.709132 |
| H  | -1.504503 | -3.715890 | 4.639192  | C  | 5.248420  | 0.700069  | -1.391225 |
| C  | -1.096474 | -4.898614 | 2.855506  | H  | 5.603097  | 0.010252  | -0.608779 |
| H  | -0.725417 | -5.769103 | 3.418946  | H  | 5.104162  | 1.680709  | -0.893457 |
| C  | -1.135857 | -4.931162 | 1.448235  | C  | 6.308031  | 0.801110  | -2.491214 |
| H  | -0.795493 | -5.827113 | 0.905386  | H  | 7.257383  | 1.159014  | -2.042647 |
| C  | -1.601912 | -3.819149 | 0.729680  | H  | 6.513994  | -0.182715 | -2.959983 |
| H  | -1.607237 | -3.841673 | -0.371942 | H  | 6.025775  | 1.514736  | -3.291427 |
| C  | -3.772402 | -1.862537 | -0.751154 | C  | 3.326998  | 1.270982  | -2.772755 |
| C  | -5.093830 | -2.112779 | -0.313657 | H  | 3.683478  | 1.057878  | -3.805714 |
| H  | -5.383338 | -1.915535 | 0.730438  | H  | 3.732053  | 2.260631  | -2.481068 |
| C  | -6.046810 | -2.623699 | -1.210654 | C  | 1.809047  | 1.338528  | -2.753742 |
| H  | -7.074929 | -2.813345 | -0.863586 | H  | 1.344498  | 0.379473  | -3.060050 |
| C  | -5.689878 | -2.896117 | -2.545375 | H  | 1.457205  | 2.131333  | -3.443881 |
| H  | -6.439608 | -3.298057 | -3.245168 | Cl | 0.230421  | -1.853060 | -1.860077 |
| C  | -4.375058 | -2.656235 | -2.981950 |    |           |           |           |
| H  | -4.089444 | -2.870236 | -4.024019 | Ni | 1.656748  | -1.305373 | -0.732800 |
| C  | -3.418607 | -2.137430 | -2.090291 | Fe | -0.235001 | -0.229461 | 0.259780  |
| H  | -2.386891 | -1.957495 | -2.430720 | S  | 0.338205  | 0.176471  | -2.126292 |
| C  | -2.620356 | 3.004164  | 0.061167  | S  | -0.348922 | -2.612748 | -0.508188 |
| C  | -2.164688 | 3.545243  | -1.165685 | P  | -0.406953 | 2.182914  | 0.918796  |
| H  | -1.156878 | 3.291253  | -1.534733 | P  | -2.731530 | 0.023549  | 0.130525  |
| C  | -2.984534 | 4.409738  | -1.910332 | O  | -0.069732 | -0.927482 | 3.279143  |
| H  | -2.615218 | 4.827825  | -2.859919 | N  | 3.323856  | -0.152454 | -1.292745 |
| C  | -4.274129 | 4.729833  | -1.448262 | N  | 2.641901  | -2.871031 | 0.285943  |
| H  | -4.921759 | 5.399260  | -2.036072 | C  | -0.392336 | -0.574229 | 2.217885  |
| C  | -4.735711 | 4.189640  | -0.233693 | C  | -2.112350 | 2.361159  | 1.662778  |
| H  | -5.744359 | 4.437120  | 0.133319  | H  | -2.020838 | 1.867531  | 2.654159  |
| C  | -3.914709 | 3.334695  | 0.522738  | H  | -2.343896 | 3.431246  | 1.839608  |
| H  | -4.293810 | 2.931731  | 1.474050  | C  | -3.215142 | 1.702774  | 0.814408  |
| C  | -0.354854 | 2.918955  | 1.911098  | H  | -3.448034 | 2.329684  | -0.070005 |
| C  | 0.118175  | 2.517114  | 3.183466  | H  | -4.153020 | 1.610971  | 1.399629  |
| H  | -0.257176 | 1.600427  | 3.660232  | C  | -0.266810 | 3.457945  | -0.392919 |
| C  | 1.085036  | 3.284675  | 3.856149  | C  | -1.103578 | 3.357313  | -1.533022 |
| H  | 1.439149  | 2.960401  | 4.847558  | H  | -1.860120 | 2.562001  | -1.607291 |
| C  | 1.596278  | 4.457414  | 3.271432  | C  | -0.941092 | 4.242228  | -2.610524 |
| H  | 2.355479  | 5.055434  | 3.799702  | H  | -1.598512 | 4.152001  | -3.489527 |
| C  | 1.126979  | 4.864635  | 2.008924  | C  | 0.069871  | 5.222227  | -2.580075 |
| H  | 1.513882  | 5.784985  | 1.543562  | H  | 0.203242  | 5.905658  | -3.433257 |
| C  | 0.161748  | 4.102184  | 1.330958  | C  | 0.913391  | 5.317030  | -1.458863 |
| H  | -0.188858 | 4.438482  | 0.344102  | H  | 1.711266  | 6.075857  | -1.429475 |
| C  | 1.279097  | -2.169886 | 1.558566  | C  | 0.748089  | 4.442468  | -0.369573 |
| H  | 0.720383  | -2.628507 | 2.397751  | H  | 1.422129  | 4.521973  | 0.497075  |
| H  | 0.925668  | -2.632153 | 0.617115  | C  | 0.737637  | 2.708891  | 2.252293  |

|   |           |           |           |                          |           |           |           |
|---|-----------|-----------|-----------|--------------------------|-----------|-----------|-----------|
| C | 0.498598  | 3.848405  | 3.054795  | H                        | 1.519445  | -2.471899 | 1.997833  |
| H | -0.398945 | 4.465474  | 2.890935  | H                        | 2.108509  | -4.154846 | 1.924550  |
| C | 1.415263  | 4.201572  | 4.060014  | C                        | 0.319269  | -3.779505 | 0.762252  |
| H | 1.225518  | 5.088199  | 4.685350  | H                        | -0.402665 | -3.860537 | 1.600614  |
| C | 2.574068  | 3.427941  | 4.266353  | H                        | 0.386952  | -4.778942 | 0.285516  |
| H | 3.290474  | 3.710635  | 5.053769  | H                        | 1.496909  | -0.487132 | 0.691977  |
| C | 2.815056  | 2.294060  | 3.469485  | <sup>75</sup> (Ni-H2O-X) |           |           |           |
| H | 3.717782  | 1.683654  | 3.629446  | Ni                       | 2.323768  | -0.656712 | -0.481260 |
| C | 1.898324  | 1.931825  | 2.467532  | Fe                       | -0.782731 | 0.007688  | -0.916017 |
| H | 2.065765  | 1.030901  | 1.850591  | S                        | 0.493295  | -1.001794 | 0.956797  |
| C | -3.680131 | -0.140324 | -1.434985 | S                        | 1.249643  | 1.101227  | -1.735186 |
| C | -3.102509 | -0.872991 | -2.495363 | P                        | -2.911789 | -0.644933 | 0.444283  |
| H | -2.102111 | -1.315489 | -2.371357 | P                        | -0.751487 | 1.860610  | 0.919955  |
| C | -3.801122 | -1.037783 | -3.704729 | O                        | -3.040296 | 1.482716  | -2.512291 |
| H | -3.343159 | -1.611503 | -4.525773 | N                        | 3.375750  | -2.054719 | 0.862662  |
| C | -5.075595 | -0.465766 | -3.865559 | N                        | 4.029259  | -0.144236 | -1.733058 |
| H | -5.620056 | -0.589158 | -4.815034 | C                        | -2.158925 | 0.995484  | -1.942081 |
| C | -5.656198 | 0.264793  | -2.810958 | C                        | -3.184261 | 0.679207  | 1.715641  |
| H | -6.656693 | 0.709347  | -2.932205 | H                        | -3.753647 | 1.469391  | 1.179871  |
| C | -4.966563 | 0.424137  | -1.597045 | H                        | -3.830095 | 0.309327  | 2.538952  |
| H | -5.438771 | 0.984876  | -0.775312 | C                        | -1.866910 | 1.241628  | 2.270944  |
| C | -3.496189 | -1.214018 | 1.251871  | H                        | -1.285332 | 0.447850  | 2.783051  |
| C | -3.871519 | -2.479770 | 0.744518  | H                        | -2.064973 | 2.040434  | 3.015101  |
| H | -3.813255 | -2.680754 | -0.336674 | C                        | -2.646926 | -2.233454 | 1.330826  |
| C | -4.316883 | -3.487800 | 1.615766  | C                        | -2.495619 | -2.316233 | 2.731968  |
| H | -4.611774 | -4.467556 | 1.207601  | H                        | -2.589966 | -1.421767 | 3.365796  |
| C | -4.385860 | -3.249853 | 3.001896  | C                        | -2.217630 | -3.556048 | 3.336723  |
| H | -4.732990 | -4.042732 | 3.682928  | H                        | -2.099412 | -3.610496 | 4.430592  |
| C | -4.009743 | -1.994269 | 3.512121  | C                        | -2.094748 | -4.718499 | 2.554287  |
| H | -4.061338 | -1.798435 | 4.594908  | H                        | -1.877078 | -5.686280 | 3.032860  |
| C | -3.563622 | -0.980208 | 2.645563  | C                        | -2.240258 | -4.636555 | 1.156346  |
| H | -3.264058 | -0.008704 | 3.068050  | H                        | -2.133114 | -5.539642 | 0.534833  |
| C | 1.680781  | 1.420916  | -2.377939 | C                        | -2.505197 | -3.400920 | 0.544722  |
| H | 2.031748  | 1.319327  | -3.425304 | H                        | -2.574622 | -3.334804 | -0.552307 |
| H | 1.260944  | 2.440424  | -2.275161 | C                        | -4.543774 | -0.864688 | -0.376727 |
| C | 2.817178  | 1.249736  | -1.383098 | C                        | -5.763560 | -0.545494 | 0.262631  |
| H | 3.649606  | 1.944672  | -1.640201 | H                        | -5.773943 | -0.146837 | 1.288726  |
| H | 2.461096  | 1.523837  | -0.369472 | C                        | -6.981905 | -0.745770 | -0.409583 |
| C | 3.763175  | -0.698652 | -2.615019 | H                        | -7.928711 | -0.495132 | 0.094773  |
| H | 2.859626  | -0.764112 | -3.254589 | C                        | -6.994717 | -1.268861 | -1.716280 |
| H | 4.078993  | -1.745045 | -2.442222 | H                        | -7.952247 | -1.426036 | -2.237637 |
| C | 4.871607  | 0.069802  | -3.336760 | C                        | -5.782713 | -1.586965 | -2.355548 |
| H | 5.101477  | -0.446897 | -4.291020 | H                        | -5.786163 | -1.991086 | -3.380264 |
| H | 4.572601  | 1.108599  | -3.583883 | C                        | -4.560148 | -1.380359 | -1.693267 |
| H | 5.809121  | 0.108214  | -2.745523 | H                        | -3.608238 | -1.614135 | -2.198181 |
| C | 4.392042  | -0.195253 | -0.256201 | C                        | -1.525112 | 3.428779  | 0.326562  |
| H | 3.981641  | 0.325998  | 0.633476  | C                        | -1.171405 | 3.887404  | -0.963955 |
| H | 5.264295  | 0.404213  | -0.602079 | H                        | -0.459457 | 3.305503  | -1.572890 |
| C | 4.858028  | -1.590732 | 0.159509  | C                        | -1.728387 | 5.072098  | -1.475066 |
| H | 5.755771  | -1.446839 | 0.796282  | H                        | -1.441418 | 5.420354  | -2.479926 |
| H | 5.211372  | -2.180231 | -0.711934 | C                        | -2.658509 | 5.800604  | -0.711369 |
| C | 3.852763  | -2.376436 | 1.000383  | H                        | -3.103895 | 6.723445  | -1.115441 |
| H | 4.363961  | -3.232819 | 1.495299  | C                        | -3.022217 | 5.344075  | 0.569114  |
| H | 3.479658  | -1.716778 | 1.811120  | H                        | -3.751673 | 5.909365  | 1.170740  |
| C | 2.939567  | -3.915831 | -0.742078 | C                        | -2.456064 | 4.167308  | 1.090842  |
| H | 3.659815  | -3.471095 | -1.455658 | H                        | -2.747118 | 3.833216  | 2.098518  |
| H | 2.004774  | -4.073420 | -1.318262 | C                        | 0.765928  | 2.439168  | 1.795420  |
| C | 3.474977  | -5.252704 | -0.224780 | C                        | 0.985532  | 2.219749  | 3.174399  |
| H | 3.676426  | -5.914701 | -1.091655 | H                        | 0.235155  | 1.706405  | 3.792899  |
| H | 4.426049  | -5.137274 | 0.333982  | C                        | 2.177640  | 2.656460  | 3.779541  |
| H | 2.746586  | -5.773426 | 0.429256  | H                        | 2.334383  | 2.477865  | 4.855049  |
| C | 1.666557  | -3.330893 | 1.318296  | C                        | 3.167428  | 3.304683  | 3.020586  |

|                                       |           |           |           |
|---------------------------------------|-----------|-----------|-----------|
| H                                     | 4.103220  | 3.635529  | 3.497731  |
| C                                     | 2.958102  | 3.519787  | 1.645668  |
| H                                     | 3.727953  | 4.021854  | 1.038503  |
| C                                     | 1.766375  | 3.093921  | 1.037026  |
| H                                     | 1.617634  | 3.266775  | -0.039640 |
| C                                     | 0.909002  | -2.792804 | 1.069849  |
| H                                     | 0.228705  | -3.274813 | 1.800823  |
| H                                     | 0.750084  | -3.272613 | 0.086974  |
| C                                     | 2.351090  | -2.917722 | 1.569206  |
| H                                     | 2.674736  | -3.980120 | 1.512485  |
| H                                     | 2.363994  | -2.644342 | 2.642550  |
| C                                     | 4.193110  | -1.338142 | 1.893168  |
| H                                     | 5.114994  | -0.973421 | 1.403119  |
| H                                     | 4.525232  | -2.078102 | 2.658844  |
| C                                     | 3.484654  | -0.158250 | 2.543038  |
| H                                     | 4.163318  | 0.324682  | 3.274401  |
| H                                     | 3.202355  | 0.605495  | 1.787530  |
| H                                     | 2.556649  | -0.452541 | 3.070103  |
| C                                     | 4.261109  | -2.915444 | 0.018785  |
| H                                     | 3.598645  | -3.508264 | -0.640231 |
| H                                     | 4.792764  | -3.632621 | 0.688081  |
| C                                     | 5.310345  | -2.189923 | -0.833945 |
| H                                     | 5.993618  | -1.584820 | -0.202802 |
| H                                     | 5.954582  | -2.988351 | -1.259620 |
| C                                     | 4.828451  | -1.369969 | -2.032075 |
| H                                     | 5.715363  | -1.086402 | -2.642873 |
| H                                     | 4.206714  | -2.011690 | -2.689213 |
| C                                     | 4.761257  | 0.860262  | -0.891652 |
| H                                     | 4.877432  | 0.437462  | 0.122904  |
| H                                     | 4.070291  | 1.720935  | -0.780940 |
| C                                     | 6.125414  | 1.313904  | -1.413633 |
| H                                     | 6.508914  | 2.124419  | -0.760553 |
| H                                     | 6.870241  | 0.492413  | -1.398776 |
| H                                     | 6.069614  | 1.712968  | -2.447450 |
| C                                     | 3.581590  | 0.490568  | -3.030218 |
| H                                     | 4.089266  | -0.007168 | -3.882973 |
| H                                     | 3.916852  | 1.546604  | -3.038232 |
| C                                     | 2.068098  | 0.466373  | -3.259915 |
| H                                     | 1.682375  | -0.546360 | -3.485180 |
| H                                     | 1.816747  | 1.120610  | -4.119378 |
| Cl                                    | -0.987606 | -1.929076 | -2.414910 |
| O                                     | 1.857622  | -2.302745 | -1.719496 |
| H                                     | 2.309946  | -2.284145 | -2.588036 |
| H                                     | 0.875784  | -2.223920 | -1.962221 |
| <sup>75</sup> (Ni-H <sub>2</sub> O-Y) |           |           |           |
| Ni                                    | 2.540067  | -0.025551 | -0.131074 |
| Fe                                    | -0.681648 | -0.059482 | -0.685595 |
| S                                     | 0.768120  | -0.525870 | 1.340512  |
| S                                     | 1.119589  | 1.587875  | -1.205382 |
| P                                     | -2.669828 | -1.087871 | 0.441555  |
| P                                     | -1.396415 | 1.869915  | 0.977174  |
| O                                     | -2.195232 | 0.920648  | -3.232871 |
| N                                     | 3.477046  | -1.954953 | 0.585150  |
| N                                     | 3.795615  | 0.118699  | -1.879055 |
| C                                     | -1.804424 | 0.701591  | -2.165285 |
| C                                     | -3.453387 | 0.110919  | 1.634624  |
| H                                     | -4.172134 | 0.701166  | 1.027178  |
| H                                     | -4.041521 | -0.431180 | 2.403436  |
| C                                     | -2.408481 | 1.031256  | 2.285489  |
| H                                     | -1.685720 | 0.437740  | 2.882215  |
| H                                     | -2.880019 | 1.768292  | 2.967981  |
| C                                     | -2.260170 | -2.596184 | 1.407851  |

|   |           |           |           |
|---|-----------|-----------|-----------|
| C | -2.175808 | -2.602554 | 2.817509  |
| H | -2.437888 | -1.709238 | 3.404180  |
| C | -1.743892 | -3.759475 | 3.492187  |
| H | -1.679964 | -3.753495 | 4.591877  |
| C | -1.394810 | -4.915550 | 2.770901  |
| H | -1.055085 | -5.817937 | 3.303129  |
| C | -1.477809 | -4.911999 | 1.365202  |
| H | -1.201361 | -5.811268 | 0.792239  |
| C | -1.901090 | -3.758937 | 0.685971  |
| H | -1.932697 | -3.753860 | -0.415412 |
| C | -4.055114 | -1.637566 | -0.641282 |
| C | -5.392560 | -1.692644 | -0.186311 |
| H | -5.645123 | -1.410011 | 0.847616  |
| C | -6.413346 | -2.116763 | -1.054547 |
| H | -7.454000 | -2.153674 | -0.695057 |
| C | -6.109108 | -2.497607 | -2.375519 |
| H | -6.912550 | -2.830146 | -3.051751 |
| C | -4.778627 | -2.452749 | -2.829257 |
| H | -4.534465 | -2.750521 | -3.861312 |
| C | -3.754491 | -2.019325 | -1.968469 |
| H | -2.710992 | -1.981061 | -2.321699 |
| C | -2.475427 | 3.150174  | 0.218105  |
| C | -2.098751 | 3.652303  | -1.051227 |
| H | -1.170397 | 3.292367  | -1.525922 |
| C | -2.897178 | 4.607659  | -1.702680 |
| H | -2.589434 | 4.995546  | -2.686537 |
| C | -4.089219 | 5.055757  | -1.104870 |
| H | -4.720726 | 5.797271  | -1.619207 |
| C | -4.475107 | 4.551349  | 0.151006  |
| H | -5.408440 | 4.897941  | 0.622404  |
| C | -3.672842 | 3.606260  | 0.814567  |
| H | -3.988787 | 3.229460  | 1.799385  |
| C | -0.069488 | 2.788847  | 1.859533  |
| C | 0.451884  | 2.316973  | 3.087883  |
| H | -0.004264 | 1.456686  | 3.597308  |
| C | 1.573053  | 2.934488  | 3.670457  |
| H | 1.964250  | 2.552180  | 4.626442  |
| C | 2.192372  | 4.028209  | 3.039008  |
| H | 3.075340  | 4.504229  | 3.493157  |
| C | 1.672637  | 4.511163  | 1.823207  |
| H | 2.143690  | 5.371181  | 1.321845  |
| C | 0.554489  | 3.896102  | 1.234554  |
| H | 0.170884  | 4.285477  | 0.279939  |
| C | 1.105683  | -2.330328 | 1.405463  |
| H | 0.533033  | -2.783425 | 2.238629  |
| H | 0.756226  | -2.791400 | 0.461309  |
| C | 2.591423  | -2.533214 | 1.645702  |
| H | 2.813041  | -3.623586 | 1.742150  |
| H | 2.862622  | -2.057627 | 2.608633  |
| C | 4.866532  | -1.934436 | 1.142531  |
| H | 5.580226  | -1.878085 | 0.299283  |
| H | 5.057319  | -2.919062 | 1.632247  |
| C | 5.141499  | -0.789349 | 2.109850  |
| H | 6.137344  | -0.931050 | 2.576849  |
| H | 5.140717  | 0.182803  | 1.583209  |
| H | 4.391964  | -0.735824 | 2.925563  |
| C | 3.413642  | -2.855385 | -0.606738 |
| H | 2.344533  | -2.939200 | -0.890910 |
| H | 3.755478  | -3.872667 | -0.298435 |
| C | 4.204903  | -2.417487 | -1.839861 |
| H | 5.287672  | -2.314746 | -1.619384 |
| H | 4.138869  | -3.262118 | -2.557817 |

|    |           |           |           |
|----|-----------|-----------|-----------|
| C  | 3.674657  | -1.194257 | -2.584442 |
| H  | 4.185974  | -1.122542 | -3.571675 |
| H  | 2.594355  | -1.343802 | -2.788863 |
| C  | 5.186534  | 0.444961  | -1.440848 |
| H  | 5.470880  | -0.275733 | -0.655747 |
| H  | 5.122209  | 1.429923  | -0.937887 |
| C  | 6.258206  | 0.468205  | -2.532969 |
| H  | 7.230175  | 0.742382  | -2.073640 |
| H  | 6.386638  | -0.522741 | -3.014334 |
| H  | 6.041188  | 1.213546  | -3.324777 |
| C  | 3.299123  | 1.193638  | -2.795025 |
| H  | 3.731163  | 1.050311  | -3.811942 |
| H  | 3.676993  | 2.160746  | -2.405262 |
| C  | 1.780335  | 1.256665  | -2.888107 |
| H  | 1.336770  | 0.312481  | -3.264829 |
| H  | 1.484233  | 2.075911  | -3.574121 |
| Cl | -0.010032 | -1.856857 | -2.013718 |
| O  | 3.349011  | 1.555397  | 1.014894  |
| H  | 3.049276  | 1.412014  | 1.941156  |
| H  | 2.790410  | 2.313288  | 0.719068  |
| 7a |           |           |           |
| Ni | -1.164637 | 2.174756  | -0.162682 |
| Fe | -0.323558 | -1.008803 | -0.514412 |
| S  | -0.389314 | 0.627812  | 1.218493  |
| S  | -1.957689 | 0.479339  | -1.245962 |
| P  | 1.055616  | -2.443498 | 0.567610  |
| P  | -2.029606 | -2.186068 | 0.399738  |
| O  | -0.244837 | -2.688810 | -2.891474 |
| N  | -0.157383 | 3.605785  | 0.941059  |
| N  | -1.898221 | 3.389852  | -1.675365 |
| C  | -0.310216 | -2.027867 | -1.928156 |
| C  | 0.035433  | -3.700840 | 1.496042  |
| H  | 0.580742  | -4.663741 | 1.544992  |
| H  | -0.026495 | -3.327247 | 2.535129  |
| C  | -1.354632 | -3.848896 | 0.879972  |
| H  | -2.065231 | -4.366410 | 1.556268  |
| H  | -1.315175 | -4.410415 | -0.077760 |
| C  | 2.151800  | -1.732258 | 1.863542  |
| C  | 1.566641  | -1.323566 | 3.087624  |
| H  | 0.493520  | -1.477078 | 3.280519  |
| C  | 2.343913  | -0.675473 | 4.061191  |
| H  | 1.874397  | -0.356387 | 5.004539  |
| C  | 3.707586  | -0.420157 | 3.824101  |
| H  | 4.313757  | 0.099281  | 4.582500  |
| C  | 4.290901  | -0.825113 | 2.609997  |
| H  | 5.351961  | -0.620805 | 2.398576  |
| C  | 3.519298  | -1.480093 | 1.632685  |
| H  | 4.000496  | -1.761246 | 0.686488  |
| C  | 2.110930  | -3.378379 | -0.617297 |
| C  | 1.984469  | -4.776198 | -0.773990 |
| H  | 1.297864  | -5.359696 | -0.143203 |
| C  | 2.735148  | -5.447054 | -1.756309 |
| H  | 2.624376  | -6.536811 | -1.871255 |
| C  | 3.618355  | -4.733497 | -2.584914 |
| H  | 4.206788  | -5.262702 | -3.351031 |
| C  | 3.740123  | -3.339676 | -2.435525 |
| H  | 4.427321  | -2.770261 | -3.081334 |
| C  | 2.982116  | -2.657315 | -1.469947 |
| H  | 3.079445  | -1.559303 | -1.382009 |
| C  | -3.519789 | -2.591678 | -0.600924 |
| C  | -3.582427 | -2.378859 | -1.993709 |
| H  | -2.744294 | -1.913760 | -2.530594 |

|   |           |           |           |
|---|-----------|-----------|-----------|
| C | -4.732302 | -2.750818 | -2.712271 |
| H | -4.773293 | -2.575069 | -3.798545 |
| C | -5.823913 | -3.336394 | -2.047154 |
| H | -6.724656 | -3.623529 | -2.612244 |
| C | -5.766024 | -3.550296 | -0.657246 |
| H | -6.618515 | -4.007066 | -0.130508 |
| C | -4.621314 | -3.177314 | 0.065894  |
| H | -4.586478 | -3.338552 | 1.155383  |
| C | -2.733029 | -1.379046 | 1.893889  |
| C | -2.342391 | -1.735181 | 3.202220  |
| H | -1.701521 | -2.609820 | 3.384033  |
| C | -2.773238 | -0.967159 | 4.298893  |
| H | -2.461103 | -1.253012 | 5.315560  |
| C | -3.593891 | 0.157477  | 4.100691  |
| H | -3.919127 | 0.762515  | 4.961432  |
| C | -4.005449 | 0.501732  | 2.799999  |
| H | -4.656516 | 1.374264  | 2.636129  |
| C | -3.580008 | -0.260971 | 1.701442  |
| H | -3.900933 | 0.023239  | 0.687228  |
| C | 1.210838  | 1.535720  | 1.340359  |
| H | 1.869242  | 1.018351  | 2.062762  |
| H | 1.720415  | 1.549224  | 0.361235  |
| C | 0.840159  | 2.912885  | 1.846420  |
| H | 1.747853  | 3.545999  | 1.943274  |
| H | 0.393602  | 2.825445  | 2.855659  |
| C | -1.093207 | 4.410321  | 1.797562  |
| H | -1.567668 | 5.177499  | 1.159123  |
| H | -0.484983 | 4.964992  | 2.547183  |
| C | -2.171419 | 3.565257  | 2.468833  |
| H | -2.813061 | 4.213382  | 3.099514  |
| H | -2.813898 | 3.069316  | 1.711028  |
| H | -1.748368 | 2.768554  | 3.112787  |
| C | 0.617985  | 4.481674  | 0.002925  |
| H | 1.385148  | 3.834082  | -0.470016 |
| H | 1.157021  | 5.241610  | 0.613176  |
| C | -0.183912 | 5.193629  | -1.084760 |
| H | -0.938021 | 5.882203  | -0.650169 |
| H | 0.536817  | 5.851082  | -1.614523 |
| C | -0.808626 | 4.300004  | -2.150249 |
| H | -1.209405 | 4.934972  | -2.970078 |
| H | -0.029013 | 3.655108  | -2.600342 |
| C | -3.081549 | 4.122590  | -1.104033 |
| H | -2.755725 | 4.628459  | -0.179519 |
| H | -3.798722 | 3.336781  | -0.793360 |
| C | -3.750415 | 5.137975  | -2.031407 |
| H | -4.646390 | 5.544078  | -1.519072 |
| H | -3.084593 | 5.993316  | -2.263902 |
| H | -4.086393 | 4.685104  | -2.986090 |
| C | -2.359746 | 2.549071  | -2.850786 |
| H | -2.215246 | 3.113384  | -3.795732 |
| H | -3.447551 | 2.374168  | -2.734230 |
| C | -1.644212 | 1.210762  | -2.908485 |
| H | -0.553397 | 1.308563  | -3.067833 |
| H | -2.075657 | 0.548617  | -3.686597 |
| H | 1.151946  | -0.387642 | -0.770603 |
| H | 0.625713  | 0.000937  | -1.343509 |
| O | 1.578292  | 1.866450  | -2.400977 |
| H | 0.935651  | 2.117703  | -1.706118 |
| H | 2.283085  | 1.343450  | -1.853798 |
| P | 4.572176  | 1.152820  | -0.582977 |
| O | 3.207443  | 0.474480  | -1.001375 |
| O | 4.965043  | 2.330035  | -1.515469 |

|    |           |           |           |    |           |           |           |
|----|-----------|-----------|-----------|----|-----------|-----------|-----------|
| O  | 4.282001  | 1.935574  | 0.894287  | H  | -3.645377 | 0.459921  | 5.462662  |
| O  | 5.677828  | 0.082802  | -0.326261 | C  | -3.560998 | 0.901829  | 3.329128  |
| H  | 4.072868  | 1.257723  | 1.573023  | H  | -3.716453 | 1.984524  | 3.460161  |
| O  | 7.643944  | 1.883145  | -1.076282 | C  | -3.384177 | 0.376224  | 2.040497  |
| H  | 6.791494  | 2.296348  | -1.389204 | H  | -3.394825 | 1.053792  | 1.169973  |
| H  | 7.209103  | 1.064462  | -0.712769 | C  | 1.476706  | 0.745031  | 1.426836  |
| 7b |           |           |           | H  | 1.848365  | -0.042288 | 2.106454  |
| Ni | -0.396121 | 2.378390  | -0.035785 | H  | 2.010089  | 0.656935  | 0.467678  |
| Fe | -0.853411 | -0.819732 | -0.712785 | C  | 1.625286  | 2.104332  | 2.074999  |
| S  | -0.327109 | 0.525783  | 1.159217  | H  | 2.694045  | 2.331401  | 2.272836  |
| S  | -1.774986 | 1.235909  | -1.259616 | H  | 1.106415  | 2.094049  | 3.052884  |
| P  | 0.052685  | -2.690974 | 0.029839  | C  | 0.417193  | 4.223185  | 2.155701  |
| P  | -2.799049 | -1.561568 | 0.136245  | H  | 0.302978  | 5.171331  | 1.598513  |
| O  | -1.196984 | -1.874719 | -3.389655 | H  | 1.147750  | 4.431356  | 2.970307  |
| N  | 1.026480  | 3.207846  | 1.231659  | C  | -0.933270 | 3.792627  | 2.721748  |
| N  | -0.537260 | 3.923527  | -1.401374 | H  | -1.315354 | 4.576711  | 3.406742  |
| C  | -1.092713 | -1.471781 | -2.283866 | H  | -1.674370 | 3.642176  | 1.908316  |
| C  | -1.292219 | -3.887777 | 0.601335  | H  | -0.869064 | 2.841315  | 3.286822  |
| H  | -1.068148 | -4.904722 | 0.223409  | C  | 2.134076  | 3.812219  | 0.424255  |
| H  | -1.229378 | -3.928812 | 1.706622  | H  | 2.681804  | 2.973138  | -0.056362 |
| C  | -2.679062 | -3.421829 | 0.141724  | H  | 2.854885  | 4.286621  | 1.129308  |
| H  | -3.496354 | -3.872768 | 0.741676  | C  | 1.725033  | 4.841129  | -0.629047 |
| H  | -2.854068 | -3.689204 | -0.922197 | H  | 1.272158  | 5.736487  | -0.154860 |
| C  | 1.171542  | -2.560174 | 1.495809  | H  | 2.668347  | 5.202803  | -1.089029 |
| C  | 0.623816  | -2.248949 | 2.763070  | C  | 0.850425  | 4.341864  | -1.775131 |
| H  | -0.466333 | -2.156523 | 2.892135  | H  | 0.788209  | 5.134632  | -2.552732 |
| C  | 1.469757  | -2.014669 | 3.860537  | H  | 1.320738  | 3.463888  | -2.262193 |
| H  | 1.031910  | -1.765715 | 4.839842  | C  | -1.343005 | 5.024459  | -0.770394 |
| C  | 2.868433  | -2.080870 | 3.706627  | H  | -0.890899 | 5.264142  | 0.206624  |
| H  | 3.529432  | -1.884802 | 4.565205  | H  | -2.334679 | 4.580805  | -0.550864 |
| C  | 3.417738  | -2.393835 | 2.448688  | C  | -1.487127 | 6.304691  | -1.594841 |
| H  | 4.510096  | -2.448653 | 2.308924  | H  | -2.156591 | 7.001691  | -1.050494 |
| C  | 2.573529  | -2.633057 | 1.348305  | H  | -0.516206 | 6.820605  | -1.737941 |
| H  | 3.020894  | -2.850913 | 0.368178  | H  | -1.935066 | 6.119734  | -2.592220 |
| C  | 1.114135  | -3.628198 | -1.159486 | C  | -1.248390 | 3.453620  | -2.655598 |
| C  | 1.390143  | -5.000093 | -0.956923 | H  | -0.847733 | 3.994601  | -3.538769 |
| H  | 0.937315  | -5.543291 | -0.112441 | H  | -2.317409 | 3.727536  | -2.559209 |
| C  | 2.266122  | -5.681388 | -1.818600 | C  | -1.137741 | 1.951318  | -2.839009 |
| H  | 2.471505  | -6.750782 | -1.652636 | H  | -0.095638 | 1.618025  | -2.999285 |
| C  | 2.885962  | -4.998871 | -2.882379 | H  | -1.765003 | 1.597343  | -3.682685 |
| H  | 3.575509  | -5.534133 | -3.554235 | H  | 0.557606  | -0.494233 | -1.147409 |
| C  | 2.627791  | -3.631132 | -3.079349 | H  | 1.285607  | 0.438725  | -1.830590 |
| H  | 3.117721  | -3.086489 | -3.901703 | O  | 2.060277  | 1.019101  | -2.120643 |
| C  | 1.745686  | -2.948564 | -2.223599 | H  | 1.954546  | 1.771351  | -1.498136 |
| H  | 1.558407  | -1.874957 | -2.368798 | H  | 3.153809  | 0.064056  | -1.373458 |
| C  | -4.400850 | -1.254029 | -0.731780 | P  | 5.007048  | 0.088622  | -0.142061 |
| C  | -4.411199 | -0.884664 | -2.094245 | O  | 3.738230  | -0.624346 | -0.905918 |
| H  | -3.464357 | -0.748566 | -2.636179 | O  | 5.342114  | 1.430283  | -0.813909 |
| C  | -5.630639 | -0.685012 | -2.765621 | O  | 4.435340  | 0.516148  | 1.364983  |
| H  | -5.626208 | -0.393568 | -3.827836 | O  | 6.076875  | -1.000785 | 0.027724  |
| C  | -6.848762 | -0.849440 | -2.081835 | H  | 4.120461  | -0.280501 | 1.849527  |
| H  | -7.803327 | -0.687388 | -2.607213 | O  | 8.095103  | 0.877973  | -0.578618 |
| C  | -6.845134 | -1.218218 | -0.723297 | H  | 7.257994  | 1.363843  | -0.791047 |
| H  | -7.796241 | -1.349688 | -0.183252 | H  | 7.665172  | 0.027355  | -0.307609 |
| C  | -5.628102 | -1.418475 | -0.049572 | 8a |           |           |           |
| H  | -5.633018 | -1.702146 | 1.015188  | Ni | 2.315705  | -0.548064 | 0.157084  |
| C  | -3.172906 | -1.011361 | 1.852520  | Fe | -0.789428 | 0.236889  | -0.691851 |
| C  | -3.141249 | -1.862902 | 2.976082  | S  | 0.400446  | -0.449216 | 1.251601  |
| H  | -2.985672 | -2.945848 | 2.857714  | S  | 1.388229  | 0.919268  | -1.128014 |
| C  | -3.310382 | -1.330740 | 4.269313  | P  | -2.847504 | -0.254690 | 0.120329  |
| H  | -3.281795 | -2.003467 | 5.141092  | P  | -1.139508 | 2.323641  | 0.124343  |
| C  | -3.517622 | 0.048428  | 4.448947  | O  | -1.865568 | 1.057862  | -3.272318 |



|   |           |           |           |    |           |           |           |
|---|-----------|-----------|-----------|----|-----------|-----------|-----------|
| N | 2.922729  | -2.051302 | 1.459641  | C  | 3.651314  | -0.158293 | 2.966371  |
| N | 3.898412  | -0.608171 | -1.169262 | H  | 4.428900  | 0.135863  | 3.700102  |
| C | -1.439012 | 0.742457  | -2.229365 | H  | 3.645787  | 0.588284  | 2.144154  |
| C | -3.700656 | 1.327891  | 0.675212  | H  | 2.665654  | -0.104817 | 3.470224  |
| H | -4.747557 | 1.299299  | 0.315223  | C  | 3.436415  | -3.220018 | 0.676104  |
| H | -3.731122 | 1.301485  | 1.781544  | H  | 2.565145  | -3.638896 | 0.135344  |
| C | -2.976441 | 2.571374  | 0.158680  | H  | 3.781271  | -3.992628 | 1.400052  |
| H | -3.224879 | 3.482144  | 0.741014  | C  | 4.550904  | -2.931506 | -0.325006 |
| H | -3.229239 | 2.770086  | -0.904399 | H  | 5.464420  | -2.552107 | 0.177772  |
| C | -2.859325 | -1.316294 | 1.621901  | H  | 4.840666  | -3.913442 | -0.753841 |
| C | -2.351447 | -0.784251 | 2.830994  | C  | 4.160401  | -2.044743 | -1.501354 |
| H | -2.029348 | 0.266746  | 2.889934  | H  | 4.955389  | -2.090723 | -2.276984 |
| C | -2.230993 | -1.604612 | 3.964555  | H  | 3.228353  | -2.429242 | -1.958514 |
| H | -1.828863 | -1.182122 | 4.898417  | C  | 5.062274  | 0.089041  | -0.520310 |
| C | -2.610545 | -2.958712 | 3.902387  | H  | 5.210120  | -0.349069 | 0.481956  |
| H | -2.507760 | -3.601947 | 4.790222  | H  | 4.729605  | 1.133032  | -0.353128 |
| C | -3.124807 | -3.487568 | 2.704509  | C  | 6.376266  | 0.049998  | -1.300691 |
| H | -3.430466 | -4.544064 | 2.650956  | H  | 7.128034  | 0.658889  | -0.758282 |
| C | -3.250950 | -2.671824 | 1.565793  | H  | 6.779601  | -0.979187 | -1.385894 |
| H | -3.654270 | -3.096326 | 0.634119  | H  | 6.275081  | 0.472075  | -2.321124 |
| C | -4.047461 | -1.061782 | -1.020647 | C  | 3.541378  | 0.110223  | -2.456410 |
| C | -5.390836 | -1.204294 | -0.597416 | H  | 4.042214  | -0.384465 | -3.314986 |
| H | -5.701410 | -0.849357 | 0.398374  | H  | 3.936820  | 1.143128  | -2.393266 |
| C | -6.334806 | -1.815309 | -1.437568 | C  | 2.040594  | 0.160369  | -2.672073 |
| H | -7.377101 | -1.922588 | -1.098651 | H  | 1.594794  | -0.842663 | -2.789874 |
| C | -5.949051 | -2.290086 | -2.705593 | H  | 1.766557  | 0.788940  | -3.543496 |
| H | -6.691427 | -2.766660 | -3.365013 | H  | -0.943492 | -1.347187 | -1.012672 |
| C | -4.614453 | -2.159722 | -3.125761 | H  | -0.178548 | -1.117336 | -1.344247 |
| H | -4.304217 | -2.535722 | -4.113181 | O  | 0.905492  | -3.208682 | -1.909165 |
| C | -3.663882 | -1.552337 | -2.285894 | H  | 1.464017  | -3.962437 | -1.632347 |
| H | -2.620615 | -1.475991 | -2.621813 | H  | 1.197390  | -3.037399 | -2.859480 |
| C | -0.530133 | 3.800361  | -0.797102 | O  | -1.597229 | -3.755474 | -1.030325 |
| C | -0.095300 | 3.740726  | -2.137914 | H  | -0.686322 | -3.559352 | -1.393371 |
| H | -0.056150 | 2.785289  | -2.677701 | H  | -1.521218 | -3.499346 | -0.090513 |
| C | 0.305979  | 4.912880  | -2.802276 | O  | 1.819097  | -2.720012 | -4.388034 |
| H | 0.649298  | 4.852853  | -3.846815 | H  | 1.330391  | -1.952610 | -4.752355 |
| C | 0.275409  | 6.150748  | -2.136167 | H  | 2.706435  | -2.343938 | -4.206447 |
| H | 0.594057  | 7.066580  | -2.658440 | 8b |           |           |           |
| C | -0.159841 | 6.215992  | -0.799776 | Ni | 2.361048  | -0.313907 | 0.171661  |
| H | -0.186726 | 7.181754  | -0.271211 | Fe | -0.805162 | 0.186094  | -0.731106 |
| C | -0.557981 | 5.047446  | -0.129773 | S  | 0.438771  | -0.240293 | 1.240737  |
| H | -0.890211 | 5.107865  | 0.918838  | S  | 1.315859  | 0.901841  | -1.292540 |
| C | -0.470616 | 2.600700  | 1.812588  | P  | -2.774390 | -0.447236 | 0.091872  |
| C | -1.295109 | 2.724722  | 2.950143  | P  | -1.371604 | 2.277695  | -0.085929 |
| H | -2.390807 | 2.732919  | 2.858867  | O  | -1.798675 | 0.475535  | -3.438194 |
| C | -0.715904 | 2.846658  | 4.226916  | N  | 3.104222  | -1.540507 | 1.677377  |
| H | -1.367382 | 2.939849  | 5.109783  | N  | 3.931934  | -0.469285 | -1.166273 |
| C | 0.682017  | 2.853723  | 4.375125  | C  | -1.420265 | 0.383276  | -2.323121 |
| H | 1.129965  | 2.945176  | 5.377026  | C  | -3.832811 | 1.069953  | 0.495955  |
| C | 1.507734  | 2.752683  | 3.239705  | H  | -4.860381 | 0.895104  | 0.120841  |
| H | 2.603398  | 2.763956  | 3.346118  | H  | -3.891875 | 1.136317  | 1.600024  |
| C | 0.936823  | 2.625479  | 1.964679  | C  | -3.231969 | 2.342436  | -0.107298 |
| H | 1.593657  | 2.540049  | 1.084135  | H  | -3.602896 | 3.264048  | 0.387012  |
| C | 0.431416  | -2.281818 | 1.467065  | H  | -3.469996 | 2.420298  | -1.189591 |
| H | -0.454805 | -2.611633 | 2.043098  | C  | -2.711098 | -1.357474 | 1.697931  |
| H | 0.435912  | -2.775796 | 0.478113  | C  | -2.320686 | -0.658276 | 2.864659  |
| C | 1.715846  | -2.527607 | 2.235968  | H  | -2.135768 | 0.426528  | 2.830465  |
| H | 1.839035  | -3.604358 | 2.481228  | C  | -2.139760 | -1.347422 | 4.075591  |
| H | 1.675055  | -1.978341 | 3.196598  | H  | -1.832952 | -0.791094 | 4.975155  |
| C | 3.954128  | -1.553788 | 2.430940  | C  | -2.337515 | -2.739955 | 4.135876  |
| H | 4.932548  | -1.553380 | 1.915453  | H  | -2.188221 | -3.278977 | 5.084521  |
| H | 4.037718  | -2.296231 | 3.256521  | C  | -2.726259 | -3.440034 | 2.979014  |

|   |           |           |           |    |           |           |           |
|---|-----------|-----------|-----------|----|-----------|-----------|-----------|
| H | -2.887361 | -4.528852 | 3.018022  | H  | 7.061459  | 1.081703  | -1.078171 |
| C | -2.913250 | -2.753907 | 1.765250  | H  | 6.829104  | -0.657872 | -1.421509 |
| H | -3.225623 | -3.311898 | 0.868518  | H  | 6.192100  | 0.579664  | -2.560387 |
| C | -3.896699 | -1.504514 | -0.929249 | C  | 3.490079  | -0.012260 | -2.541421 |
| C | -5.212799 | -1.757579 | -0.472785 | H  | 4.005778  | -0.610990 | -3.321807 |
| H | -5.559581 | -1.332626 | 0.483065  | H  | 3.809168  | 1.040578  | -2.672261 |
| C | -6.081152 | -2.566011 | -1.223395 | C  | 1.983149  | -0.099445 | -2.688666 |
| H | -7.102389 | -2.756735 | -0.857457 | H  | 1.602216  | -1.132855 | -2.581314 |
| C | -5.646445 | -3.132834 | -2.437063 | H  | 1.633746  | 0.318570  | -3.654887 |
| H | -6.328807 | -3.765895 | -3.026091 | H  | -0.858884 | -2.541531 | -0.908459 |
| C | -4.338685 | -2.892064 | -2.891502 | H  | -0.407183 | -1.229004 | -1.158540 |
| H | -3.989536 | -3.336548 | -3.836848 | O  | 1.447660  | -4.089849 | -1.290037 |
| C | -3.465787 | -2.084252 | -2.139616 | H  | 1.592263  | -5.056931 | -1.207449 |
| H | -2.440958 | -1.914083 | -2.496283 | H  | 1.634625  | -3.833893 | -2.308316 |
| C | -0.910820 | 3.746684  | -1.109610 | O  | -0.920009 | -3.553046 | -0.853200 |
| C | -0.497607 | 3.597361  | -2.450764 | H  | 0.380115  | -3.897836 | -1.083063 |
| H | -0.404627 | 2.596101  | -2.893719 | H  | -1.123207 | -3.714488 | 0.094352  |
| C | -0.197758 | 4.728912  | -3.230441 | O  | 1.896092  | -3.463250 | -3.682630 |
| H | 0.128136  | 4.599271  | -4.274579 | H  | 1.158275  | -2.891008 | -3.984418 |
| C | -0.307665 | 6.017642  | -2.678267 | H  | 2.673002  | -2.863381 | -3.690548 |
| H | -0.068200 | 6.902712  | -3.288755 | 9a |           |           |           |
| C | -0.721840 | 6.173454  | -1.342042 | Ni | 2.317490  | -0.784949 | -0.145165 |
| H | -0.811790 | 7.180221  | -0.904138 | Fe | -0.755235 | 0.363153  | -0.741957 |
| C | -1.020262 | 5.045026  | -0.559777 | S  | 0.449878  | -0.703061 | 1.016134  |
| H | -1.339104 | 5.176007  | 0.486812  | S  | 1.464656  | 0.899597  | -1.197492 |
| C | -0.808388 | 2.795864  | 1.588888  | P  | -2.794013 | -0.057020 | 0.162803  |
| C | -1.678795 | 2.987193  | 2.682017  | P  | -0.846105 | 2.341683  | 0.377084  |
| H | -2.768523 | 2.904417  | 2.555022  | O  | -1.892772 | 1.638678  | -3.099749 |
| C | -1.157466 | 3.290452  | 3.954556  | N  | 2.842462  | -2.485509 | 0.907539  |
| H | -1.845576 | 3.434292  | 4.802518  | N  | 3.905859  | -0.718970 | -1.477230 |
| C | 0.230392  | 3.415804  | 4.141695  | C  | -1.439720 | 1.138532  | -2.142100 |
| H | 0.633841  | 3.653439  | 5.138673  | C  | -3.444444 | 1.513414  | 0.978596  |
| C | 1.102980  | 3.239063  | 3.050467  | H  | -4.514108 | 1.620767  | 0.712386  |
| H | 2.191341  | 3.334978  | 3.188223  | H  | -3.393159 | 1.350704  | 2.072258  |
| C | 0.588045  | 2.923368  | 1.783993  | C  | -2.645876 | 2.745891  | 0.554538  |
| H | 1.280437  | 2.765486  | 0.939972  | H  | -2.780000 | 3.601123  | 1.248162  |
| C | 0.651260  | -1.998855 | 1.752680  | H  | -2.937659 | 3.084974  | -0.462059 |
| H | -0.200112 | -2.315674 | 2.385246  | C  | -2.818746 | -1.291735 | 1.527291  |
| H | 0.704955  | -2.656312 | 0.866692  | C  | -2.228258 | -0.952244 | 2.767844  |
| C | 1.947815  | -1.989288 | 2.539454  | H  | -1.816507 | 0.054115  | 2.937671  |
| H | 2.175769  | -2.990927 | 2.964292  | C  | -2.139654 | -1.909515 | 3.792028  |
| H | 1.849194  | -1.289426 | 3.391807  | H  | -1.672454 | -1.636118 | 4.750974  |
| C | 4.091862  | -0.804628 | 2.535757  | C  | -2.638200 | -3.209793 | 3.587978  |
| H | 5.065385  | -0.801431 | 2.010492  | H  | -2.566033 | -3.960739 | 4.390504  |
| H | 4.244579  | -1.392364 | 3.469527  | C  | -3.225526 | -3.548976 | 2.355140  |
| C | 3.672198  | 0.628775  | 2.846525  | H  | -3.612182 | -4.566808 | 2.188752  |
| H | 4.418930  | 1.097648  | 3.519259  | C  | -3.310960 | -2.598665 | 1.322458  |
| H | 3.608806  | 1.233436  | 1.916919  | H  | -3.730123 | -2.882919 | 0.346918  |
| H | 2.682286  | 0.679815  | 3.341695  | C  | -4.164813 | -0.569703 | -0.954100 |
| C | 3.713242  | -2.775313 | 1.088726  | C  | -5.471507 | -0.668850 | -0.419807 |
| H | 2.880322  | -3.352928 | 0.640343  | H  | -5.652264 | -0.468269 | 0.648768  |
| H | 4.133206  | -3.383222 | 1.922416  | C  | -6.546179 | -1.037453 | -1.244976 |
| C | 4.785887  | -2.562954 | 0.025787  | H  | -7.559268 | -1.114369 | -0.819880 |
| H | 5.670376  | -2.029672 | 0.431774  | C  | -6.326579 | -1.307422 | -2.609280 |
| H | 5.155345  | -3.573643 | -0.246905 | H  | -7.170657 | -1.591660 | -3.257490 |
| C | 4.299322  | -1.915885 | -1.264969 | C  | -5.028041 | -1.221137 | -3.140286 |
| H | 5.075709  | -2.035082 | -2.052107 | H  | -4.848293 | -1.444408 | -4.203698 |
| H | 3.390797  | -2.440461 | -1.620290 | C  | -3.947001 | -0.863585 | -2.314809 |
| C | 5.050792  | 0.406604  | -0.681858 | H  | -2.931144 | -0.843802 | -2.729186 |
| H | 5.253264  | 0.147283  | 0.371854  | C  | -0.141396 | 3.871825  | -0.375511 |
| H | 4.642027  | 1.436780  | -0.674131 | C  | 0.211991  | 3.954998  | -1.739054 |
| C | 6.347768  | 0.338694  | -1.489103 | H  | 0.123370  | 3.081971  | -2.399677 |

C 0.693790 5.163806 -2.271173  
 H 0.971549 5.214783 -3.335560  
 C 0.825999 6.297049 -1.449307  
 H 1.207789 7.241391 -1.868250  
 C 0.472831 6.220351 -0.089463  
 H 0.573049 7.103673 0.560624  
 C -0.005789 5.013940 0.448015  
 H -0.272200 4.961882 1.515720  
 C -0.092044 2.335657 2.053122  
 C -0.860182 2.412260 3.233866  
 H -1.951002 2.545534 3.191602  
 C -0.230288 2.324765 4.489283  
 H -0.838533 2.382072 5.405466  
 C 1.164441 2.170370 4.574268  
 H 1.652770 2.099332 5.558832  
 C 1.936236 2.113684 3.398435  
 H 3.029485 1.998299 3.456501  
 C 1.313292 2.192108 2.143841  
 H 1.926925 2.136429 1.230159  
 C 0.321991 -2.543353 1.016362  
 H -0.540259 -2.847039 1.641659  
 H 0.147263 -2.924829 -0.007917  
 C 1.623972 -3.002841 1.644273  
 H 1.673141 -4.111897 1.691455  
 H 1.668823 -2.632843 2.686812  
 C 3.917720 -2.204666 1.919165  
 H 4.888450 -2.179823 1.391235  
 H 3.967746 -3.070226 2.617777  
 C 3.708873 -0.893542 2.669795  
 H 4.514955 -0.761399 3.419590  
 H 3.735410 -0.030112 1.972357  
 H 2.736170 -0.859249 3.199569  
 C 3.269225 -3.541350 -0.067239  
 H 2.374392 -3.787653 -0.674623  
 H 3.541272 -4.452316 0.512843  
 C 4.426225 -3.179602 -0.997240  
 H 5.351918 -2.957878 -0.426724  
 H 4.655595 -4.100266 -1.573565  
 C 4.144645 -2.091011 -2.026716  
 H 4.991397 -2.041107 -2.745495  
 H 3.244683 -2.358552 -2.612918  
 C 5.078636 -0.165506 -0.715282  
 H 5.207205 -0.769825 0.199142  
 H 4.767081 0.843281 -0.377777  
 C 6.401231 -0.102526 -1.480045  
 H 7.155592 0.397990 -0.839316  
 H 6.789759 -1.111485 -1.725303  
 H 6.319532 0.479670 -2.420321  
 C 3.581588 0.204585 -2.636446  
 H 4.072863 -0.165400 -3.560489  
 H 4.013619 1.199375 -2.410204  
 C 2.083157 0.348372 -2.845563  
 H 1.593837 -0.604543 -3.124527  
 H 1.847126 1.122586 -3.603635  
 H -1.095433 -1.195679 -1.249217  
 H -0.387551 -0.877710 -1.666268  
 O 0.920863 -2.811738 -2.711989  
 H -0.011674 -3.033923 -2.387918  
 H 1.294694 -2.338635 -1.938420  
 Cl -1.842834 -3.327608 -1.660827  
 9b  
 Ni 2.276226 -0.832372 -0.015579

Fe -0.688854 0.456171 -0.735850  
 S 0.437882 -0.455515 1.131312  
 S 1.546289 0.788529 -1.255404  
 P -2.734496 0.156729 0.041303  
 P -0.824632 2.546088 0.093495  
 O -1.638638 1.059382 -3.406159  
 N 2.684292 -2.425697 1.247868  
 N 3.855082 -1.053713 -1.334592  
 C -1.261652 0.860458 -2.304574  
 C -3.495368 1.814044 0.537876  
 H -4.523145 1.880847 0.130098  
 H -3.579769 1.809433 1.642402  
 C -2.633840 2.985425 0.051404  
 H -2.833695 3.920742 0.613793  
 H -2.817642 3.193337 -1.024325  
 C -2.878011 -0.870403 1.568172  
 C -2.381844 -0.357307 2.790045  
 H -1.988130 0.669336 2.844939  
 C -2.362848 -1.164289 3.939451  
 H -1.970449 -0.754916 4.883619  
 C -2.832364 -2.490746 3.881341  
 H -2.812231 -3.123846 4.782375  
 C -3.320714 -3.006137 2.666889  
 H -3.679078 -4.046083 2.610690  
 C -3.340171 -2.203378 1.512141  
 H -3.693657 -2.628921 0.561290  
 C -3.957521 -0.650713 -1.083328  
 C -5.345215 -0.547500 -0.828400  
 H -5.714992 0.046453 0.022540  
 C -6.266799 -1.222673 -1.645556  
 H -7.345271 -1.133780 -1.439769  
 C -5.813881 -2.016833 -2.716656  
 H -6.538582 -2.547610 -3.354284  
 C -4.435521 -2.136932 -2.963470  
 H -4.071772 -2.769604 -3.788289  
 C -3.510673 -1.457334 -2.151187  
 H -2.432388 -1.571343 -2.331368  
 C -0.030411 3.966160 -0.782652  
 C 0.273131 3.867025 -2.158173  
 H 0.065260 2.935371 -2.704063  
 C 0.844191 4.956664 -2.838742  
 H 1.079087 4.866343 -3.911104  
 C 1.121843 6.152355 -2.151400  
 H 1.575393 7.003276 -2.683947  
 C 0.821665 6.257322 -0.780481  
 H 1.035688 7.191362 -0.237045  
 C 0.249414 5.170160 -0.097343  
 H 0.021047 5.259658 0.976786  
 C -0.229575 2.766039 1.821482  
 C -1.073203 3.081896 2.906923  
 H -2.140658 3.295976 2.746145  
 C -0.554198 3.123103 4.215476  
 H -1.221806 3.366716 5.057013  
 C 0.807107 2.858429 4.448288  
 H 1.207633 2.888711 5.473902  
 C 1.656717 2.555516 3.366673  
 H 2.723718 2.343119 3.539465  
 C 1.140935 2.504099 2.062849  
 H 1.809765 2.248025 1.223835  
 C 0.174588 -2.261967 1.380213  
 H -0.695864 -2.422268 2.044910  
 H -0.030882 -2.757927 0.415911

C 1.442933 -2.747106 2.052726  
 H 1.406485 -3.841375 2.243587  
 H 1.532379 -2.250787 3.038093  
 C 3.793538 -2.110614 2.210698  
 H 4.754965 -2.229969 1.678258  
 H 3.787633 -2.885662 3.010627  
 C 3.700650 -0.706129 2.800563  
 H 4.535293 -0.547607 3.513385  
 H 3.766800 0.063558 2.002838  
 H 2.748166 -0.537801 3.341651  
 C 3.013809 -3.628521 0.418657  
 H 2.085033 -3.904635 -0.124602  
 H 3.243313 -4.472575 1.108813  
 C 4.163399 -3.476533 -0.576047  
 H 5.119998 -3.265229 -0.054754  
 H 4.302731 -4.475113 -1.040483  
 C 3.948051 -2.494842 -1.722877  
 H 4.771645 -2.614822 -2.460640  
 H 3.010896 -2.737335 -2.263537  
 C 5.091157 -0.540770 -0.650027  
 H 5.178779 -1.050080 0.324392  
 H 4.887193 0.524940 -0.424376  
 C 6.400034 -0.694729 -1.426347  
 H 7.213638 -0.215200 -0.844690  
 H 6.677178 -1.758529 -1.570772  
 H 6.364484 -0.204315 -2.420259  
 C 3.613315 -0.238392 -2.589569  
 H 4.076998 -0.746414 -3.461282  
 H 4.127462 0.734848 -2.463863  
 C 2.134296 0.010337 -2.823272  
 H 1.569444 -0.920714 -3.015719  
 H 1.968738 0.713321 -3.665249  
 H -0.805407 -0.990785 -1.164234  
 H -0.077432 -1.869760 -1.858475  
 O 0.300660 -2.760159 -2.183808  
 H -0.701118 -3.621356 -1.618552  
 H 1.084198 -2.850384 -1.594577  
 Cl -1.724387 -4.417774 -1.029592  
 Cl  
 Cl 0.000000 0.000000 0.000000  
 H2  
 H 0.000000 0.000000 0.383859  
 H 0.000000 0.000000 -0.383859  
 H2O  
 O 0.000000 -0.000000 0.123841  
 H 0.000000 0.756806 -0.495363  
 H -0.000000 -0.756806 -0.495363  
 H2PO4  
 H 0.144165 -0.829955 1.795455  
 P 0.005376 0.404346 -0.019712  
 O 1.246450 1.231052 0.376428  
 O -1.207216 1.095467 -0.645556  
 O 0.487678 -0.831255 -0.994446  
 O -0.589331 -0.370355 1.333562  
 H 1.475851 -0.971056 -0.810232  
 O -3.192117 -0.713553 -0.131084  
 H -2.713381 -1.043748 0.655983  
 H -2.566829 0.017850 -0.401287  
 O 3.017296 -0.684350 -0.154136  
 H 2.941003 -1.219909 0.662471  
 H 2.536479 0.165571 0.115138  
 HPO4

P -0.067667 -0.181484 -0.097426  
 O 1.028064 -0.515022 -1.180732  
 O -1.146159 -1.296431 0.061007  
 O 0.773172 -0.194123 1.374109  
 O -0.655989 1.257668 -0.265127  
 H 1.714605 0.048457 1.136059  
 O -3.223144 0.461753 0.063357  
 H -2.409060 1.028192 -0.082221  
 H -2.692885 -0.386254 0.104551  
 O 3.111103 0.374697 0.057921  
 H 2.941399 1.334638 -0.029764  
 H 2.364561 -0.011093 -0.551521  
 NiFeSH  
 Ni 2.556608 -0.034579 -0.893193  
 Fe -0.584366 0.091936 0.110007  
 S 0.990776 1.472909 -0.868277  
 S 0.805826 -1.408360 -1.053299  
 P -1.985221 1.613954 0.949614  
 P -2.104654 -1.377423 0.829256  
 O 0.919307 -0.096343 2.553047  
 N 3.934378 1.512085 -0.528017  
 N 3.730434 -1.611768 -0.467406  
 C 0.298331 -0.014092 1.565207  
 C -2.795340 0.868456 2.433302  
 H -2.049950 1.002459 3.243306  
 H -3.696697 1.454283 2.704260  
 C -3.099751 -0.628097 2.228361  
 H -4.165888 -0.795092 1.979130  
 H -2.875189 -1.206315 3.145151  
 C -3.198960 1.809937 -0.398286  
 C -4.556057 1.452265 -0.232538  
 H -4.948009 1.162206 0.753387  
 C -5.414699 1.450309 -1.343551  
 H -6.468477 1.160418 -1.212878  
 C -4.932201 1.806950 -2.616219  
 H -5.609506 1.791911 -3.483986  
 C -3.583940 2.171381 -2.783468  
 H -3.201551 2.448017 -3.777798  
 C -2.714740 2.161773 -1.683153  
 H -1.656572 2.428892 -1.825704  
 C -1.275877 3.228848 1.414944  
 C -1.496708 4.382952 0.631333  
 H -2.187861 4.357001 -0.224283  
 C -0.824053 5.576458 0.945657  
 H -0.996317 6.473389 0.330814  
 C 0.060611 5.626349 2.037894  
 H 0.589557 6.562380 2.275846  
 C 0.268736 4.480312 2.827648  
 H 0.959171 4.514742 3.684433  
 C -0.390925 3.280874 2.518610  
 H -0.193464 2.385014 3.128365  
 C -1.499783 -3.006760 1.375970  
 C -1.623303 -4.137979 0.539341  
 H -2.169895 -4.069553 -0.413707  
 C -1.032470 -5.353730 0.923955  
 H -1.129677 -6.235152 0.271514  
 C -0.314183 -5.441511 2.130291  
 H 0.155185 -6.393704 2.422880  
 C -0.195063 -4.313908 2.964739  
 H 0.365595 -4.380746 3.909870  
 C -0.785256 -3.096152 2.592780  
 H -0.675905 -2.214455 3.243411

|          |           |           |           |   |           |           |           |
|----------|-----------|-----------|-----------|---|-----------|-----------|-----------|
| C        | -3.257146 | -1.663888 | -0.568570 | H | -2.022223 | 0.388302  | 2.921038  |
| C        | -2.902099 | -1.254133 | -1.872458 | H | -3.140636 | 1.769032  | 2.803429  |
| H        | -1.928744 | -0.779135 | -2.070807 | C | -2.208678 | -2.529597 | 1.150265  |
| C        | -3.808833 | -1.424935 | -2.931319 | C | -2.158938 | -2.593412 | 2.560053  |
| H        | -3.534900 | -1.083485 | -3.940982 | H | -2.432390 | -1.725438 | 3.177483  |
| C        | -5.063289 | -2.013948 | -2.695693 | C | -1.755182 | -3.781927 | 3.196441  |
| H        | -5.775965 | -2.140318 | -3.525472 | H | -1.718020 | -3.821737 | 4.296324  |
| C        | -5.411725 | -2.438461 | -1.399771 | C | -1.404437 | -4.911820 | 2.435629  |
| H        | -6.391163 | -2.906273 | -1.214561 | H | -1.089211 | -5.839460 | 2.938335  |
| C        | -4.514386 | -2.265034 | -0.334169 | C | -1.455894 | -4.851708 | 1.030135  |
| H        | -4.793819 | -2.602834 | 0.676352  | H | -1.180452 | -5.731353 | 0.427691  |
| C        | 1.836634  | 2.803575  | 0.064147  | C | -1.848474 | -3.666013 | 0.389028  |
| H        | 1.282384  | 3.755833  | -0.048538 | H | -1.869725 | -3.624982 | -0.711679 |
| H        | 1.784396  | 2.472490  | 1.119018  | C | -3.864330 | -1.565326 | -0.990653 |
| C        | 3.235912  | 2.855269  | -0.507066 | C | -5.215544 | -1.749017 | -0.617228 |
| H        | 3.849392  | 3.571468  | 0.080796  | H | -5.551967 | -1.524384 | 0.406611  |
| H        | 3.188605  | 3.236448  | -1.544565 | C | -6.143998 | -2.231400 | -1.555308 |
| C        | 5.015370  | 1.619562  | -1.569748 | H | -7.196057 | -2.367002 | -1.258839 |
| H        | 5.786791  | 0.861180  | -1.348804 | C | -5.732773 | -2.543198 | -2.864669 |
| H        | 5.516101  | 2.603615  | -1.435329 | H | -6.463648 | -2.921915 | -3.596464 |
| C        | 4.486392  | 1.456109  | -2.990081 | C | -4.387233 | -2.372465 | -3.235885 |
| H        | 5.325702  | 1.539334  | -3.709060 | H | -4.058557 | -2.618020 | -4.257962 |
| H        | 4.008538  | 0.463532  | -3.131298 | C | -3.455083 | -1.882859 | -2.304551 |
| H        | 3.737707  | 2.231044  | -3.251039 | H | -2.401492 | -1.749077 | -2.595131 |
| C        | 4.487357  | 1.245438  | 0.842152  | C | -2.114971 | 3.289707  | 0.372543  |
| H        | 3.638818  | 1.333605  | 1.551150  | C | -1.586029 | 3.833056  | -0.821685 |
| H        | 5.213219  | 2.054314  | 1.080003  | H | -0.754419 | 3.327869  | -1.337707 |
| C        | 5.156382  | -0.112268 | 1.040534  | C | -2.114876 | 5.018186  | -1.358765 |
| H        | 6.058205  | -0.222390 | 0.404268  | H | -1.688097 | 5.433349  | -2.285157 |
| H        | 5.535728  | -0.114538 | 2.083190  | C | -3.190662 | 5.662444  | -0.721622 |
| C        | 4.242996  | -1.327402 | 0.917132  | H | -3.612708 | 6.586010  | -1.148095 |
| H        | 4.782106  | -2.229695 | 1.276191  | C | -3.729119 | 5.120488  | 0.459250  |
| H        | 3.352475  | -1.199380 | 1.567301  | H | -4.574485 | 5.617234  | 0.960852  |
| C        | 4.815216  | -1.775017 | -1.499035 | C | -3.193000 | 3.942955  | 1.009818  |
| H        | 5.334434  | -0.811734 | -1.604218 | H | -3.627813 | 3.542330  | 1.937461  |
| H        | 4.290331  | -1.959565 | -2.456578 | C | 0.071633  | 2.254417  | 2.048138  |
| C        | 5.840637  | -2.871754 | -1.211401 | C | 0.411903  | 1.578963  | 3.247654  |
| H        | 6.564600  | -2.890555 | -2.051042 | H | -0.287873 | 0.870861  | 3.717468  |
| H        | 6.411742  | -2.673200 | -0.282373 | C | 1.653043  | 1.815141  | 3.869633  |
| H        | 5.384562  | -3.878907 | -1.139124 | H | 1.901002  | 1.279575  | 4.799058  |
| C        | 2.930259  | -2.899520 | -0.441263 | C | 2.570386  | 2.715564  | 3.303524  |
| H        | 3.456557  | -3.642458 | 0.193286  | H | 3.548190  | 2.882248  | 3.780897  |
| H        | 2.908850  | -3.291726 | -1.476697 | C | 2.234143  | 3.398367  | 2.120508  |
| C        | 1.519135  | -2.699528 | 0.055096  | H | 2.942943  | 4.112857  | 1.673539  |
| H        | 1.465307  | -2.358303 | 1.105030  | C | 0.996022  | 3.173049  | 1.496665  |
| H        | 0.926676  | -3.629375 | -0.046979 | H | 0.756473  | 3.718179  | 0.571502  |
| H        | 0.760571  | 2.078751  | -2.085976 | C | 1.191991  | -2.538369 | 1.108425  |
| NiFeSH_H |           |           |           | H | 0.542297  | -2.964882 | 1.896144  |
| Ni       | 2.462118  | -0.263368 | -0.406746 | H | 1.002409  | -3.050872 | 0.145915  |
| Fe       | -0.873321 | 0.135128  | -0.497677 | C | 2.648170  | -2.505890 | 1.526725  |
| S        | 0.749530  | -0.782369 | 0.809410  | H | 3.021805  | -3.542354 | 1.669904  |
| S        | 1.058258  | 1.215914  | -1.240042 | H | 2.730333  | -1.995723 | 2.505584  |
| P        | -2.628234 | -0.980592 | 0.242319  | C | 4.701839  | -1.219706 | 1.302836  |
| P        | -1.380407 | 1.735817  | 1.034029  | H | 5.521115  | -1.029949 | 0.586000  |
| O        | -2.350867 | 1.218421  | -2.732928 | H | 5.075327  | -2.005846 | 1.996361  |
| N        | 3.538098  | -1.789320 | 0.538533  | C | 4.344698  | 0.060477  | 2.049820  |
| N        | 3.684534  | 0.074076  | -1.997425 | H | 5.231450  | 0.433077  | 2.600730  |
| C        | -1.768715 | 0.787468  | -1.808342 | H | 4.014543  | 0.858704  | 1.350748  |
| C        | -3.585953 | 0.106674  | 1.422041  | H | 3.530944  | -0.091061 | 2.786514  |
| H        | -4.251093 | 0.720900  | 0.778116  | C | 3.981316  | -2.786279 | -0.488439 |
| H        | -4.223282 | -0.501472 | 2.095281  | H | 3.063103  | -3.273945 | -0.875108 |
| C        | -2.615461 | 0.995675  | 2.208880  | H | 4.584266  | -3.565627 | 0.028998  |

|         |           |           |           |       |           |           |           |
|---------|-----------|-----------|-----------|-------|-----------|-----------|-----------|
| C       | 4.776308  | -2.223947 | -1.661886 | H     | 0.909000  | 3.295320  | 1.504079  |
| H       | 5.736670  | -1.777314 | -1.331955 | C     | 2.552519  | 4.690236  | 1.747114  |
| H       | 5.060822  | -3.095881 | -2.286624 | H     | 2.128397  | 5.130489  | 2.663172  |
| C       | 4.012913  | -1.272763 | -2.574953 | C     | 3.784934  | 5.146554  | 1.244939  |
| H       | 4.596386  | -1.113456 | -3.506839 | H     | 4.332241  | 5.947512  | 1.766439  |
| H       | 3.045451  | -1.729252 | -2.872053 | C     | 4.317580  | 4.571966  | 0.077294  |
| C       | 4.886497  | 0.854499  | -1.537806 | H     | 5.284636  | 4.919722  | -0.319045 |
| H       | 5.320274  | 0.334904  | -0.667093 | C     | 3.620668  | 3.551634  | -0.594945 |
| H       | 4.488657  | 1.816429  | -1.158421 | H     | 4.056046  | 3.124525  | -1.510522 |
| C       | 5.966578  | 1.084364  | -2.593988 | C     | 0.159435  | 2.644371  | -1.915894 |
| H       | 6.757092  | 1.724004  | -2.151556 | C     | -0.233188 | 2.171074  | -3.189749 |
| H       | 6.444387  | 0.136910  | -2.914518 | H     | 0.272974  | 1.311332  | -3.651364 |
| H       | 5.577532  | 1.603957  | -3.492679 | C     | -1.284983 | 2.790995  | -3.886621 |
| C       | 2.957667  | 0.871053  | -3.068388 | H     | -1.574087 | 2.411907  | -4.879504 |
| H       | 3.329036  | 0.568526  | -4.068933 | C     | -1.965517 | 3.883300  | -3.320182 |
| H       | 3.214775  | 1.938881  | -2.926418 | H     | -2.792838 | 4.364034  | -3.865648 |
| C       | 1.456060  | 0.697415  | -2.963469 | C     | -1.578599 | 4.362700  | -2.055607 |
| H       | 1.126440  | -0.350836 | -3.104177 | H     | -2.098122 | 5.223405  | -1.605737 |
| H       | 0.912399  | 1.347340  | -3.678922 | C     | -0.524171 | 3.749588  | -1.357733 |
| H       | 0.912726  | -0.289866 | 2.095222  | H     | -0.235991 | 4.146489  | -0.373605 |
| H       | -0.615068 | -1.060177 | -1.414064 | C     | -1.228059 | -2.245515 | -1.368493 |
| NiFe-OH |           |           |           | H     | -0.635727 | -2.672822 | -2.200554 |
| Ni      | -2.518104 | -0.129134 | 0.245486  | H     | -0.909164 | -2.719661 | -0.419758 |
| Fe      | 0.726695  | 0.087716  | 0.449422  | C     | -2.708727 | -2.378819 | -1.645819 |
| S       | -0.907011 | -0.441215 | -1.257410 | H     | -3.007167 | -3.446221 | -1.743262 |
| S       | -1.132896 | 1.361840  | 1.034263  | H     | -2.940253 | -1.884123 | -2.608408 |
| P       | 2.441044  | -1.117269 | -0.327570 | C     | -4.860256 | -1.350639 | -1.204660 |
| P       | 1.426106  | 1.739226  | -0.917695 | H     | -5.619534 | -1.260561 | -0.406643 |
| O       | 2.266406  | 0.997121  | 2.728236  | H     | -5.195693 | -2.196430 | -1.846507 |
| N       | -3.553105 | -1.733640 | -0.573659 | C     | -4.776846 | -0.052250 | -1.999983 |
| N       | -3.688618 | 0.144864  | 1.926661  | H     | -5.769662 | 0.187209  | -2.431724 |
| C       | 1.663129  | 0.638662  | 1.783369  | H     | -4.464278 | 0.791200  | -1.348203 |
| C       | 3.483348  | -0.024339 | -1.425896 | H     | -4.048041 | -0.117627 | -2.832680 |
| H       | 4.181145  | 0.504921  | -0.742249 | C     | -3.742011 | -2.748097 | 0.512693  |
| H       | 4.088461  | -0.629390 | -2.130522 | H     | -2.726423 | -3.086698 | 0.805804  |
| C       | 2.576056  | 0.971585  | -2.156767 | H     | -4.272723 | -3.625086 | 0.076986  |
| H       | 1.925528  | 0.448425  | -2.886286 | C     | -4.486169 | -2.277444 | 1.758409  |
| H       | 3.145514  | 1.737252  | -2.720683 | H     | -5.530108 | -1.982167 | 1.525293  |
| C       | 2.022780  | -2.604090 | -1.330679 | H     | -4.576959 | -3.165841 | 2.417577  |
| C       | 1.989732  | -2.576057 | -2.742697 | C     | -3.784847 | -1.201124 | 2.577000  |
| H       | 2.283200  | -1.673826 | -3.299208 | H     | -4.303809 | -1.086838 | 3.553901  |
| C       | 1.569493  | -3.710118 | -3.460923 | H     | -2.744828 | -1.519500 | 2.799845  |
| H       | 1.547526  | -3.677717 | -4.561631 | C     | -5.019072 | 0.729529  | 1.547096  |
| C       | 1.177098  | -4.877010 | -2.779971 | H     | -5.457622 | 0.096202  | 0.759703  |
| H       | 0.844634  | -5.761496 | -3.345773 | H     | -4.791797 | 1.704010  | 1.070599  |
| C       | 1.215199  | -4.910803 | -1.373488 | C     | -6.027523 | 0.899132  | 2.684680  |
| H       | 0.913222  | -5.821872 | -0.833225 | H     | -6.943208 | 1.371225  | 2.273718  |
| C       | 1.635024  | -3.782237 | -0.651050 | H     | -6.325212 | -0.073025 | 3.127122  |
| H       | 1.651629  | -3.814048 | 0.449289  | H     | -5.649658 | 1.552657  | 3.496477  |
| C       | 3.627692  | -1.810736 | 0.901166  | C     | -3.016063 | 1.083385  | 2.903899  |
| C       | 4.965946  | -2.081522 | 0.535035  | H     | -3.358577 | 0.852872  | 3.935309  |
| H       | 5.321302  | -1.872228 | -0.485994 | H     | -3.349111 | 2.112370  | 2.662937  |
| C       | 5.854872  | -2.628546 | 1.476112  | C     | -1.508031 | 1.009062  | 2.800053  |
| H       | 6.898216  | -2.831071 | 1.186551  | H     | -1.098273 | 0.008715  | 3.044792  |
| C       | 5.414360  | -2.919320 | 2.781158  | H     | -1.014625 | 1.769895  | 3.438306  |
| H       | 6.113759  | -3.349079 | 3.515702  | O     | 0.117243  | -1.522992 | 1.501712  |
| C       | 4.080148  | -2.662171 | 3.143984  | H     | -0.860961 | -1.501834 | 1.416437  |
| H       | 3.729386  | -2.891797 | 4.162640  | OH    |           |           |           |
| C       | 3.187582  | -2.107239 | 2.209689  | O     | 0.000000  | 0.000000  | 0.109076  |
| H       | 2.140646  | -1.907488 | 2.485316  | H     | 0.000000  | 0.000000  | -0.872609 |
| C       | 2.383817  | 3.087388  | -0.095757 | TS-23 |           |           |           |
| C       | 1.861642  | 3.660413  | 1.088372  | Ni    | 2.479172  | -0.060966 | -0.215615 |

|    |           |           |           |         |           |           |           |
|----|-----------|-----------|-----------|---------|-----------|-----------|-----------|
| Fe | -0.649353 | 0.144082  | -0.349260 | C       | 2.713083  | -2.371485 | 1.597082  |
| S  | 0.915961  | -0.408486 | 1.319678  | H       | 2.999999  | -3.444174 | 1.663407  |
| S  | 1.127970  | 1.518158  | -0.864372 | H       | 2.997105  | -1.894930 | 2.554655  |
| P  | -2.330654 | -1.246479 | 0.250136  | C       | 4.866498  | -1.402368 | 1.072468  |
| P  | -1.589802 | 1.718097  | 0.887788  | H       | 5.590629  | -1.318405 | 0.242633  |
| O  | -2.159804 | 0.889952  | -2.727297 | H       | 5.195804  | -2.281713 | 1.670129  |
| N  | 3.514247  | -1.718826 | 0.495851  | C       | 4.874946  | -0.130231 | 1.912417  |
| N  | 3.610124  | 0.272854  | -1.920657 | H       | 5.896409  | 0.050412  | 2.303659  |
| C  | -1.568121 | 0.602889  | -1.759395 | H       | 4.573437  | 0.749295  | 1.305539  |
| C  | -3.574329 | -0.188190 | 1.149473  | H       | 4.184752  | -0.194208 | 2.777360  |
| H  | -4.203113 | 0.268247  | 0.355960  | C       | 3.614812  | -2.692003 | -0.641342 |
| H  | -4.222624 | -0.817733 | 1.790925  | H       | 2.577678  | -2.993272 | -0.892346 |
| C  | -2.848165 | 0.887543  | 1.961094  | H       | 4.145055  | -3.598069 | -0.270146 |
| H  | -2.277475 | 0.439808  | 2.797609  | C       | 4.309519  | -2.188631 | -1.905410 |
| H  | -3.540107 | 1.630333  | 2.405407  | H       | 5.377833  | -1.955338 | -1.718305 |
| C  | -1.954926 | -2.664910 | 1.357311  | H       | 4.321920  | -3.047303 | -2.608692 |
| C  | -1.968267 | -2.532176 | 2.763848  | C       | 3.623051  | -1.042344 | -2.641214 |
| H  | -2.271572 | -1.589436 | 3.241990  | H       | 4.112766  | -0.899517 | -3.629115 |
| C  | -1.581268 | -3.613419 | 3.574629  | H       | 2.564764  | -1.305898 | -2.841648 |
| H  | -1.595983 | -3.502102 | 4.670066  | C       | 4.980404  | 0.779364  | -1.565135 |
| C  | -1.174092 | -4.827687 | 2.991937  | H       | 5.425274  | 0.079744  | -0.841575 |
| H  | -0.866137 | -5.670173 | 3.630779  | H       | 4.816212  | 1.729829  | -1.020318 |
| C  | -1.165513 | -4.964077 | 1.591433  | C       | 5.944560  | 0.978063  | -2.735532 |
| H  | -0.852175 | -5.913187 | 1.129177  | H       | 6.898942  | 1.377494  | -2.335972 |
| C  | -1.554265 | -3.889379 | 0.775546  | H       | 6.174480  | 0.024999  | -3.253282 |
| H  | -1.535732 | -4.000978 | -0.320330 | H       | 5.566214  | 1.702385  | -3.484337 |
| C  | -3.278573 | -2.049383 | -1.107700 | C       | 2.947235  | 1.302711  | -2.808997 |
| C  | -4.613665 | -2.458450 | -0.886853 | H       | 3.247408  | 1.132504  | -3.864511 |
| H  | -5.100028 | -2.281691 | 0.084976  | H       | 3.329660  | 2.297949  | -2.507891 |
| C  | -5.328233 | -3.102998 | -1.910168 | C       | 1.440370  | 1.287003  | -2.672892 |
| H  | -6.370147 | -3.413433 | -1.733974 | H       | 0.985147  | 0.333279  | -3.001884 |
| C  | -4.715932 | -3.354778 | -3.152534 | H       | 0.969318  | 2.121101  | -3.230705 |
| H  | -5.279079 | -3.862287 | -3.951475 | H       | 0.146782  | -1.882163 | -1.693190 |
| C  | -3.384769 | -2.959088 | -3.371543 | H       | 0.801030  | -1.499377 | -1.461409 |
| H  | -2.898815 | -3.155545 | -4.340006 | TS-4a4b |           |           |           |
| C  | -2.668124 | -2.305430 | -2.353929 | Ni      | -1.461056 | -1.840987 | 0.568553  |
| H  | -1.627696 | -1.993525 | -2.534274 | Fe      | 0.800455  | 0.162988  | -0.632367 |
| C  | -2.460463 | 3.023322  | -0.072694 | S       | 0.187172  | -0.702410 | 1.513247  |
| C  | -1.806185 | 3.625188  | -1.173813 | S       | -0.064661 | -1.949254 | -1.082336 |
| H  | -0.792904 | 3.303707  | -1.461396 | P       | 1.758429  | 2.057049  | 0.084518  |
| C  | -2.445018 | 4.629746  | -1.916399 | P       | 2.882752  | -0.716760 | -0.612197 |
| H  | -1.921180 | 5.092646  | -2.766973 | O       | 1.102051  | 0.935630  | -3.419968 |
| C  | -3.750361 | 5.032810  | -1.580517 | N       | -2.674465 | -1.430773 | 2.199404  |
| H  | -4.255113 | 5.815320  | -2.168424 | N       | -2.895590 | -2.710279 | -0.639950 |
| C  | -4.410612 | 4.429581  | -0.495921 | C       | 1.005427  | 0.619764  | -2.294389 |
| H  | -5.434563 | 4.735776  | -0.230640 | C       | 3.631430  | 1.930855  | -0.083732 |
| C  | -3.771240 | 3.431290  | 0.260049  | H       | 4.003148  | 2.865777  | -0.547124 |
| H  | -4.307948 | 2.979960  | 1.106905  | H       | 4.044475  | 1.884632  | 0.942482  |
| C  | -0.442400 | 2.607423  | 2.018521  | C       | 4.037637  | 0.706866  | -0.909408 |
| C  | -0.100250 | 2.043097  | 3.270192  | H       | 5.087779  | 0.399481  | -0.727118 |
| H  | -0.559990 | 1.104215  | 3.612161  | H       | 3.929816  | 0.904546  | -1.997049 |
| C  | 0.844646  | 2.675394  | 4.094750  | C       | 1.487678  | 2.482297  | 1.853050  |
| H  | 1.097019  | 2.229383  | 5.069347  | C       | 2.148182  | 1.732571  | 2.853903  |
| C  | 1.468010  | 3.864683  | 3.676215  | H       | 2.855363  | 0.934221  | 2.580676  |
| H  | 2.213549  | 4.354396  | 4.322153  | C       | 1.882137  | 1.982779  | 4.210202  |
| C  | 1.133694  | 4.428016  | 2.431475  | H       | 2.400423  | 1.393703  | 4.982832  |
| H  | 1.612074  | 5.362338  | 2.098764  | C       | 0.949577  | 2.971912  | 4.577920  |
| C  | 0.183812  | 3.805793  | 1.604546  | H       | 0.738913  | 3.163140  | 5.641829  |
| H  | -0.067959 | 4.268785  | 0.639565  | C       | 0.281181  | 3.708148  | 3.582687  |
| C  | 1.221568  | -2.226905 | 1.400131  | H       | -0.457995 | 4.475403  | 3.861463  |
| H  | 0.673423  | -2.648488 | 2.264336  | C       | 0.544442  | 3.465177  | 2.223516  |
| H  | 0.855186  | -2.706808 | 0.474759  | H       | -0.002251 | 4.031775  | 1.456133  |

|   |           |           |           |         |           |           |           |
|---|-----------|-----------|-----------|---------|-----------|-----------|-----------|
| C | 1.303788  | 3.609835  | -0.797941 | C       | -2.350050 | -2.934883 | -2.030956 |
| C | 2.024449  | 4.796437  | -0.519623 | H       | -3.189211 | -2.954940 | -2.759053 |
| H | 2.843417  | 4.790678  | 0.217983  | H       | -1.870880 | -3.934543 | -2.041334 |
| C | 1.688486  | 5.994708  | -1.168432 | C       | -1.336143 | -1.878900 | -2.415295 |
| H | 2.253524  | 6.913237  | -0.944963 | H       | -1.762121 | -0.856435 | -2.440423 |
| C | 0.630012  | 6.022361  | -2.097984 | H       | -0.853213 | -2.109703 | -3.386581 |
| H | 0.366229  | 6.963099  | -2.606231 | H       | -0.812830 | 0.704301  | -1.009021 |
| C | -0.098937 | 4.850270  | -2.361404 | H       | -0.474846 | 1.019080  | -0.245302 |
| H | -0.951083 | 4.865367  | -3.057157 | P       | -2.989893 | 2.134505  | -0.984494 |
| C | 0.231010  | 3.646893  | -1.709996 | O       | -2.207390 | 2.481893  | 0.337454  |
| H | -0.374215 | 2.751444  | -1.905464 | O       | -4.459837 | 1.700159  | -0.720030 |
| C | 3.393267  | -1.946328 | -1.891148 | O       | -3.053480 | 3.573557  | -1.850715 |
| C | 2.659160  | -2.134383 | -3.081911 | O       | -2.202613 | 1.136193  | -1.909710 |
| H | 1.730379  | -1.577326 | -3.265469 | H       | -2.759576 | 4.301047  | -1.230144 |
| C | 3.108821  | -3.045978 | -4.053348 | O       | -5.885693 | 0.199937  | -2.383068 |
| H | 2.524210  | -3.187502 | -4.975827 | H       | -6.437210 | -0.283295 | -1.738264 |
| C | 4.292629  | -3.775830 | -3.845653 | H       | -5.313816 | 0.773610  | -1.774962 |
| H | 4.640572  | -4.492277 | -4.606433 | O       | -2.016674 | 5.087857  | 0.247086  |
| C | 5.030257  | -3.590404 | -2.661701 | H       | -1.153252 | 5.246333  | -0.185554 |
| H | 5.959059  | -4.157623 | -2.492283 | H       | -2.005694 | 4.080611  | 0.414946  |
| C | 4.583225  | -2.683116 | -1.686681 | TS-6a6b |           |           |           |
| H | 5.163807  | -2.549887 | -0.759896 | Ni      | -1.389627 | -1.683375 | 0.769501  |
| C | 3.383509  | -1.542007 | 0.949558  | Fe      | 0.592844  | 0.072295  | -0.549952 |
| C | 4.368039  | -1.025380 | 1.817225  | S       | 0.102162  | -0.358084 | 1.742989  |
| H | 4.923931  | -0.111331 | 1.561444  | S       | 0.389365  | -2.259957 | -0.406277 |
| C | 4.654332  | -1.685247 | 3.027175  | P       | 0.875602  | 2.273551  | -0.426829 |
| H | 5.423019  | -1.274036 | 3.700149  | P       | 2.873451  | -0.031576 | -0.340040 |
| C | 3.969974  | -2.863952 | 3.371839  | O       | 0.918356  | 0.022029  | -3.439000 |
| H | 4.197581  | -3.376955 | 4.319525  | N       | -2.793908 | -0.974421 | 2.015473  |
| C | 2.996840  | -3.390291 | 2.500808  | N       | -2.479710 | -2.897918 | -0.365917 |
| H | 2.459218  | -4.315216 | 2.762335  | C       | 0.812993  | 0.060543  | -2.273603 |
| C | 2.700183  | -2.730851 | 1.298422  | C       | 2.496871  | 2.597265  | -1.281663 |
| H | 1.931586  | -3.144188 | 0.624409  | H       | 2.360698  | 2.339375  | -2.352426 |
| C | -0.970420 | 0.404079  | 2.431815  | H       | 2.765876  | 3.669939  | -1.204444 |
| H | -0.392607 | 0.986574  | 3.173559  | C       | 3.550412  | 1.698228  | -0.618942 |
| H | -1.468872 | 1.101374  | 1.727869  | H       | 3.811930  | 2.102047  | 0.379891  |
| C | -1.926381 | -0.525526 | 3.144926  | H       | 4.487869  | 1.649259  | -1.207021 |
| H | -2.662524 | 0.051515  | 3.747997  | C       | 1.118831  | 3.093659  | 1.211164  |
| H | -1.355674 | -1.164305 | 3.846534  | C       | 1.837304  | 2.423375  | 2.228300  |
| C | -3.107107 | -2.630803 | 2.990280  | H       | 2.195377  | 1.394050  | 2.080488  |
| H | -3.966106 | -3.097108 | 2.474967  | C       | 2.076275  | 3.049857  | 3.461916  |
| H | -3.501038 | -2.274682 | 3.969032  | H       | 2.633338  | 2.510451  | 4.243685  |
| C | -1.991185 | -3.651660 | 3.183300  | C       | 1.597213  | 4.351131  | 3.697314  |
| H | -2.372520 | -4.520658 | 3.756752  | H       | 1.775712  | 4.838961  | 4.668487  |
| H | -1.615336 | -4.014147 | 2.203395  | C       | 0.887922  | 5.026654  | 2.688036  |
| H | -1.128766 | -3.228991 | 3.736824  | H       | 0.512558  | 6.047186  | 2.863120  |
| C | -3.848318 | -0.668126 | 1.664866  | C       | 0.651723  | 4.406076  | 1.448801  |
| H | -3.449878 | 0.273315  | 1.236575  | H       | 0.098733  | 4.950267  | 0.668259  |
| H | -4.501768 | -0.393612 | 2.524679  | C       | -0.434905 | 3.231369  | -1.262726 |
| C | -4.686707 | -1.370189 | 0.598249  | C       | -0.270642 | 3.769717  | -2.556243 |
| H | -5.196945 | -2.269703 | 1.000434  | H       | 0.698308  | 3.706762  | -3.074087 |
| H | -5.496101 | -0.658195 | 0.337664  | C       | -1.360489 | 4.387347  | -3.196754 |
| C | -3.972158 | -1.672679 | -0.714378 | H       | -1.230846 | 4.803470  | -4.208186 |
| H | -4.717093 | -1.975554 | -1.480075 | C       | -2.609146 | 4.468346  | -2.554744 |
| H | -3.499001 | -0.744636 | -1.091447 | H       | -3.462315 | 4.940074  | -3.066720 |
| C | -3.366309 | -4.030971 | -0.106542 | C       | -2.773269 | 3.932102  | -1.263920 |
| H | -3.679463 | -3.883695 | 0.938271  | H       | -3.755753 | 3.941773  | -0.767855 |
| H | -2.471949 | -4.684551 | -0.076598 | C       | -1.692878 | 3.309692  | -0.622580 |
| C | -4.503590 | -4.697318 | -0.883190 | H       | -1.830698 | 2.868297  | 0.377158  |
| H | -4.756088 | -5.654541 | -0.382886 | C       | 3.653500  | -0.635294 | 1.217084  |
| H | -5.421042 | -4.074748 | -0.893625 | C       | 3.097465  | -1.754233 | 1.879071  |
| H | -4.227943 | -4.930466 | -1.931151 | H       | 2.209637  | -2.257989 | 1.468743  |



|   |           |           |           |         |           |           |           |
|---|-----------|-----------|-----------|---------|-----------|-----------|-----------|
| C | 3.675914  | -2.238199 | 3.064500  | H       | -0.999425 | 0.331388  | -1.344602 |
| H | 3.231020  | -3.110806 | 3.567824  | O       | -5.166997 | 2.160539  | 0.305649  |
| C | 4.809066  | -1.606732 | 3.606301  | H       | -6.011029 | 2.081249  | -0.180626 |
| H | 5.257403  | -1.980982 | 4.540053  | H       | -4.551498 | 1.594288  | -0.257124 |
| C | 5.370870  | -0.496672 | 2.949573  | TS-7a7b |           |           |           |
| H | 6.263333  | -0.001494 | 3.363345  | Ni      | 0.026753  | -2.368684 | -0.121152 |
| C | 4.801579  | -0.012826 | 1.759248  | Fe      | 0.829467  | 0.807286  | -0.505458 |
| H | 5.266182  | 0.850287  | 1.259696  | S       | 0.140931  | -0.635001 | 1.255044  |
| C | 3.626157  | -1.083732 | -1.653264 | S       | 1.550123  | -1.291838 | -1.213644 |
| C | 3.755870  | -2.477866 | -1.458693 | P       | 0.256033  | 2.740641  | 0.486826  |
| H | 3.506437  | -2.934768 | -0.489675 | P       | 2.879059  | 1.115632  | 0.383984  |
| C | 4.217396  | -3.296050 | -2.504034 | O       | 1.464677  | 2.156326  | -3.003485 |
| H | 4.318821  | -4.380312 | -2.339279 | N       | -1.558355 | -3.106562 | 0.996278  |
| C | 4.552365  | -2.734700 | -3.749665 | N       | 0.027573  | -3.785876 | -1.626649 |
| H | 4.914634  | -3.378109 | -4.566840 | C       | 1.242725  | 1.620839  | -1.983358 |
| C | 4.425642  | -1.347817 | -3.946461 | C       | 1.723619  | 3.450376  | 1.395357  |
| H | 4.687101  | -0.899368 | -4.917843 | H       | 1.677673  | 4.557154  | 1.395830  |
| C | 3.961557  | -0.523693 | -2.906872 | H       | 1.603278  | 3.136662  | 2.449422  |
| H | 3.850345  | 0.556198  | -3.088797 | C       | 3.032629  | 2.921673  | 0.806387  |
| C | -1.090769 | 0.795313  | 2.560028  | H       | 3.896432  | 3.084640  | 1.483007  |
| H | -0.946152 | 0.642620  | 3.648579  | H       | 3.259726  | 3.407506  | -0.166480 |
| H | -0.820822 | 1.842642  | 2.325478  | C       | -1.077329 | 2.677892  | 1.759852  |
| C | -2.504140 | 0.499231  | 2.106731  | C       | -0.773159 | 2.146135  | 3.037171  |
| H | -3.240347 | 0.992253  | 2.780207  | H       | 0.251341  | 1.828777  | 3.287399  |
| H | -2.664670 | 0.896532  | 1.086504  | C       | -1.788236 | 1.972626  | 3.992660  |
| C | -2.541749 | -1.726771 | 3.302922  | H       | -1.537457 | 1.553046  | 4.979179  |
| H | -1.448971 | -1.741848 | 3.477400  | C       | -3.119046 | 2.311073  | 3.683555  |
| H | -2.831435 | -2.777160 | 3.101969  | H       | -3.916702 | 2.158193  | 4.426928  |
| C | -3.250204 | -1.195982 | 4.550405  | C       | -3.426514 | 2.838747  | 2.415805  |
| H | -2.971779 | -1.843169 | 5.407037  | H       | -4.464160 | 3.100461  | 2.152945  |
| H | -2.937098 | -0.161905 | 4.799529  | C       | -2.411277 | 3.027934  | 1.460194  |
| H | -4.355002 | -1.216687 | 4.465399  | H       | -2.680350 | 3.434001  | 0.475718  |
| C | -4.232776 | -1.105310 | 1.613769  | C       | -0.265669 | 3.979162  | -0.775463 |
| H | -4.458604 | -0.271569 | 0.925178  | C       | 0.427647  | 5.194656  | -0.961158 |
| H | -4.859605 | -0.943302 | 2.515387  | H       | 1.265539  | 5.477083  | -0.307082 |
| C | -4.600613 | -2.421662 | 0.944846  | C       | 0.062600  | 6.065458  | -2.004290 |
| H | -5.698278 | -2.408760 | 0.783048  | H       | 0.615896  | 7.007940  | -2.140725 |
| H | -4.402033 | -3.292184 | 1.603877  | C       | -0.997052 | 5.736087  | -2.866593 |
| C | -3.938174 | -2.574789 | -0.417438 | H       | -1.280383 | 6.420514  | -3.681651 |
| H | -4.449294 | -3.357249 | -1.017427 | C       | -1.688802 | 4.523685  | -2.688044 |
| H | -4.027611 | -1.619897 | -0.970486 | H       | -2.518918 | 4.253771  | -3.359703 |
| C | -2.238091 | -4.277211 | 0.200202  | C       | -1.320312 | 3.641509  | -1.660079 |
| H | -2.586441 | -4.248043 | 1.251230  | H       | -1.867460 | 2.691387  | -1.548618 |
| H | -1.143205 | -4.425583 | 0.255234  | C       | 4.402793  | 0.767468  | -0.590000 |
| C | -2.886167 | -5.440005 | -0.551195 | C       | 4.361159  | 0.493559  | -1.972927 |
| H | -2.578015 | -6.384928 | -0.059011 | H       | 3.401001  | 0.444908  | -2.504962 |
| H | -3.993537 | -5.400843 | -0.530366 | C       | 5.553489  | 0.267812  | -2.683608 |
| H | -2.554633 | -5.492250 | -1.608131 | H       | 5.509847  | 0.049570  | -3.762144 |
| C | -1.948571 | -2.721675 | -1.764939 | C       | 6.792099  | 0.314339  | -2.019721 |
| H | -2.132957 | -1.664059 | -2.035452 | H       | 7.724370  | 0.133496  | -2.577753 |
| H | -2.523565 | -3.359770 | -2.472486 | C       | 6.838759  | 0.587360  | -0.639529 |
| C | -0.464807 | -3.012754 | -1.862159 | H       | 7.806022  | 0.623451  | -0.114051 |
| H | -0.040414 | -2.588358 | -2.792741 | C       | 5.650329  | 0.810104  | 0.075119  |
| H | -0.231977 | -4.096326 | -1.837704 | H       | 5.692794  | 1.012733  | 1.157513  |
| H | -1.012835 | 0.226833  | -0.446952 | C       | 3.139473  | 0.139321  | 1.921242  |
| C | -4.172425 | 1.468005  | -3.191581 | C       | 2.988318  | 0.692260  | 3.210125  |
| H | -4.873188 | 2.121652  | -2.636450 | H       | 2.853349  | 1.774357  | 3.349115  |
| H | -3.704328 | 2.025253  | -4.024886 | C       | 3.007998  | -0.143684 | 4.341865  |
| H | -4.759129 | 0.625275  | -3.617111 | H       | 2.888047  | 0.298183  | 5.343562  |
| C | -3.127036 | 0.889285  | -2.246580 | C       | 3.176109  | -1.532410 | 4.197615  |
| O | -3.477306 | 0.627943  | -1.050977 | H       | 3.178826  | -2.183749 | 5.085680  |
| O | -1.959995 | 0.648271  | -2.704115 | C       | 3.347596  | -2.085881 | 2.914948  |

|         |           |           |           |   |           |           |           |
|---------|-----------|-----------|-----------|---|-----------|-----------|-----------|
| H       | 3.485184  | -3.171593 | 2.792248  | C | -1.504216 | 0.618306  | -2.258813 |
| C       | 3.331811  | -1.256471 | 1.783068  | C | -3.757584 | 1.166892  | 0.682178  |
| H       | 3.451192  | -1.701044 | 0.782374  | H | -4.807795 | 1.079432  | 0.341547  |
| C       | -1.693561 | -0.638562 | 1.409363  | H | -3.768797 | 1.157214  | 1.789295  |
| H       | -2.007640 | 0.136792  | 2.130381  | C | -3.105702 | 2.439963  | 0.138527  |
| H       | -2.156394 | -0.408435 | 0.435264  | H | -3.394179 | 3.344353  | 0.712564  |
| C       | -2.043797 | -2.015798 | 1.924659  | H | -3.384536 | 2.609031  | -0.923335 |
| H       | -3.141895 | -2.111273 | 2.060835  | C | -2.764541 | -1.416110 | 1.653734  |
| H       | -1.574490 | -2.166824 | 2.915926  | C | -2.298272 | -0.834406 | 2.856711  |
| C       | -1.160802 | -4.288380 | 1.833058  | H | -2.050996 | 0.237252  | 2.900831  |
| H       | -1.159638 | -5.184367 | 1.185939  | C | -2.123108 | -1.626863 | 4.003333  |
| H       | -1.958399 | -4.458872 | 2.591190  | H | -1.755065 | -1.162510 | 4.931490  |
| C       | 0.206075  | -4.126436 | 2.492157  | C | -2.404909 | -3.005329 | 3.962583  |
| H       | 0.431998  | -5.022560 | 3.105007  | H | -2.260727 | -3.625537 | 4.861020  |
| H       | 1.003502  | -4.014642 | 1.727320  | C | -2.871081 | -3.587893 | 2.769917  |
| H       | 0.255272  | -3.236972 | 3.151951  | H | -3.097243 | -4.664949 | 2.730578  |
| C       | -2.690591 | -3.443856 | 0.072960  | C | -3.050939 | -2.799181 | 1.619244  |
| H       | -3.059157 | -2.486509 | -0.352165 | H | -3.420204 | -3.267137 | 0.692882  |
| H       | -3.521684 | -3.854975 | 0.690657  | C | -4.044717 | -1.265311 | -0.937972 |
| C       | -2.380332 | -4.427403 | -1.053375 | C | -5.348767 | -1.496350 | -0.436860 |
| H       | -2.095027 | -5.421935 | -0.651720 | H | -5.619062 | -1.167248 | 0.579697  |
| H       | -3.339193 | -4.596270 | -1.586552 | C | -6.302487 | -2.159936 | -1.224527 |
| C       | -1.379456 | -3.964594 | -2.106463 | H | -7.313470 | -2.335696 | -0.824446 |
| H       | -1.378079 | -4.690020 | -2.949160 | C | -5.966244 | -2.600109 | -2.519231 |
| H       | -1.697636 | -2.992306 | -2.534353 | H | -6.715869 | -3.119187 | -3.137193 |
| C       | 0.625051  | -5.046978 | -1.065809 | C | -4.671471 | -2.379133 | -3.018679 |
| H       | 0.064382  | -5.313429 | -0.154721 | H | -4.400020 | -2.725233 | -4.028398 |
| H       | 1.646623  | -4.773589 | -0.734637 | C | -3.712012 | -1.717258 | -2.230751 |
| C       | 0.659919  | -6.249431 | -2.010344 | H | -2.698864 | -1.565844 | -2.625388 |
| H       | 1.178373  | -7.084030 | -1.495670 | C | -0.750299 | 3.772229  | -0.881738 |
| H       | -0.356965 | -6.603384 | -2.274617 | C | -0.319569 | 3.700573  | -2.223235 |
| H       | 1.212832  | -6.039331 | -2.948073 | H | -0.225895 | 2.730552  | -2.729811 |
| C       | 0.879708  | -3.322625 | -2.791657 | C | 0.004246  | 4.874957  | -2.925995 |
| H       | 0.487889  | -3.754809 | -3.736391 | H | 0.344565  | 4.805537  | -3.971109 |
| H       | 1.899703  | -3.727570 | -2.639883 | C | -0.100133 | 6.128117  | -2.297017 |
| C       | 0.955905  | -1.809450 | -2.880251 | H | 0.157148  | 7.046172  | -2.848599 |
| H       | -0.020389 | -1.334731 | -3.085955 | C | -0.531035 | 6.206065  | -0.959432 |
| H       | 1.691049  | -1.485080 | -3.644708 | H | -0.615881 | 7.184235  | -0.460334 |
| H       | -0.716042 | 0.948428  | -0.725315 | C | -0.851903 | 5.035276  | -0.252758 |
| H       | -0.734900 | 0.285126  | -1.382734 | H | -1.181816 | 5.105395  | 0.796220  |
| O       | -1.855746 | -0.410188 | -2.236351 | C | -0.583766 | 2.641357  | 1.744500  |
| H       | -1.846469 | -1.247562 | -1.725798 | C | -1.391050 | 2.743424  | 2.896325  |
| H       | -2.582225 | 0.184317  | -1.701213 | H | -2.486631 | 2.677107  | 2.826758  |
| P       | -4.775008 | 0.522589  | -0.469791 | C | -0.796804 | 2.939895  | 4.157248  |
| O       | -3.368754 | 1.072774  | -0.948285 | H | -1.435371 | 3.014775  | 5.051423  |
| O       | -5.140610 | -0.827219 | -1.150118 | C | 0.600019  | 3.046824  | 4.274805  |
| O       | -4.590202 | 0.080821  | 1.153715  | H | 1.060797  | 3.200581  | 5.263276  |
| O       | -5.853645 | 1.640672  | -0.505118 | C | 1.408161  | 2.962544  | 3.125053  |
| H       | -4.197551 | 0.834833  | 1.646534  | H | 2.502437  | 3.049251  | 3.208262  |
| O       | -7.836776 | -0.205576 | -1.045435 | C | 0.821954  | 2.754375  | 1.867625  |
| H       | -6.998517 | -0.721227 | -1.193266 | H | 1.464925  | 2.672613  | 0.975799  |
| H       | -7.373149 | 0.647464  | -0.819100 | C | 0.578426  | -2.202391 | 1.558389  |
| TS-8a8b |           |           |           | H | -0.288746 | -2.557068 | 2.147952  |
| Ni      | 2.337806  | -0.440033 | 0.136673  | H | 0.634915  | -2.768640 | 0.612160  |
| Fe      | -0.822394 | 0.205360  | -0.723898 | C | 1.867762  | -2.298691 | 2.352642  |
| S       | 0.417974  | -0.397182 | 1.212595  | H | 2.064050  | -3.342037 | 2.681492  |
| S       | 1.327329  | 0.902305  | -1.234292 | H | 1.778968  | -1.680714 | 3.267102  |
| P       | -2.825875 | -0.379434 | 0.129063  | C | 4.035590  | -1.161043 | 2.472389  |
| P       | -1.256791 | 2.274042  | 0.072705  | H | 5.010917  | -1.124836 | 1.952032  |
| O       | -1.945922 | 0.871871  | -3.318805 | H | 4.173782  | -1.835099 | 3.348203  |
| N       | 3.043794  | -1.801179 | 1.544950  | C | 3.634451  | 0.243168  | 2.910078  |
| N       | 3.911747  | -0.517507 | -1.199982 | H | 4.386467  | 0.641608  | 3.621036  |

|         |           |           |           |
|---------|-----------|-----------|-----------|
| H       | 3.579420  | 0.927925  | 2.037590  |
| H       | 2.644961  | 0.262994  | 3.408291  |
| C       | 3.643089  | -2.989818 | 0.858244  |
| H       | 2.810971  | -3.509054 | 0.342742  |
| H       | 4.035883  | -3.676131 | 1.642569  |
| C       | 4.741861  | -2.698826 | -0.159097 |
| H       | 5.616762  | -2.201665 | 0.308716  |
| H       | 5.115650  | -3.686269 | -0.501780 |
| C       | 4.282721  | -1.952760 | -1.405433 |
| H       | 5.076152  | -2.006652 | -2.182495 |
| H       | 3.383450  | -2.450680 | -1.817110 |
| C       | 5.023822  | 0.317949  | -0.632178 |
| H       | 5.208808  | -0.020310 | 0.402969  |
| H       | 4.615424  | 1.345147  | -0.552863 |
| C       | 6.332873  | 0.308387  | -1.422127 |
| H       | 7.038254  | 1.022014  | -0.949535 |
| H       | 6.815454  | -0.689783 | -1.417134 |
| H       | 6.192303  | 0.623427  | -2.476163 |
| C       | 3.484660  | 0.046442  | -2.540567 |
| H       | 3.986627  | -0.509216 | -3.360724 |
| H       | 3.827855  | 1.098356  | -2.597347 |
| C       | 1.976634  | -0.000209 | -2.703223 |
| H       | 1.582973  | -1.033512 | -2.683018 |
| H       | 1.642166  | 0.500758  | -3.634464 |
| H       | -0.883759 | -1.903264 | -1.145090 |
| H       | -0.301239 | -1.119689 | -1.369034 |
| O       | 1.264856  | -3.674870 | -1.650826 |
| H       | 1.601367  | -4.581652 | -1.505295 |
| H       | 1.516891  | -3.453132 | -2.609375 |
| O       | -1.173846 | -3.189806 | -1.187128 |
| H       | -0.194516 | -3.511854 | -1.378387 |
| H       | -1.337074 | -3.411000 | -0.243871 |
| O       | 1.983053  | -3.068216 | -4.128790 |
| H       | 1.360343  | -2.399339 | -4.482632 |
| H       | 2.818001  | -2.562078 | -4.038131 |
| TS-9a9b |           |           |           |
| Ni      | 2.294530  | -0.805123 | -0.035234 |
| Fe      | -0.713903 | 0.417830  | -0.699201 |
| S       | 0.453333  | -0.517012 | 1.148638  |
| S       | 1.519618  | 0.848118  | -1.191623 |
| P       | -2.762653 | 0.099596  | 0.111535  |
| P       | -0.836342 | 2.485153  | 0.196734  |
| O       | -1.717601 | 1.254478  | -3.294133 |
| N       | 2.713876  | -2.479549 | 1.105586  |
| N       | 3.864582  | -0.934744 | -1.378714 |
| C       | -1.317991 | 0.946752  | -2.231255 |
| C       | -3.487012 | 1.730895  | 0.713138  |
| H       | -4.530528 | 1.814937  | 0.351441  |
| H       | -3.525017 | 1.677086  | 1.818588  |
| C       | -2.643450 | 2.917865  | 0.238120  |
| H       | -2.814529 | 3.830842  | 0.844450  |
| H       | -2.868558 | 3.167877  | -0.820599 |
| C       | -2.866833 | -1.018910 | 1.570215  |
| C       | -2.391553 | -0.568795 | 2.824376  |
| H       | -2.023347 | 0.461554  | 2.946137  |
| C       | -2.358945 | -1.445966 | 3.921002  |
| H       | -1.984970 | -1.087073 | 4.892653  |
| C       | -2.792219 | -2.777851 | 3.774653  |
| H       | -2.762875 | -3.465188 | 4.634756  |
| C       | -3.251552 | -3.230980 | 2.524465  |
| H       | -3.573531 | -4.276708 | 2.398630  |
| C       | -3.284480 | -2.359608 | 1.421271  |

|   |           |           |           |
|---|-----------|-----------|-----------|
| H | -3.597705 | -2.739422 | 0.437483  |
| C | -4.013762 | -0.616082 | -1.040246 |
| C | -5.388109 | -0.548303 | -0.709669 |
| H | -5.716441 | -0.051384 | 0.217143  |
| C | -6.347565 | -1.134533 | -1.550679 |
| H | -7.414847 | -1.074481 | -1.285313 |
| C | -5.945545 | -1.802226 | -2.723661 |
| H | -6.699392 | -2.262364 | -3.381995 |
| C | -4.580788 | -1.888144 | -3.046145 |
| H | -4.256714 | -2.424718 | -3.951640 |
| C | -3.616297 | -1.300586 | -2.208007 |
| H | -2.551550 | -1.404129 | -2.454192 |
| C | -0.075763 | 3.936699  | -0.652820 |
| C | 0.257093  | 3.888553  | -2.023693 |
| H | 0.103729  | 2.967589  | -2.603358 |
| C | 0.793537  | 5.020721  | -2.661478 |
| H | 1.053498  | 4.969998  | -3.730504 |
| C | 1.003412  | 6.207880  | -1.936855 |
| H | 1.428715  | 7.092267  | -2.437086 |
| C | 0.671939  | 6.262004  | -0.570300 |
| H | 0.833189  | 7.188905  | 0.002490  |
| C | 0.136866  | 5.132004  | 0.071363  |
| H | -0.114471 | 5.180196  | 1.143038  |
| C | -0.171168 | 2.629144  | 1.906067  |
| C | -0.983692 | 2.853381  | 3.036983  |
| H | -2.062914 | 3.037993  | 2.929170  |
| C | -0.415828 | 2.843281  | 4.325298  |
| H | -1.058830 | 3.016671  | 5.202494  |
| C | 0.961625  | 2.616195  | 4.492853  |
| H | 1.399752  | 2.603959  | 5.503293  |
| C | 1.779381  | 2.407503  | 3.365738  |
| H | 2.859122  | 2.226766  | 3.486974  |
| C | 1.217096  | 2.411720  | 2.080391  |
| H | 1.863677  | 2.232376  | 1.205416  |
| C | 0.206906  | -2.337716 | 1.305996  |
| H | -0.640604 | -2.529817 | 1.991181  |
| H | -0.036292 | -2.796326 | 0.327602  |
| C | 1.493801  | -2.844418 | 1.922505  |
| H | 1.466994  | -3.947198 | 2.060282  |
| H | 1.607849  | -2.397012 | 2.928405  |
| C | 3.853049  | -2.259435 | 2.058623  |
| H | 4.799677  | -2.363057 | 1.497776  |
| H | 3.847073  | -3.086986 | 2.803656  |
| C | 3.802636  | -0.895900 | 2.743112  |
| H | 4.659121  | -0.797804 | 3.440537  |
| H | 3.861179  | -0.075560 | 1.996658  |
| H | 2.869103  | -0.747909 | 3.322007  |
| C | 2.983734  | -3.614698 | 0.166066  |
| H | 2.035175  | -3.799562 | -0.381274 |
| H | 3.190332  | -4.524524 | 0.774644  |
| C | 4.122569  | -3.420231 | -0.833058 |
| H | 5.094396  | -3.289254 | -0.313476 |
| H | 4.216792  | -4.380233 | -1.382303 |
| C | 3.924356  | -2.339360 | -1.890293 |
| H | 4.741757  | -2.412430 | -2.640835 |
| H | 2.980328  | -2.517534 | -2.444137 |
| C | 5.117686  | -0.505463 | -0.665784 |
| H | 5.211900  | -1.107364 | 0.252829  |
| H | 4.931314  | 0.536180  | -0.336786 |
| C | 6.414813  | -0.600429 | -1.470473 |
| H | 7.242728  | -0.203301 | -0.848319 |
| H | 6.668677  | -1.647676 | -1.731458 |

|    |           |           |           |
|----|-----------|-----------|-----------|
| H  | 6.382237  | -0.004013 | -2.404527 |
| C  | 3.637259  | -0.006556 | -2.554983 |
| H  | 4.131997  | -0.421164 | -3.458552 |
| H  | 4.131442  | 0.956698  | -2.319405 |
| C  | 2.162701  | 0.244888  | -2.811784 |
| H  | 1.613888  | -0.660965 | -3.125848 |
| H  | 2.016547  | 1.037347  | -3.573943 |
| H  | -0.985728 | -1.068710 | -1.023449 |
| H  | -0.257372 | -1.364154 | -1.666583 |
| O  | 0.284064  | -2.339386 | -2.349740 |
| H  | -0.422195 | -3.090657 | -2.014483 |
| H  | 1.074277  | -2.508961 | -1.787863 |
| Cl | -1.642005 | -4.145948 | -1.310925 |
